# Supplementary material for: YEATS2 promotes malignant phenotypes of esophageal squamous cell carcinoma via H3K27ac activated-IL6ST
Source: Front Cell Dev Biol. 2025 Feb 18;13:1497290. doi: 10.3389/fcell.2025.1497290 (PMC11876388; doi:10.3389/fcell.2025.1497290)
Supplement: Supplementary file 2 [file Table3.xlsx]

## Sheet: Supplementary Table 3-Enriched 
Supplementary Table 3: GO enrichment analysis of differentially expressed genes in biological process categories
GO_P Term ID	GO_P Term Desc	GO_P Term Level1	GO_P Term Level2	Term Candidate Gene Num	Total Candidate Gene Num	Term Gene Num	Total Gene Num	Rich Ratio	P value	Q value	Gene ids	Gene Symbols
GO:0042633	hair cycle	biological_process	multicellular organismal process	4	172	16	17286	0.25	1.5692e-05	0.0196621	3.86839e+16	KRT16,KRT14,PTGS2,SOX21
GO:0070268	cornification	biological_process	cellular process	7	172	117	17286	0.0598291	0.000169141	0.105967	1.44501e+30	KRT80,KRT16,PERP,KRT14,KRT5,KRT81,KRT7
GO:0060389	pathway-restricted SMAD protein phosphorylation	biological_process	biological regulation	3	172	13	17286	0.230769	0.000257293	0.107463	40927042650	SMAD7,TGFB2,BMP2
GO:0048246	macrophage chemotaxis	biological_process	cellular process	3	172	16	17286	0.1875	0.000492842	0.154383	628962881907	SAA2,SAA1,EDN2
GO:0060065	uterus development	biological_process	developmental process	3	172	18	17286	0.166667	0.000707711	0.174227	704254333206	TGFB2,POLR2D,HOXA10
GO:0001516	prostaglandin biosynthetic process	biological_process	cellular process	3	172	19	17286	0.157895	0.000834285	0.174227	574395361907	PTGS2,PTGES,EDN2
GO:0090398	cellular senescence	biological_process	cellular process	3	172	25	17286	0.12	0.0018954	0.206646	7994102655170	KAT6A,CDKN1A,PRMT6
GO:1902513	regulation of organelle transport along microtubule	biological_process	cellular process	2	172	7	17286	0.285714	0.0020004	0.206646	900110988	HAP1,METAP2
GO:0010042	response to manganese ion	biological_process	response to stimulus	2	172	8	17286	0.25	0.00264978	0.206646	87545743	ADAM9,PTGS2
GO:0034616	response to laminar fluid shear stress	biological_process	response to stimulus	2	172	8	17286	0.25	0.00264978	0.206646	40928754	SMAD7,ADAM9
GO:0097756	negative regulation of blood vessel diameter	biological_process	biological regulation	2	172	8	17286	0.25	0.00264978	0.206646	2195375743	SMTNL1,PTGS2
GO:0010575	positive regulation of vascular endothelial growth factor production	biological_process	multicellular organismal process	3	172	29	17286	0.103448	0.00292477	0.206646	5743232133572	PTGS2,SULF1,IL6ST
GO:0071806	protein transmembrane transport	biological_process	localization	2	172	9	17286	0.222222	0.00338463	0.206646	1044056993	TIMM17A,TOMM22
GO:0048514	blood vessel morphogenesis	biological_process	developmental process	3	172	31	17286	0.0967742	0.00354598	0.206646	28533978831	ANGPT2,ID1,SYNGAP1
GO:0007179	transforming growth factor beta receptor signaling pathway	biological_process	biological regulation	5	172	104	17286	0.0480769	0.0038307	0.206646	4.0927e+20	SMAD7,TGFB2,FERMT2,ADAM9,ID1
GO:0050716	positive regulation of interleukin-1 secretion	biological_process	biological regulation	2	172	10	17286	0.2	0.00420319	0.206646	62896288	SAA2,SAA1
GO:0051592	response to calcium ion	biological_process	response to stimulus	4	172	67	17286	0.0597015	0.00445717	0.206646	8.75485e+16	ADAM9,ALG2,GDI1,PTGES
GO:0010467	gene expression	biological_process	metabolic process	3	172	34	17286	0.0882353	0.00461888	0.206646	40502852887	LTB,ANGPT2,GRB10
GO:0019371	cyclooxygenase pathway	biological_process	cellular process	2	172	11	17286	0.181818	0.00510376	0.206646	57439536	PTGS2,PTGES
GO:0030833	regulation of actin filament polymerization	biological_process	biological regulation	3	172	36	17286	0.0833333	0.00543178	0.206646	10095883154942	ARPC1B,SYNGAP1,ABITRAM
GO:0007249	I-kappaB kinase/NF-kappaB signaling	biological_process	biological regulation	4	172	71	17286	0.056338	0.00547976	0.206646	8.44334e+17	CARD11,TICAM2,BIRC3,TIAF1
GO:0048711	positive regulation of astrocyte differentiation	biological_process	biological regulation	2	172	12	17286	0.166667	0.00608464	0.206646	3572650	IL6ST,BMP2
GO:0001886	endothelial cell morphogenesis	biological_process	cellular component organization or biogenesis	2	172	13	17286	0.153846	0.00714416	0.206646	807813397	COL18A1,ID1
GO:0031581	hemidesmosome assembly	biological_process	cellular component organization or biogenesis	2	172	13	17286	0.153846	0.00714416	0.206646	38613852	KRT14,KRT5
GO:0032233	positive regulation of actin filament bundle assembly	biological_process	biological regulation	2	172	13	17286	0.153846	0.00714416	0.206646	113463397	SYNPO,ID1
GO:0032963	collagen metabolic process	biological_process	metabolic process	2	172	13	17286	0.153846	0.00714416	0.206646	552143397	P3H2,ID1
GO:0060317	cardiac epithelial to mesenchymal transition	biological_process	cellular process	2	172	13	17286	0.153846	0.00714416	0.206646	7042650	TGFB2,BMP2
GO:0003181	atrioventricular valve morphogenesis	biological_process	developmental process	2	172	14	17286	0.142857	0.00828067	0.206646	7042650	TGFB2,BMP2
GO:0051024	positive regulation of immunoglobulin secretion	biological_process	biological regulation	2	172	14	17286	0.142857	0.00828067	0.206646	93415433	VAMP3,POLR2D
GO:0097067	cellular response to thyroid hormone stimulus	biological_process	cellular process	2	172	14	17286	0.142857	0.00828067	0.206646	15141520	CTSL,CTSS
GO:0030593	neutrophil chemotaxis	biological_process	cellular process	4	172	83	17286	0.0481928	0.00945624	0.206646	7042628962881900	TGFB2,SAA2,SAA1,EDN2
GO:0006488	dolichol-linked oligosaccharide biosynthetic process	biological_process	metabolic process	2	172	15	17286	0.133333	0.00949256	0.206646	19985785365	ALG14,ALG2
GO:0030890	positive regulation of B cell proliferation	biological_process	biological regulation	3	172	44	17286	0.0681818	0.00950874	0.206646	8443310263574	CARD11,CDKN1A,IL7
GO:0003058	hormonal regulation of the force of heart contraction	biological_process	multicellular organismal process	1	172	1	17286	1	0.00995025	0.206646	1907	EDN2
GO:0003099	positive regulation of the force of heart contraction by chemical signal	biological_process	biological regulation	1	172	1	17286	1	0.00995025	0.206646	1907	EDN2
GO:0019740	nitrogen utilization	biological_process	nitrogen utilization	1	172	1	17286	1	0.00995025	0.206646	51557	LGSN
GO:0036164	cell-abiotic substrate adhesion	biological_process	biological adhesion	1	172	1	17286	1	0.00995025	0.206646	3397	ID1
GO:0046086	adenosine biosynthetic process	biological_process	cellular process	1	172	1	17286	1	0.00995025	0.206646	4907	NT5E
GO:0050655	dermatan sulfate proteoglycan metabolic process	biological_process	metabolic process	1	172	1	17286	1	0.00995025	0.206646	113189	CHST14
GO:0050928	negative regulation of positive chemotaxis	biological_process	locomotion	1	172	1	17286	1	0.00995025	0.206646	285	ANGPT2
GO:0051042	negative regulation of calcium-independent cell-cell adhesion	biological_process	biological adhesion	1	172	1	17286	1	0.00995025	0.206646	650	BMP2
GO:0051794	regulation of timing of catagen	biological_process	multicellular organismal process	1	172	1	17286	1	0.00995025	0.206646	7042	TGFB2
GO:0060064	Spemann organizer formation at the anterior end of the primitive streak	biological_process	developmental process	1	172	1	17286	1	0.00995025	0.206646	7473	WNT3
GO:0060804	positive regulation of Wnt signaling pathway by BMP signaling pathway	biological_process	biological regulation	1	172	1	17286	1	0.00995025	0.206646	650	BMP2
GO:0070060	'de novo' actin filament nucleation	biological_process	biological regulation	1	172	1	17286	1	0.00995025	0.206646	133746	JMY
GO:0071471	cellular response to non-ionic osmotic stress	biological_process	response to stimulus	1	172	1	17286	1	0.00995025	0.206646	5743	PTGS2
GO:0090361	regulation of platelet-derived growth factor production	biological_process	biological regulation	1	172	1	17286	1	0.00995025	0.206646	57447	NDRG2
GO:0099588	positive regulation of postsynaptic cytosolic calcium concentration	biological_process	biological regulation	1	172	1	17286	1	0.00995025	0.206646	11346	SYNPO
GO:0120158	positive regulation of collagen catabolic process	biological_process	biological regulation	1	172	1	17286	1	0.00995025	0.206646	64115	VSIR
GO:1900062	regulation of replicative cell aging	biological_process	biological regulation	1	172	1	17286	1	0.00995025	0.206646	6787	NEK4
GO:1902256	regulation of apoptotic process involved in outflow tract morphogenesis	biological_process	multicellular organismal process	1	172	1	17286	1	0.00995025	0.206646	7042	TGFB2
GO:1903043	positive regulation of chondrocyte hypertrophy	biological_process	cellular component organization or biogenesis	1	172	1	17286	1	0.00995025	0.206646	4092	SMAD7
GO:1903701	substantia propria of cornea development	biological_process	developmental process	1	172	1	17286	1	0.00995025	0.206646	7042	TGFB2
GO:1903901	negative regulation of viral life cycle	biological_process	biological regulation	1	172	1	17286	1	0.00995025	0.206646	9235	IL32
GO:1904738	vascular associated smooth muscle cell migration	biological_process	cellular process	1	172	1	17286	1	0.00995025	0.206646	2887	GRB10
GO:1905355	spine apparatus assembly	biological_process	cellular component organization or biogenesis	1	172	1	17286	1	0.00995025	0.206646	11346	SYNPO
GO:1905474	canonical Wnt signaling pathway involved in stem cell proliferation	biological_process	biological regulation	1	172	1	17286	1	0.00995025	0.206646	7473	WNT3
GO:1990755	mitotic spindle microtubule depolymerization	biological_process	cellular component organization or biogenesis	1	172	1	17286	1	0.00995025	0.206646	126731	CCSAP
GO:2000097	regulation of smooth muscle cell-matrix adhesion	biological_process	biological regulation	1	172	1	17286	1	0.00995025	0.206646	5328	PLAU
GO:2000565	negative regulation of CD8-positive, alpha-beta T cell proliferation	biological_process	biological adhesion	1	172	1	17286	1	0.00995025	0.206646	64115	VSIR
GO:0030177	positive regulation of Wnt signaling pathway	biological_process	biological regulation	3	172	45	17286	0.0666667	0.0101146	0.206646	747323213650	WNT3,SULF1,BMP2
GO:0014070	response to organic cyclic compound	biological_process	response to stimulus	5	172	132	17286	0.0378788	0.010329	0.206646	2.8534e+18	ANGPT2,ID1,PTGS2,PTGES,CDKN1A
GO:0033630	positive regulation of cell adhesion mediated by integrin	biological_process	biological regulation	2	172	16	17286	0.125	0.0107782	0.206646	70428754	TGFB2,ADAM9
GO:0045778	positive regulation of ossification	biological_process	biological regulation	2	172	16	17286	0.125	0.0107782	0.206646	7042650	TGFB2,BMP2
GO:0046039	GTP metabolic process	biological_process	cellular process	2	172	16	17286	0.125	0.0107782	0.206646	5080851715	AK3,RAB23
GO:1901653	cellular response to peptide	biological_process	cellular process	2	172	17	17286	0.117647	0.0121361	0.206646	551073397	ANO1,ID1
GO:1990264	peptidyl-tyrosine dephosphorylation involved in inactivation of protein kinase activity	biological_process	biological regulation	2	172	17	17286	0.117647	0.0121361	0.206646	57871846	PTPRB,DUSP4
GO:0019221	cytokine-mediated signaling pathway	biological_process	biological regulation	8	172	309	17286	0.02589	0.0123242	0.206646	5.74363e+31	PTGS2,SAA2,CDKN1A,IL6ST,SAA1,IL7,EDN2,IL32
GO:0030509	BMP signaling pathway	biological_process	biological regulation	4	172	90	17286	0.0444444	0.0124665	0.206646	409270423397650	SMAD7,TGFB2,ID1,BMP2
GO:0007597	blood coagulation, intrinsic pathway	biological_process	multicellular organismal process	2	172	18	17286	0.111111	0.0135647	0.206646	28127450	GP1BB,VWF
GO:0034314	Arp2/3 complex-mediated actin nucleation	biological_process	biological regulation	2	172	18	17286	0.111111	0.0135647	0.206646	13374610095	JMY,ARPC1B
GO:0042326	negative regulation of phosphorylation	biological_process	biological regulation	2	172	18	17286	0.111111	0.0135647	0.206646	28871026	GRB10,CDKN1A
GO:0003203	endocardial cushion morphogenesis	biological_process	developmental process	2	172	19	17286	0.105263	0.0150624	0.206646	7042650	TGFB2,BMP2
GO:0050708	regulation of protein secretion	biological_process	biological regulation	2	172	19	17286	0.105263	0.0150624	0.206646	62896288	SAA2,SAA1
GO:0061036	positive regulation of cartilage development	biological_process	biological regulation	2	172	19	17286	0.105263	0.0150624	0.206646	6660650	SOX5,BMP2
GO:0008285	negative regulation of cell proliferation	biological_process	biological regulation	10	172	452	17286	0.0221239	0.0151951	0.206646	2.4447e+41	FRK,TGFB2,P3H2,PTPN14,COL18A1,PTGS2,PTGES,CDKN1A,BMP2,DDAH1
GO:0031424	keratinization	biological_process	developmental process	6	172	204	17286	0.0294118	0.0164617	0.206646	1.44501e+25	KRT80,KRT16,KRT14,KRT5,KRT81,KRT7
GO:0050918	positive chemotaxis	biological_process	locomotion	3	172	56	17286	0.0535714	0.0182546	0.206646	785762896288	SCG2,SAA2,SAA1
GO:0006796	phosphate-containing compound metabolic process	biological_process	cellular process	2	172	21	17286	0.0952381	0.0182592	0.206646	57876574	PTPRB,SLC20A1
GO:0045987	positive regulation of smooth muscle contraction	biological_process	biological regulation	2	172	21	17286	0.0952381	0.0182592	0.206646	57431907	PTGS2,EDN2
GO:0002337	B-1a B cell differentiation	biological_process	cellular process	1	172	2	17286	0.5	0.0198021	0.206646	112616	CMTM7
GO:0006196	AMP catabolic process	biological_process	metabolic process	1	172	2	17286	0.5	0.0198021	0.206646	4907	NT5E
GO:0006542	glutamine biosynthetic process	biological_process	cellular process	1	172	2	17286	0.5	0.0198021	0.206646	51557	LGSN
GO:0010359	regulation of anion channel activity	biological_process	biological regulation	1	172	2	17286	0.5	0.0198021	0.206646	285966	TCAF2
GO:0010360	negative regulation of anion channel activity	biological_process	biological regulation	1	172	2	17286	0.5	0.0198021	0.206646	285966	TCAF2
GO:0014846	esophagus smooth muscle contraction	biological_process	multicellular organismal process	1	172	2	17286	0.5	0.0198021	0.206646	23213	SULF1
GO:0016269	O-glycan processing, core 3	biological_process	cellular process	1	172	2	17286	0.5	0.0198021	0.206646	11041	B4GAT1
GO:0031990	mRNA export from nucleus in response to heat stress	biological_process	cellular process	1	172	2	17286	0.5	0.0198021	0.206646	5433	POLR2D
GO:0032227	negative regulation of synaptic transmission, dopaminergic	biological_process	cellular process	1	172	2	17286	0.5	0.0198021	0.206646	5743	PTGS2
GO:0032901	positive regulation of neurotrophin production	biological_process	biological regulation	1	172	2	17286	0.5	0.0198021	0.206646	9001	HAP1
GO:0033979	box H/ACA snoRNA metabolic process	biological_process	cellular process	1	172	2	17286	0.5	0.0198021	0.206646	9221	NOLC1
GO:0034402	recruitment of 3'-end processing factors to RNA polymerase II holoenzyme complex	biological_process	cellular component organization or biogenesis	1	172	2	17286	0.5	0.0198021	0.206646	5433	POLR2D
GO:0034970	histone H3-R2 methylation	biological_process	cellular process	1	172	2	17286	0.5	0.0198021	0.206646	55170	PRMT6
GO:0035051	cardiocyte differentiation	biological_process	cellular process	1	172	2	17286	0.5	0.0198021	0.206646	650	BMP2
GO:0038154	interleukin-11-mediated signaling pathway	biological_process	biological regulation	1	172	2	17286	0.5	0.0198021	0.206646	3572	IL6ST
GO:0042704	uterine wall breakdown	biological_process	multicellular organismal process	1	172	2	17286	0.5	0.0198021	0.206646	7042	TGFB2
GO:0044338	canonical Wnt signaling pathway involved in mesenchymal stem cell differentiation	biological_process	biological regulation	1	172	2	17286	0.5	0.0198021	0.206646	7473	WNT3
GO:0044339	canonical Wnt signaling pathway involved in osteoblast differentiation	biological_process	biological regulation	1	172	2	17286	0.5	0.0198021	0.206646	7473	WNT3
GO:0046041	ITP metabolic process	biological_process	cellular process	1	172	2	17286	0.5	0.0198021	0.206646	50808	AK3
GO:0046051	UTP metabolic process	biological_process	cellular process	1	172	2	17286	0.5	0.0198021	0.206646	50808	AK3
GO:0048697	positive regulation of collateral sprouting in absence of injury	biological_process	biological regulation	1	172	2	17286	0.5	0.0198021	0.206646	7473	WNT3
GO:0060128	corticotropin hormone secreting cell differentiation	biological_process	cellular process	1	172	2	17286	0.5	0.0198021	0.206646	650	BMP2
GO:0062029	positive regulation of stress granule assembly	biological_process	biological regulation	1	172	2	17286	0.5	0.0198021	0.206646	9908	G3BP2
GO:0070104	negative regulation of interleukin-6-mediated signaling pathway	biological_process	biological regulation	1	172	2	17286	0.5	0.0198021	0.206646	3572	IL6ST
GO:0071888	macrophage apoptotic process	biological_process	cellular process	1	172	2	17286	0.5	0.0198021	0.206646	1514	CTSL
GO:0072393	microtubule anchoring at microtubule organizing center	biological_process	cellular component organization or biogenesis	1	172	2	17286	0.5	0.0198021	0.206646	23299	BICD2
GO:0090362	positive regulation of platelet-derived growth factor production	biological_process	biological regulation	1	172	2	17286	0.5	0.0198021	0.206646	5743	PTGS2
GO:0098880	maintenance of postsynaptic specialization structure	biological_process	cellular component organization or biogenesis	1	172	2	17286	0.5	0.0198021	0.206646	8831	SYNGAP1
GO:0098886	modification of dendritic spine	biological_process	cellular process	1	172	2	17286	0.5	0.0198021	0.206646	11346	SYNPO
GO:1900038	negative regulation of cellular response to hypoxia	biological_process	biological regulation	1	172	2	17286	0.5	0.0198021	0.206646	23576	DDAH1
GO:1901137	carbohydrate derivative biosynthetic process	biological_process	metabolic process	1	172	2	17286	0.5	0.0198021	0.206646	9945	GFPT2
GO:1901342	regulation of vasculature development	biological_process	biological regulation	1	172	2	17286	0.5	0.0198021	0.206646	3397	ID1
GO:1903531	negative regulation of secretion by cell	biological_process	biological regulation	1	172	2	17286	0.5	0.0198021	0.206646	9341	VAMP3
GO:1905006	negative regulation of epithelial to mesenchymal transition involved in endocardial cushion formation	biological_process	biological regulation	1	172	2	17286	0.5	0.0198021	0.206646	7042	TGFB2
GO:1905179	negative regulation of cardiac muscle tissue regeneration	biological_process	biological regulation	1	172	2	17286	0.5	0.0198021	0.206646	1026	CDKN1A
GO:2000317	negative regulation of T-helper 17 type immune response	biological_process	biological regulation	1	172	2	17286	0.5	0.0198021	0.206646	4092	SMAD7
GO:2000494	positive regulation of interleukin-18-mediated signaling pathway	biological_process	biological regulation	1	172	2	17286	0.5	0.0198021	0.206646	353376	TICAM2
GO:2000575	negative regulation of microtubule motor activity	biological_process	biological regulation	1	172	2	17286	0.5	0.0198021	0.206646	10988	METAP2
GO:0002756	MyD88-independent toll-like receptor signaling pathway	biological_process	biological regulation	2	172	22	17286	0.0909091	0.0199554	0.206646	353376330	TICAM2,BIRC3
GO:0045948	positive regulation of translational initiation	biological_process	biological regulation	2	172	22	17286	0.0909091	0.0199554	0.206646	229275433	HABP4,POLR2D
GO:0050730	regulation of peptidyl-tyrosine phosphorylation	biological_process	biological regulation	2	172	22	17286	0.0909091	0.0199554	0.206646	20453574	EPHA7,IL7
GO:0050728	negative regulation of inflammatory response	biological_process	biological regulation	4	172	104	17286	0.0384615	0.020174	0.207159	4907628954656280	NT5E,SAA2,PPARA,SAA1
GO:0001525	angiogenesis	biological_process	developmental process	7	172	275	17286	0.0254545	0.0203357	0.207159	5.69136e+28	C1GALT1,PTPRB,ANGPT2,COL18A1,ID1,PTGS2,SCG2
GO:0031589	cell-substrate adhesion	biological_process	biological adhesion	2	172	23	17286	0.0869565	0.0217149	0.210421	2857450	ANGPT2,VWF
GO:0050771	negative regulation of axonogenesis	biological_process	biological regulation	2	172	23	17286	0.0869565	0.0217149	0.210421	26648831	GDI1,SYNGAP1
GO:0034605	cellular response to heat	biological_process	cellular process	3	172	61	17286	0.0491803	0.0228661	0.210421	5510757431026	ANO1,PTGS2,CDKN1A
GO:0048169	regulation of long-term neuronal synaptic plasticity	biological_process	biological regulation	2	172	24	17286	0.0833333	0.0235362	0.210421	113468831	SYNPO,SYNGAP1
GO:0034097	response to cytokine	biological_process	response to stimulus	3	172	63	17286	0.047619	0.0248717	0.210421	574395363572	PTGS2,PTGES,IL6ST
GO:0009792	embryo development ending in birth or egg hatching	biological_process	developmental process	2	172	25	17286	0.08	0.025418	0.210421	7042130507	TGFB2,UBR3
GO:0042246	tissue regeneration	biological_process	developmental process	2	172	25	17286	0.08	0.025418	0.210421	48141026	NINJ1,CDKN1A
GO:0071560	cellular response to transforming growth factor beta stimulus	biological_process	cellular process	3	172	64	17286	0.046875	0.025909	0.210421	409233976660	SMAD7,ID1,SOX5
GO:0030168	platelet activation	biological_process	biological regulation	4	172	113	17286	0.0353982	0.0263931	0.210421	2812745062896280	GP1BB,VWF,SAA2,SAA1
GO:0007094	mitotic spindle assembly checkpoint	biological_process	biological regulation	2	172	26	17286	0.0769231	0.0273589	0.210421	40859183	MAD2L1,ZW10
GO:0072332	intrinsic apoptotic signaling pathway by p53 class mediator	biological_process	biological regulation	2	172	26	17286	0.0769231	0.0273589	0.210421	64065133746	PERP,JMY
GO:1901673	regulation of mitotic spindle assembly	biological_process	biological regulation	2	172	26	17286	0.0769231	0.0273589	0.210421	51534126731	VTA1,CCSAP
GO:0046580	negative regulation of Ras protein signal transduction	biological_process	biological regulation	2	172	27	17286	0.0740741	0.0293576	0.210421	70428831	TGFB2,SYNGAP1
GO:0000052	citrulline metabolic process	biological_process	metabolic process	1	172	3	17286	0.333333	0.0295564	0.210421	23576	DDAH1
GO:0000379	tRNA-type intron splice site recognition and cleavage	biological_process	cellular process	1	172	3	17286	0.333333	0.0295564	0.210421	283989	TSEN54
GO:0003130	BMP signaling pathway involved in heart induction	biological_process	biological regulation	1	172	3	17286	0.333333	0.0295564	0.210421	650	BMP2
GO:0003308	negative regulation of Wnt signaling pathway involved in heart development	biological_process	biological regulation	1	172	3	17286	0.333333	0.0295564	0.210421	650	BMP2
GO:0009166	nucleotide catabolic process	biological_process	cellular process	1	172	3	17286	0.333333	0.0295564	0.210421	4907	NT5E
GO:0010574	regulation of vascular endothelial growth factor production	biological_process	biological regulation	1	172	3	17286	0.333333	0.0295564	0.210421	57447	NDRG2
GO:0010621	negative regulation of transcription by transcription factor localization	biological_process	biological regulation	1	172	3	17286	0.333333	0.0295564	0.210421	3397	ID1
GO:0010693	negative regulation of alkaline phosphatase activity	biological_process	biological regulation	1	172	3	17286	0.333333	0.0295564	0.210421	7042	TGFB2
GO:0010871	negative regulation of receptor biosynthetic process	biological_process	biological regulation	1	172	3	17286	0.333333	0.0295564	0.210421	5465	PPARA
GO:0015732	prostaglandin transport	biological_process	localization	1	172	3	17286	0.333333	0.0295564	0.210421	6578	SLCO2A1
GO:0016267	O-glycan processing, core 1	biological_process	cellular process	1	172	3	17286	0.333333	0.0295564	0.210421	56913	C1GALT1
GO:0030201	heparan sulfate proteoglycan metabolic process	biological_process	cellular process	1	172	3	17286	0.333333	0.0295564	0.210421	23213	SULF1
GO:0033577	protein glycosylation in endoplasmic reticulum	biological_process	cellular process	1	172	3	17286	0.333333	0.0295564	0.210421	85365	ALG2
GO:0034633	retinol transport	biological_process	localization	1	172	3	17286	0.333333	0.0295564	0.210421	5433	POLR2D
GO:0034769	basement membrane disassembly	biological_process	cellular component organization or biogenesis	1	172	3	17286	0.333333	0.0295564	0.210421	1520	CTSS
GO:0035054	embryonic heart tube anterior/posterior pattern specification	biological_process	developmental process	1	172	3	17286	0.333333	0.0295564	0.210421	650	BMP2
GO:0035879	plasma membrane lactate transport	biological_process	localization	1	172	3	17286	0.333333	0.0295564	0.210421	9123	SLC16A3
GO:0039535	regulation of RIG-I signaling pathway	biological_process	biological regulation	1	172	3	17286	0.333333	0.0295564	0.210421	330	BIRC3
GO:0048002	antigen processing and presentation of peptide antigen	biological_process	immune system process	1	172	3	17286	0.333333	0.0295564	0.210421	1520	CTSS
GO:0048630	skeletal muscle tissue growth	biological_process	developmental process	1	172	3	17286	0.333333	0.0295564	0.210421	1134	CHRNA1
GO:0051088	PMA-inducible membrane protein ectodomain proteolysis	biological_process	metabolic process	1	172	3	17286	0.333333	0.0295564	0.210421	8754	ADAM9
GO:0051204	protein insertion into mitochondrial membrane	biological_process	cellular component organization or biogenesis	1	172	3	17286	0.333333	0.0295564	0.210421	56993	TOMM22
GO:0051795	positive regulation of timing of catagen	biological_process	biological phase	1	172	3	17286	0.333333	0.0295564	0.210421	7042	TGFB2
GO:0055059	asymmetric neuroblast division	biological_process	cell proliferation	1	172	3	17286	0.333333	0.0295564	0.210421	6660	SOX5
GO:0060129	thyroid-stimulating hormone-secreting cell differentiation	biological_process	cellular process	1	172	3	17286	0.333333	0.0295564	0.210421	650	BMP2
GO:0060585	positive regulation of prostaglandin-endoperoxide synthase activity	biological_process	biological regulation	1	172	3	17286	0.333333	0.0295564	0.210421	1907	EDN2
GO:0061577	calcium ion transmembrane transport via high voltage-gated calcium channel	biological_process	localization	1	172	3	17286	0.333333	0.0295564	0.210421	781	CACNA2D1
GO:0070084	protein initiator methionine removal	biological_process	cellular process	1	172	3	17286	0.333333	0.0295564	0.210421	10988	METAP2
GO:0070424	regulation of nucleotide-binding oligomerization domain containing signaling pathway	biological_process	biological regulation	1	172	3	17286	0.333333	0.0295564	0.210421	330	BIRC3
GO:0071596	ubiquitin-dependent protein catabolic process via the N-end rule pathway	biological_process	cellular process	1	172	3	17286	0.333333	0.0295564	0.210421	130507	UBR3
GO:0072138	mesenchymal cell proliferation involved in ureteric bud development	biological_process	cell proliferation	1	172	3	17286	0.333333	0.0295564	0.210421	650	BMP2
GO:0086048	membrane depolarization during bundle of His cell action potential	biological_process	biological regulation	1	172	3	17286	0.333333	0.0295564	0.210421	781	CACNA2D1
GO:0098903	regulation of membrane repolarization during action potential	biological_process	biological regulation	1	172	3	17286	0.333333	0.0295564	0.210421	781	CACNA2D1
GO:1901953	positive regulation of anterograde dense core granule transport	biological_process	biological regulation	1	172	3	17286	0.333333	0.0295564	0.210421	10988	METAP2
GO:1902603	carnitine transmembrane transport	biological_process	localization	1	172	3	17286	0.333333	0.0295564	0.210421	6583	SLC22A4
GO:1903593	regulation of histamine secretion by mast cell	biological_process	biological regulation	1	172	3	17286	0.333333	0.0295564	0.210421	9341	VAMP3
GO:1903744	positive regulation of anterograde synaptic vesicle transport	biological_process	biological regulation	1	172	3	17286	0.333333	0.0295564	0.210421	10988	METAP2
GO:1904395	positive regulation of skeletal muscle acetylcholine-gated channel clustering	biological_process	cellular process	1	172	3	17286	0.333333	0.0295564	0.210421	23184	MESD
GO:1904527	negative regulation of microtubule binding	biological_process	biological regulation	1	172	3	17286	0.333333	0.0295564	0.210421	10988	METAP2
GO:2000116	regulation of cysteine-type endopeptidase activity	biological_process	biological regulation	1	172	3	17286	0.333333	0.0295564	0.210421	330	BIRC3
GO:0016055	Wnt signaling pathway	biological_process	biological regulation	6	172	238	17286	0.0252101	0.0319816	0.218282	1.09792e+27	FERMT2,FRAT2,MESD,WNT3,CDK14,NDRG2
GO:0045165	cell fate commitment	biological_process	cellular process	3	172	71	17286	0.0422535	0.0338104	0.218282	74736660650	WNT3,SOX5,BMP2
GO:0006693	prostaglandin metabolic process	biological_process	cellular process	2	172	30	17286	0.0666667	0.035687	0.218282	57439536	PTGS2,PTGES
GO:0022400	regulation of rhodopsin mediated signaling pathway	biological_process	response to stimulus	2	172	30	17286	0.0666667	0.035687	0.218282	109889616	METAP2,RNF7
GO:0001666	response to hypoxia	biological_process	response to stimulus	5	172	185	17286	0.027027	0.0377387	0.218282	7.04229e+17	TGFB2,ANGPT2,PPARA,PLAU,BMP2
GO:0006626	protein targeting to mitochondrion	biological_process	cellular component organization or biogenesis	2	172	31	17286	0.0645161	0.0379036	0.218282	1044056993	TIMM17A,TOMM22
GO:0010243	response to organonitrogen compound	biological_process	response to stimulus	2	172	31	17286	0.0645161	0.0379036	0.218282	57431026	PTGS2,CDKN1A
GO:0003274	endocardial cushion fusion	biological_process	biological adhesion	1	172	4	17286	0.25	0.0392142	0.218282	7042	TGFB2
GO:0006760	folic acid-containing compound metabolic process	biological_process	cellular process	1	172	4	17286	0.25	0.0392142	0.218282	2346	FOLH1
GO:0010002	cardioblast differentiation	biological_process	cellular process	1	172	4	17286	0.25	0.0392142	0.218282	7042	TGFB2
GO:0010565	regulation of cellular ketone metabolic process	biological_process	biological regulation	1	172	4	17286	0.25	0.0392142	0.218282	5465	PPARA
GO:0014826	vein smooth muscle contraction	biological_process	multicellular organismal process	1	172	4	17286	0.25	0.0392142	0.218282	1907	EDN2
GO:0015697	quaternary ammonium group transport	biological_process	localization	1	172	4	17286	0.25	0.0392142	0.218282	6583	SLC22A4
GO:0015705	iodide transport	biological_process	localization	1	172	4	17286	0.25	0.0392142	0.218282	55107	ANO1
GO:0032348	negative regulation of aldosterone biosynthetic process	biological_process	biological regulation	1	172	4	17286	0.25	0.0392142	0.218282	650	BMP2
GO:0032909	regulation of transforming growth factor beta2 production	biological_process	biological regulation	1	172	4	17286	0.25	0.0392142	0.218282	7042	TGFB2
GO:0032925	regulation of activin receptor signaling pathway	biological_process	biological regulation	1	172	4	17286	0.25	0.0392142	0.218282	4092	SMAD7
GO:0032970	regulation of actin filament-based process	biological_process	biological regulation	1	172	4	17286	0.25	0.0392142	0.218282	58527	ABRACL
GO:0033688	regulation of osteoblast proliferation	biological_process	biological regulation	1	172	4	17286	0.25	0.0392142	0.218282	4883	NPR3
GO:0035669	TRAM-dependent toll-like receptor 4 signaling pathway	biological_process	biological regulation	1	172	4	17286	0.25	0.0392142	0.218282	353376	TICAM2
GO:0038098	sequestering of BMP from receptor via BMP binding	biological_process	biological regulation	1	172	4	17286	0.25	0.0392142	0.218282	100532736	MICOS10-NBL1
GO:0042482	positive regulation of odontogenesis	biological_process	biological regulation	1	172	4	17286	0.25	0.0392142	0.218282	650	BMP2
GO:0045040	protein import into mitochondrial outer membrane	biological_process	cellular component organization or biogenesis	1	172	4	17286	0.25	0.0392142	0.218282	56993	TOMM22
GO:0045726	positive regulation of integrin biosynthetic process	biological_process	cellular component organization or biogenesis	1	172	4	17286	0.25	0.0392142	0.218282	7042	TGFB2
GO:0046649	lymphocyte activation	biological_process	cellular process	1	172	4	17286	0.25	0.0392142	0.218282	84433	CARD11
GO:0048014	Tie signaling pathway	biological_process	biological regulation	1	172	4	17286	0.25	0.0392142	0.218282	285	ANGPT2
GO:0048807	female genitalia morphogenesis	biological_process	developmental process	1	172	4	17286	0.25	0.0392142	0.218282	5433	POLR2D
GO:0048861	leukemia inhibitory factor signaling pathway	biological_process	biological regulation	1	172	4	17286	0.25	0.0392142	0.218282	3572	IL6ST
GO:0051599	response to hydrostatic pressure	biological_process	response to stimulus	1	172	4	17286	0.25	0.0392142	0.218282	80781	COL18A1
GO:0060574	intestinal epithelial cell maturation	biological_process	cellular process	1	172	4	17286	0.25	0.0392142	0.218282	1026	CDKN1A
GO:0060686	negative regulation of prostatic bud formation	biological_process	biological regulation	1	172	4	17286	0.25	0.0392142	0.218282	23213	SULF1
GO:0070254	mucus secretion	biological_process	biological regulation	1	172	4	17286	0.25	0.0392142	0.218282	9341	VAMP3
GO:0070970	interleukin-2 secretion	biological_process	cellular process	1	172	4	17286	0.25	0.0392142	0.218282	84433	CARD11
GO:0072385	minus-end-directed organelle transport along microtubule	biological_process	cellular process	1	172	4	17286	0.25	0.0392142	0.218282	23299	BICD2
GO:0090400	stress-induced premature senescence	biological_process	cellular process	1	172	4	17286	0.25	0.0392142	0.218282	1026	CDKN1A
GO:1901135	carbohydrate derivative metabolic process	biological_process	metabolic process	1	172	4	17286	0.25	0.0392142	0.218282	9945	GFPT2
GO:1902731	negative regulation of chondrocyte proliferation	biological_process	biological regulation	1	172	4	17286	0.25	0.0392142	0.218282	4092	SMAD7
GO:1904030	negative regulation of cyclin-dependent protein kinase activity	biological_process	biological regulation	1	172	4	17286	0.25	0.0392142	0.218282	1026	CDKN1A
GO:1904031	positive regulation of cyclin-dependent protein kinase activity	biological_process	biological regulation	1	172	4	17286	0.25	0.0392142	0.218282	1026	CDKN1A
GO:1904954	canonical Wnt signaling pathway involved in midbrain dopaminergic neuron differentiation	biological_process	biological regulation	1	172	4	17286	0.25	0.0392142	0.218282	7473	WNT3
GO:1905636	positive regulation of RNA polymerase II regulatory region sequence-specific DNA binding	biological_process	biological regulation	1	172	4	17286	0.25	0.0392142	0.218282	9235	IL32
GO:2000065	negative regulation of cortisol biosynthetic process	biological_process	biological regulation	1	172	4	17286	0.25	0.0392142	0.218282	650	BMP2
GO:2000741	positive regulation of mesenchymal stem cell differentiation	biological_process	biological regulation	1	172	4	17286	0.25	0.0392142	0.218282	6660	SOX5
GO:0051384	response to glucocorticoid	biological_process	response to stimulus	3	172	76	17286	0.0394737	0.0401332	0.218282	875457431026	ADAM9,PTGS2,CDKN1A
GO:0008089	anterograde axonal transport	biological_process	cellular process	2	172	32	17286	0.0625	0.0401715	0.218282	552079001	ARL8B,HAP1
GO:0035666	TRIF-dependent toll-like receptor signaling pathway	biological_process	biological regulation	2	172	32	17286	0.0625	0.0401715	0.218282	353376330	TICAM2,BIRC3
GO:0043408	regulation of MAPK cascade	biological_process	biological regulation	2	172	32	17286	0.0625	0.0401715	0.218282	33978831	ID1,SYNGAP1
GO:0050715	positive regulation of cytokine secretion	biological_process	biological regulation	2	172	32	17286	0.0625	0.0401715	0.218282	62896288	SAA2,SAA1
GO:0000132	establishment of mitotic spindle orientation	biological_process	cellular component organization or biogenesis	2	172	33	17286	0.0606061	0.0424896	0.218282	40859183	MAD2L1,ZW10
GO:0034612	response to tumor necrosis factor	biological_process	response to stimulus	2	172	34	17286	0.0588235	0.0448565	0.218282	87545743	ADAM9,PTGS2
GO:0048662	negative regulation of smooth muscle cell proliferation	biological_process	biological regulation	2	172	34	17286	0.0588235	0.0448565	0.218282	488357447	NPR3,NDRG2
GO:0002576	platelet degranulation	biological_process	cellular process	4	172	135	17286	0.0296296	0.0459818	0.218282	7.04223e+17	TGFB2,HABP4,FAM3C,VWF
GO:0007265	Ras protein signal transduction	biological_process	biological regulation	3	172	81	17286	0.037037	0.0470104	0.218282	990888311026	G3BP2,SYNGAP1,CDKN1A
GO:0032091	negative regulation of protein binding	biological_process	biological regulation	3	172	81	17286	0.037037	0.0470104	0.218282	339710265465	ID1,CDKN1A,PPARA
GO:0001937	negative regulation of endothelial cell proliferation	biological_process	biological regulation	2	172	35	17286	0.0571429	0.0472711	0.218282	785723213	SCG2,SULF1
GO:0007093	mitotic cell cycle checkpoint	biological_process	biological regulation	2	172	35	17286	0.0571429	0.0472711	0.218282	40859183	MAD2L1,ZW10
GO:0045907	positive regulation of vasoconstriction	biological_process	biological regulation	2	172	35	17286	0.0571429	0.0472711	0.218282	2195375743	SMTNL1,PTGS2
GO:0000187	activation of MAPK activity	biological_process	biological regulation	4	172	137	17286	0.0291971	0.0480758	0.218282	3.87523e+16	TMEM189-UBE2V1,SAA2,SAA1,BMP2
GO:0051216	cartilage development	biological_process	developmental process	3	172	82	17286	0.0365854	0.0484512	0.218282	232136660650	SULF1,SOX5,BMP2
GO:0002158	osteoclast proliferation	biological_process	cell proliferation	1	172	5	17286	0.2	0.0487765	0.218282	4883	NPR3
GO:0003289	atrial septum primum morphogenesis	biological_process	multicellular organismal process	1	172	5	17286	0.2	0.0487765	0.218282	7042	TGFB2
GO:0006172	ADP biosynthetic process	biological_process	cellular process	1	172	5	17286	0.2	0.0487765	0.218282	50808	AK3
GO:0006490	oligosaccharide-lipid intermediate biosynthetic process	biological_process	metabolic process	1	172	5	17286	0.2	0.0487765	0.218282	85365	ALG2
GO:0007000	nucleolus organization	biological_process	cellular component organization or biogenesis	1	172	5	17286	0.2	0.0487765	0.218282	9221	NOLC1
GO:0010891	negative regulation of sequestering of triglyceride	biological_process	biological regulation	1	172	5	17286	0.2	0.0487765	0.218282	5465	PPARA
GO:0010894	negative regulation of steroid biosynthetic process	biological_process	biological regulation	1	172	5	17286	0.2	0.0487765	0.218282	650	BMP2
GO:0010922	positive regulation of phosphatase activity	biological_process	biological regulation	1	172	5	17286	0.2	0.0487765	0.218282	650	BMP2
GO:0010936	negative regulation of macrophage cytokine production	biological_process	biological regulation	1	172	5	17286	0.2	0.0487765	0.218282	7042	TGFB2
GO:0014910	regulation of smooth muscle cell migration	biological_process	cellular process	1	172	5	17286	0.2	0.0487765	0.218282	5328	PLAU
GO:0015879	carnitine transport	biological_process	localization	1	172	5	17286	0.2	0.0487765	0.218282	6583	SLC22A4
GO:0015917	aminophospholipid transport	biological_process	localization	1	172	5	17286	0.2	0.0487765	0.218282	161291	TMEM30B
GO:0019919	peptidyl-arginine methylation, to asymmetrical-dimethyl arginine	biological_process	metabolic process	1	172	5	17286	0.2	0.0487765	0.218282	55170	PRMT6
GO:0021979	hypothalamus cell differentiation	biological_process	cellular process	1	172	5	17286	0.2	0.0487765	0.218282	9001	HAP1
GO:0031365	N-terminal protein amino acid modification	biological_process	cellular process	1	172	5	17286	0.2	0.0487765	0.218282	10988	METAP2
GO:0033564	anterior/posterior axon guidance	biological_process	developmental process	1	172	5	17286	0.2	0.0487765	0.218282	90249	UNC5A
GO:0034241	positive regulation of macrophage fusion	biological_process	biological regulation	1	172	5	17286	0.2	0.0487765	0.218282	8754	ADAM9
GO:0035582	sequestering of BMP in extracellular matrix	biological_process	biological regulation	1	172	5	17286	0.2	0.0487765	0.218282	100532736	MICOS10-NBL1
GO:0035609	C-terminal protein deglutamylation	biological_process	cellular process	1	172	5	17286	0.2	0.0487765	0.218282	2346	FOLH1
GO:0035910	ascending aorta morphogenesis	biological_process	developmental process	1	172	5	17286	0.2	0.0487765	0.218282	7042	TGFB2
GO:0038165	oncostatin-M-mediated signaling pathway	biological_process	biological regulation	1	172	5	17286	0.2	0.0487765	0.218282	3572	IL6ST
GO:0045061	thymic T cell selection	biological_process	cellular process	1	172	5	17286	0.2	0.0487765	0.218282	84433	CARD11
GO:0045923	positive regulation of fatty acid metabolic process	biological_process	biological regulation	1	172	5	17286	0.2	0.0487765	0.218282	5465	PPARA
GO:0045986	negative regulation of smooth muscle contraction	biological_process	regulation of biological process	1	172	5	17286	0.2	0.0487765	0.218282	5743	PTGS2
GO:0048755	branching morphogenesis of a nerve	biological_process	developmental process	1	172	5	17286	0.2	0.0487765	0.218282	2045	EPHA7
GO:0050881	musculoskeletal movement	biological_process	multicellular organismal process	1	172	5	17286	0.2	0.0487765	0.218282	1134	CHRNA1
GO:0051546	keratinocyte migration	biological_process	cellular process	1	172	5	17286	0.2	0.0487765	0.218282	3868	KRT16
GO:0060157	urinary bladder development	biological_process	developmental process	1	172	5	17286	0.2	0.0487765	0.218282	5433	POLR2D
GO:0060485	mesenchyme development	biological_process	developmental process	1	172	5	17286	0.2	0.0487765	0.218282	650	BMP2
GO:0070120	ciliary neurotrophic factor-mediated signaling pathway	biological_process	biological regulation	1	172	5	17286	0.2	0.0487765	0.218282	3572	IL6ST
GO:0071284	cellular response to lead ion	biological_process	cellular process	1	172	5	17286	0.2	0.0487765	0.218282	5743	PTGS2
GO:0071543	diphosphoinositol polyphosphate metabolic process	biological_process	cellular process	1	172	5	17286	0.2	0.0487765	0.218282	55190	NUDT11
GO:0072012	glomerulus vasculature development	biological_process	developmental process	1	172	5	17286	0.2	0.0487765	0.218282	285	ANGPT2
GO:0072178	nephric duct morphogenesis	biological_process	developmental process	1	172	5	17286	0.2	0.0487765	0.218282	2045	EPHA7
GO:0072331	signal transduction by p53 class mediator	biological_process	biological regulation	1	172	5	17286	0.2	0.0487765	0.218282	1026	CDKN1A
GO:0090271	positive regulation of fibroblast growth factor production	biological_process	biological regulation	1	172	5	17286	0.2	0.0487765	0.218282	5743	PTGS2
GO:0098943	neurotransmitter receptor transport, postsynaptic endosome to lysosome	biological_process	localization	1	172	5	17286	0.2	0.0487765	0.218282	27092	CACNG4
GO:1900186	negative regulation of clathrin-dependent endocytosis	biological_process	cellular component organization or biogenesis	1	172	5	17286	0.2	0.0487765	0.218282	6457	SH3GL3
GO:1901843	positive regulation of high voltage-gated calcium channel activity	biological_process	biological regulation	1	172	5	17286	0.2	0.0487765	0.218282	781	CACNA2D1
GO:1901907	diadenosine pentaphosphate catabolic process	biological_process	cellular process	1	172	5	17286	0.2	0.0487765	0.218282	55190	NUDT11
GO:1901909	diadenosine hexaphosphate catabolic process	biological_process	metabolic process	1	172	5	17286	0.2	0.0487765	0.218282	55190	NUDT11
GO:1901911	adenosine 5'-(hexahydrogen pentaphosphate) catabolic process	biological_process	cellular process	1	172	5	17286	0.2	0.0487765	0.218282	55190	NUDT11
GO:1905007	positive regulation of epithelial to mesenchymal transition involved in endocardial cushion formation	biological_process	cellular process	1	172	5	17286	0.2	0.0487765	0.218282	7042	TGFB2
GO:1990776	response to angiotensin	biological_process	response to stimulus	1	172	5	17286	0.2	0.0487765	0.218282	5743	PTGS2
GO:0007507	heart development	biological_process	developmental process	6	172	264	17286	0.0227273	0.048778	0.218282	7.04234e+22	TGFB2,ID1,POLR2D,CDKN1A,PPARA,BMP2
GO:0000070	mitotic sister chromatid segregation	biological_process	cellular component organization or biogenesis	2	172	36	17286	0.0555556	0.0497322	0.220973	40859183	MAD2L1,ZW10
GO:0043392	negative regulation of DNA binding	biological_process	biological regulation	2	172	36	17286	0.0555556	0.0497322	0.220973	229273397	HABP4,ID1
GO:0048247	lymphocyte chemotaxis	biological_process	cellular process	2	172	37	17286	0.0540541	0.0522388	0.228062	62896288	SAA2,SAA1
GO:0043123	positive regulation of I-kappaB kinase/NF-kappaB signaling	biological_process	cellular process	5	172	203	17286	0.0246305	0.0524842	0.228062	8.44334e+23	CARD11,TICAM2,BIRC3,SLC20A1,TMEM189-UBE2V1
GO:0009314	response to radiation	biological_process	response to stimulus	2	172	38	17286	0.0526316	0.0547895	0.228062	2855743	ANGPT2,PTGS2
GO:0060412	ventricular septum morphogenesis	biological_process	multicellular organismal process	2	172	38	17286	0.0526316	0.0547895	0.228062	40927042	SMAD7,TGFB2
GO:0043066	negative regulation of apoptotic process	biological_process	cellular process	10	172	567	17286	0.0176367	0.057378	0.228062	4.08533e+37	MAD2L1,BIRC3,ANGPT2,ID1,PTGS2,TIAF1,SYNGAP1,CDKN1A,IL6ST,IL7
GO:0002360	T cell lineage commitment	biological_process	cellular process	1	172	6	17286	0.166667	0.0582442	0.228062	3574	IL7
GO:0002725	negative regulation of T cell cytokine production	biological_process	biological regulation	1	172	6	17286	0.166667	0.0582442	0.228062	4092	SMAD7
GO:0006525	arginine metabolic process	biological_process	cellular process	1	172	6	17286	0.166667	0.0582442	0.228062	23576	DDAH1
GO:0009750	response to fructose	biological_process	response to stimulus	1	172	6	17286	0.166667	0.0582442	0.228062	5743	PTGS2
GO:0019511	peptidyl-proline hydroxylation	biological_process	cellular process	1	172	6	17286	0.166667	0.0582442	0.228062	55214	P3H2
GO:0030578	PML body organization	biological_process	cellular component organization or biogenesis	1	172	6	17286	0.166667	0.0582442	0.228062	22927	HABP4
GO:0031064	negative regulation of histone deacetylation	biological_process	biological regulation	1	172	6	17286	0.166667	0.0582442	0.228062	55170	PRMT6
GO:0031622	positive regulation of fever generation	biological_process	regulation of biological process	1	172	6	17286	0.166667	0.0582442	0.228062	5743	PTGS2
GO:0033631	cell-cell adhesion mediated by integrin	biological_process	biological adhesion	1	172	6	17286	0.166667	0.0582442	0.228062	8754	ADAM9
GO:0035630	bone mineralization involved in bone maturation	biological_process	developmental process	1	172	6	17286	0.166667	0.0582442	0.228062	650	BMP2
GO:0035873	lactate transmembrane transport	biological_process	localization	1	172	6	17286	0.166667	0.0582442	0.228062	9123	SLC16A3
GO:0040036	regulation of fibroblast growth factor receptor signaling pathway	biological_process	biological regulation	1	172	6	17286	0.166667	0.0582442	0.228062	23213	SULF1
GO:0043569	negative regulation of insulin-like growth factor receptor signaling pathway	biological_process	biological regulation	1	172	6	17286	0.166667	0.0582442	0.228062	650	BMP2
GO:0043985	histone H4-R3 methylation	biological_process	metabolic process	1	172	6	17286	0.166667	0.0582442	0.228062	55170	PRMT6
GO:0045110	intermediate filament bundle assembly	biological_process	cellular process	1	172	6	17286	0.166667	0.0582442	0.228062	3861	KRT14
GO:0046321	positive regulation of fatty acid oxidation	biological_process	biological regulation	1	172	6	17286	0.166667	0.0582442	0.228062	5465	PPARA
GO:0048263	determination of dorsal identity	biological_process	developmental process	1	172	6	17286	0.166667	0.0582442	0.228062	100532736	MICOS10-NBL1
GO:0048562	embryonic organ morphogenesis	biological_process	developmental process	1	172	6	17286	0.166667	0.0582442	0.228062	5433	POLR2D
GO:0051572	negative regulation of histone H3-K4 methylation	biological_process	biological regulation	1	172	6	17286	0.166667	0.0582442	0.228062	55170	PRMT6
GO:0051891	positive regulation of cardioblast differentiation	biological_process	biological regulation	1	172	6	17286	0.166667	0.0582442	0.228062	7042	TGFB2
GO:0060373	regulation of ventricular cardiac muscle cell membrane depolarization	biological_process	biological regulation	1	172	6	17286	0.166667	0.0582442	0.228062	4092	SMAD7
GO:0060426	lung vasculature development	biological_process	developmental process	1	172	6	17286	0.166667	0.0582442	0.228062	3397	ID1
GO:0061041	regulation of wound healing	biological_process	biological regulation	1	172	6	17286	0.166667	0.0582442	0.228062	5328	PLAU
GO:0071650	negative regulation of chemokine (C-C motif) ligand 5 production	biological_process	biological regulation	1	172	6	17286	0.166667	0.0582442	0.228062	353376	TICAM2
GO:0090315	negative regulation of protein targeting to membrane	biological_process	biological regulation	1	172	6	17286	0.166667	0.0582442	0.228062	2664	GDI1
GO:0097327	response to antineoplastic agent	biological_process	response to stimulus	1	172	6	17286	0.166667	0.0582442	0.228062	8754	ADAM9
GO:0098957	anterograde axonal transport of mitochondrion	biological_process	localization	1	172	6	17286	0.166667	0.0582442	0.228062	9001	HAP1
GO:0099590	neurotransmitter receptor internalization	biological_process	localization	1	172	6	17286	0.166667	0.0582442	0.228062	27092	CACNG4
GO:1902219	negative regulation of intrinsic apoptotic signaling pathway in response to osmotic stress	biological_process	biological regulation	1	172	6	17286	0.166667	0.0582442	0.228062	5743	PTGS2
GO:1903038	negative regulation of leukocyte cell-cell adhesion	biological_process	biological adhesion	1	172	6	17286	0.166667	0.0582442	0.228062	5465	PPARA
GO:1990001	inhibition of cysteine-type endopeptidase activity involved in apoptotic process	biological_process	biological regulation	1	172	6	17286	0.166667	0.0582442	0.228062	330	BIRC3
GO:2000278	regulation of DNA biosynthetic process	biological_process	biological regulation	1	172	6	17286	0.166667	0.0582442	0.228062	1026	CDKN1A
GO:2000726	negative regulation of cardiac muscle cell differentiation	biological_process	biological regulation	1	172	6	17286	0.166667	0.0582442	0.228062	650	BMP2
GO:0048813	dendrite morphogenesis	biological_process	cellular component organization or biogenesis	2	172	40	17286	0.05	0.0600192	0.234281	1098854942	METAP2,ABITRAM
GO:0001942	hair follicle development	biological_process	developmental process	2	172	41	17286	0.0487805	0.0626961	0.241285	704211166	TGFB2,SOX21
GO:0043966	histone H3 acetylation	biological_process	cellular process	2	172	42	17286	0.047619	0.0654127	0.241285	799455689	KAT6A,YEATS2
GO:0048013	ephrin receptor signaling pathway	biological_process	biological regulation	3	172	94	17286	0.0319149	0.0673799	0.241285	1009588312045	ARPC1B,SYNGAP1,EPHA7
GO:0001844	protein insertion into mitochondrial membrane involved in apoptotic signaling pathway	biological_process	biological regulation	1	172	7	17286	0.142857	0.0676181	0.241285	90427	BMF
GO:0002821	positive regulation of adaptive immune response	biological_process	biological regulation	1	172	7	17286	0.142857	0.0676181	0.241285	3572	IL6ST
GO:0002934	desmosome organization	biological_process	cellular component organization or biogenesis	1	172	7	17286	0.142857	0.0676181	0.241285	64065	PERP
GO:0003100	regulation of systemic arterial blood pressure by endothelin	biological_process	multicellular organismal process	1	172	7	17286	0.142857	0.0676181	0.241285	1907	EDN2
GO:0003179	heart valve morphogenesis	biological_process	multicellular organismal process	1	172	7	17286	0.142857	0.0676181	0.241285	7042	TGFB2
GO:0006047	UDP-N-acetylglucosamine metabolic process	biological_process	cellular process	1	172	7	17286	0.142857	0.0676181	0.241285	9945	GFPT2
GO:0014029	neural crest formation	biological_process	cellular process	1	172	7	17286	0.142857	0.0676181	0.241285	9221	NOLC1
GO:0014909	smooth muscle cell migration	biological_process	cellular process	1	172	7	17286	0.142857	0.0676181	0.241285	5328	PLAU
GO:0018206	peptidyl-methionine modification	biological_process	cellular process	1	172	7	17286	0.142857	0.0676181	0.241285	10988	METAP2
GO:0021978	telencephalon regionalization	biological_process	developmental process	1	172	7	17286	0.142857	0.0676181	0.241285	650	BMP2
GO:0031394	positive regulation of prostaglandin biosynthetic process	biological_process	regulation of biological process	1	172	7	17286	0.142857	0.0676181	0.241285	5743	PTGS2
GO:0031587	positive regulation of inositol 1,4,5-trisphosphate-sensitive calcium-release channel activity	biological_process	biological regulation	1	172	7	17286	0.142857	0.0676181	0.241285	9001	HAP1
GO:0033615	mitochondrial proton-transporting ATP synthase complex assembly	biological_process	cellular component organization or biogenesis	1	172	7	17286	0.142857	0.0676181	0.241285	100996928	FMC1-LUC7L2
GO:0034121	regulation of toll-like receptor signaling pathway	biological_process	biological regulation	1	172	7	17286	0.142857	0.0676181	0.241285	330	BIRC3
GO:0035095	behavioral response to nicotine	biological_process	behavior	1	172	7	17286	0.142857	0.0676181	0.241285	5465	PPARA
GO:0038202	TORC1 signaling	biological_process	cellular process	1	172	7	17286	0.142857	0.0676181	0.241285	84433	CARD11
GO:0042487	regulation of odontogenesis of dentin-containing tooth	biological_process	biological regulation	1	172	7	17286	0.142857	0.0676181	0.241285	650	BMP2
GO:0045602	negative regulation of endothelial cell differentiation	biological_process	biological regulation	1	172	7	17286	0.142857	0.0676181	0.241285	3397	ID1
GO:0046033	AMP metabolic process	biological_process	cellular process	1	172	7	17286	0.142857	0.0676181	0.241285	50808	AK3
GO:0051964	negative regulation of synapse assembly	biological_process	biological regulation	1	172	7	17286	0.142857	0.0676181	0.241285	2045	EPHA7
GO:0060296	regulation of cilium beat frequency involved in ciliary motility	biological_process	biological regulation	1	172	7	17286	0.142857	0.0676181	0.241285	126731	CCSAP
GO:0060544	regulation of necroptotic process	biological_process	biological regulation	1	172	7	17286	0.142857	0.0676181	0.241285	330	BIRC3
GO:0060576	intestinal epithelial cell development	biological_process	cellular process	1	172	7	17286	0.142857	0.0676181	0.241285	56913	C1GALT1
GO:0070358	actin polymerization-dependent cell motility	biological_process	cellular process	1	172	7	17286	0.142857	0.0676181	0.241285	133746	JMY
GO:0090267	positive regulation of mitotic cell cycle spindle assembly checkpoint	biological_process	cellular component organization or biogenesis	1	172	7	17286	0.142857	0.0676181	0.241285	4085	MAD2L1
GO:1903659	regulation of complement-dependent cytotoxicity	biological_process	biological regulation	1	172	7	17286	0.142857	0.0676181	0.241285	7042	TGFB2
GO:0010718	positive regulation of epithelial to mesenchymal transition	biological_process	biological regulation	2	172	43	17286	0.0465116	0.0681683	0.241285	7042650	TGFB2,BMP2
GO:0030574	collagen catabolic process	biological_process	metabolic process	2	172	43	17286	0.0465116	0.0681683	0.241285	15141520	CTSL,CTSS
GO:1902895	positive regulation of pri-miRNA transcription by RNA polymerase II	biological_process	biological regulation	2	172	43	17286	0.0465116	0.0681683	0.241285	7042650	TGFB2,BMP2
GO:2001237	negative regulation of extrinsic apoptotic signaling pathway	biological_process	biological regulation	2	172	43	17286	0.0465116	0.0681683	0.241285	78573574	SCG2,IL7
GO:0045666	positive regulation of neuron differentiation	biological_process	developmental process	3	172	96	17286	0.03125	0.0708186	0.249697	6457100532736650	SH3GL3,MICOS10-NBL1,BMP2
GO:0048706	embryonic skeletal system development	biological_process	developmental process	2	172	44	17286	0.0454545	0.0709616	0.249697	543323213	POLR2D,SULF1
GO:0007155	cell adhesion	biological_process	biological adhesion	11	172	672	17286	0.016369	0.0727392	0.249697	1.09795e+49	FERMT2,PCDH18,GP1BB,ADAM9,PERP,NINJ1,CLDN23,COL18A1,VWF,COL12A1,IL32
GO:0001837	epithelial to mesenchymal transition	biological_process	cellular process	2	172	45	17286	0.0444444	0.0737917	0.249697	7042650	TGFB2,BMP2
GO:0001501	skeletal system development	biological_process	developmental process	4	172	159	17286	0.0251572	0.0745089	0.249697	704232064883650	TGFB2,HOXA10,NPR3,BMP2
GO:0001654	eye development	biological_process	developmental process	2	172	46	17286	0.0434783	0.0766575	0.249697	70425433	TGFB2,POLR2D
GO:0002224	toll-like receptor signaling pathway	biological_process	biological regulation	2	172	46	17286	0.0434783	0.0766575	0.249697	15141520	CTSL,CTSS
GO:0030282	bone mineralization	biological_process	developmental process	2	172	46	17286	0.0434783	0.0766575	0.249697	5743650	PTGS2,BMP2
GO:0045668	negative regulation of osteoblast differentiation	biological_process	biological regulation	2	172	46	17286	0.0434783	0.0766575	0.249697	3397169200	ID1,TMEM64
GO:0006029	proteoglycan metabolic process	biological_process	cellular process	1	172	8	17286	0.125	0.0768993	0.249697	650	BMP2
GO:0006323	DNA packaging	biological_process	cellular component organization or biogenesis	1	172	8	17286	0.125	0.0768993	0.249697	7994	KAT6A
GO:0007253	cytoplasmic sequestering of NF-kappaB	biological_process	biological regulation	1	172	8	17286	0.125	0.0768993	0.249697	9908	G3BP2
GO:0008611	ether lipid biosynthetic process	biological_process	metabolic process	1	172	8	17286	0.125	0.0768993	0.249697	387522	TMEM189-UBE2V1
GO:0009414	response to water deprivation	biological_process	response to stimulus	1	172	8	17286	0.125	0.0768993	0.249697	84918	LRP11
GO:0009437	carnitine metabolic process	biological_process	cellular process	1	172	8	17286	0.125	0.0768993	0.249697	6583	SLC22A4
GO:0017121	phospholipid scrambling	biological_process	biological regulation	1	172	8	17286	0.125	0.0768993	0.249697	57088	PLSCR4
GO:0031952	regulation of protein autophosphorylation	biological_process	biological regulation	1	172	8	17286	0.125	0.0768993	0.249697	2045	EPHA7
GO:0032287	peripheral nervous system myelin maintenance	biological_process	cellular component organization or biogenesis	1	172	8	17286	0.125	0.0768993	0.249697	57716	PRX
GO:0035246	peptidyl-arginine N-methylation	biological_process	metabolic process	1	172	8	17286	0.125	0.0768993	0.249697	55170	PRMT6
GO:0042048	olfactory behavior	biological_process	behavior	1	172	8	17286	0.125	0.0768993	0.249697	130507	UBR3
GO:0042117	monocyte activation	biological_process	cellular process	1	172	8	17286	0.125	0.0768993	0.249697	8754	ADAM9
GO:0045084	positive regulation of interleukin-12 biosynthetic process	biological_process	metabolic process	1	172	8	17286	0.125	0.0768993	0.249697	4050	LTB
GO:0045719	negative regulation of glycogen biosynthetic process	biological_process	biological regulation	1	172	8	17286	0.125	0.0768993	0.249697	2887	GRB10
GO:0060059	embryonic retina morphogenesis in camera-type eye	biological_process	developmental process	1	172	8	17286	0.125	0.0768993	0.249697	5433	POLR2D
GO:0071396	cellular response to lipid	biological_process	cellular process	1	172	8	17286	0.125	0.0768993	0.249697	5465	PPARA
GO:0071651	positive regulation of chemokine (C-C motif) ligand 5 production	biological_process	biological regulation	1	172	8	17286	0.125	0.0768993	0.249697	353376	TICAM2
GO:0090027	negative regulation of monocyte chemotaxis	biological_process	biological regulation	1	172	8	17286	0.125	0.0768993	0.249697	100532736	MICOS10-NBL1
GO:0098970	postsynaptic neurotransmitter receptor diffusion trapping	biological_process	localization	1	172	8	17286	0.125	0.0768993	0.249697	27092	CACNG4
GO:1902806	regulation of cell cycle G1/S phase transition	biological_process	biological regulation	1	172	8	17286	0.125	0.0768993	0.249697	1026	CDKN1A
GO:1990384	hyaloid vascular plexus regression	biological_process	developmental process	1	172	8	17286	0.125	0.0768993	0.249697	4814	NINJ1
GO:2001259	positive regulation of cation channel activity	biological_process	biological regulation	1	172	8	17286	0.125	0.0768993	0.249697	1520	CTSS
GO:0000278	mitotic cell cycle	biological_process	cellular process	4	172	161	17286	0.0248447	0.0772142	0.249697	9.22192e+16	NOLC1,ZW10,TUBB1,NEK4
GO:0016525	negative regulation of angiogenesis	biological_process	multicellular organismal process	3	172	100	17286	0.03	0.0779278	0.249697	704228523213	TGFB2,ANGPT2,SULF1
GO:0002062	chondrocyte differentiation	biological_process	cellular process	2	172	47	17286	0.0425532	0.0795582	0.249697	6660650	SOX5,BMP2
GO:0006953	acute-phase response	biological_process	response to stimulus	2	172	47	17286	0.0425532	0.0795582	0.249697	62896288	SAA2,SAA1
GO:0030199	collagen fibril organization	biological_process	cellular process	2	172	47	17286	0.0425532	0.0795582	0.249697	70421303	TGFB2,COL12A1
GO:0034198	cellular response to amino acid starvation	biological_process	cellular process	2	172	47	17286	0.0425532	0.0795582	0.249697	1547431026	BMT2,CDKN1A
GO:0043588	skin development	biological_process	developmental process	2	172	47	17286	0.0425532	0.0795582	0.249697	405011166	LTB,SOX21
GO:0045429	positive regulation of nitric oxide biosynthetic process	biological_process	cellular process	2	172	47	17286	0.0425532	0.0795582	0.249697	574323576	PTGS2,DDAH1
GO:0050714	positive regulation of protein secretion	biological_process	biological regulation	2	172	47	17286	0.0425532	0.0795582	0.249697	70428754	TGFB2,ADAM9
GO:0009887	animal organ morphogenesis	biological_process	developmental process	4	172	163	17286	0.0245399	0.0799684	0.249697	1.00533e+20	MICOS10-NBL1,COL18A1,IL7,BMP2
GO:0042127	regulation of cell proliferation	biological_process	regulation of biological process	5	172	232	17286	0.0215517	0.0823975	0.249697	2.4447e+18	FRK,TGFB2,CCND3,PTGS2,PLAU
GO:0120163	negative regulation of cold-induced thermogenesis	biological_process	biological regulation	2	172	48	17286	0.0416667	0.0824927	0.249697	33974883	ID1,NPR3
GO:0043065	positive regulation of apoptotic process	biological_process	biological regulation	7	172	377	17286	0.0185676	0.0831165	0.249697	5.74313e+31	PTGS2,JMY,RRP1B,EPHA7,BMF,BMP2,TOMM22
GO:0010862	positive regulation of pathway-restricted SMAD protein phosphorylation	biological_process	biological regulation	2	172	49	17286	0.0408163	0.0854601	0.249697	7042650	TGFB2,BMP2
GO:0019882	antigen processing and presentation	biological_process	immune system process	2	172	49	17286	0.0408163	0.0854601	0.249697	15141520	CTSL,CTSS
GO:0002544	chronic inflammatory response	biological_process	response to stimulus	1	172	9	17286	0.111111	0.0860886	0.249697	9536	PTGES
GO:0008366	axon ensheathment	biological_process	cellular process	1	172	9	17286	0.111111	0.0860886	0.249697	57716	PRX
GO:0009950	dorsal/ventral axis specification	biological_process	developmental process	1	172	9	17286	0.111111	0.0860886	0.249697	7473	WNT3
GO:0010226	response to lithium ion	biological_process	response to stimulus	1	172	9	17286	0.111111	0.0860886	0.249697	5743	PTGS2
GO:0010887	negative regulation of cholesterol storage	biological_process	biological regulation	1	172	9	17286	0.111111	0.0860886	0.249697	5465	PPARA
GO:0016051	carbohydrate biosynthetic process	biological_process	metabolic process	1	172	9	17286	0.111111	0.0860886	0.249697	113189	CHST14
GO:0018216	peptidyl-arginine methylation	biological_process	cellular process	1	172	9	17286	0.111111	0.0860886	0.249697	55170	PRMT6
GO:0019217	regulation of fatty acid metabolic process	biological_process	biological regulation	1	172	9	17286	0.111111	0.0860886	0.249697	5465	PPARA
GO:0032836	glomerular basement membrane development	biological_process	cellular component organization or biogenesis	1	172	9	17286	0.111111	0.0860886	0.249697	23213	SULF1
GO:0033555	multicellular organismal response to stress	biological_process	multicellular organismal process	1	172	9	17286	0.111111	0.0860886	0.249697	84918	LRP11
GO:0033622	integrin activation	biological_process	cellular component organization or biogenesis	1	172	9	17286	0.111111	0.0860886	0.249697	10979	FERMT2
GO:0034128	negative regulation of MyD88-independent toll-like receptor signaling pathway	biological_process	biological regulation	1	172	9	17286	0.111111	0.0860886	0.249697	353376	TICAM2
GO:0035860	glial cell-derived neurotrophic factor receptor signaling pathway	biological_process	biological regulation	1	172	9	17286	0.111111	0.0860886	0.249697	23213	SULF1
GO:0046755	viral budding	biological_process	multi-organism process	1	172	9	17286	0.111111	0.0860886	0.249697	51534	VTA1
GO:0046825	regulation of protein export from nucleus	biological_process	biological regulation	1	172	9	17286	0.111111	0.0860886	0.249697	5784	PTPN14
GO:0048644	muscle organ morphogenesis	biological_process	developmental process	1	172	9	17286	0.111111	0.0860886	0.249697	219537	SMTNL1
GO:0048671	negative regulation of collateral sprouting	biological_process	biological regulation	1	172	9	17286	0.111111	0.0860886	0.249697	2045	EPHA7
GO:0050774	negative regulation of dendrite morphogenesis	biological_process	biological regulation	1	172	9	17286	0.111111	0.0860886	0.249697	3397	ID1
GO:0051444	negative regulation of ubiquitin-protein transferase activity	biological_process	metabolic process	1	172	9	17286	0.111111	0.0860886	0.249697	4092	SMAD7
GO:0051660	establishment of centrosome localization	biological_process	localization	1	172	9	17286	0.111111	0.0860886	0.249697	4085	MAD2L1
GO:0060039	pericardium development	biological_process	developmental process	1	172	9	17286	0.111111	0.0860886	0.249697	650	BMP2
GO:0060075	regulation of resting membrane potential	biological_process	biological regulation	1	172	9	17286	0.111111	0.0860886	0.249697	8645	KCNK5
GO:0060323	head morphogenesis	biological_process	developmental process	1	172	9	17286	0.111111	0.0860886	0.249697	7473	WNT3
GO:0061469	regulation of type B pancreatic cell proliferation	biological_process	cell proliferation	1	172	9	17286	0.111111	0.0860886	0.249697	100996928	FMC1-LUC7L2
GO:0097094	craniofacial suture morphogenesis	biological_process	developmental process	1	172	9	17286	0.111111	0.0860886	0.249697	51715	RAB23
GO:0099170	postsynaptic modulation of chemical synaptic transmission	biological_process	biological regulation	1	172	9	17286	0.111111	0.0860886	0.249697	11346	SYNPO
GO:1901522	positive regulation of transcription from RNA polymerase II promoter involved in cellular response to chemical stimulus	biological_process	biological regulation	1	172	9	17286	0.111111	0.0860886	0.249697	650	BMP2
GO:1904888	cranial skeletal system development	biological_process	developmental process	1	172	9	17286	0.111111	0.0860886	0.249697	7042	TGFB2
GO:2000320	negative regulation of T-helper 17 cell differentiation	biological_process	biological adhesion	1	172	9	17286	0.111111	0.0860886	0.249697	4092	SMAD7
GO:2000562	negative regulation of CD4-positive, alpha-beta T cell proliferation	biological_process	biological adhesion	1	172	9	17286	0.111111	0.0860886	0.249697	64115	VSIR
GO:2000969	positive regulation of AMPA receptor activity	biological_process	biological regulation	1	172	9	17286	0.111111	0.0860886	0.249697	27092	CACNG4
GO:2001236	regulation of extrinsic apoptotic signaling pathway	biological_process	biological regulation	1	172	9	17286	0.111111	0.0860886	0.249697	64798	DEPTOR
GO:0061337	cardiac conduction	biological_process	biological regulation	2	172	50	17286	0.04	0.0884594	0.255981	27092781	CACNG4,CACNA2D1
GO:0007517	muscle organ development	biological_process	developmental process	3	172	106	17286	0.0283019	0.0891499	0.256493	6442687653339	SGCA,TAGLN,BTBD1
GO:0014823	response to activity	biological_process	response to stimulus	2	172	51	17286	0.0392157	0.0914898	0.256493	219537285	SMTNL1,ANGPT2
GO:0030514	negative regulation of BMP signaling pathway	biological_process	biological regulation	2	172	51	17286	0.0392157	0.0914898	0.256493	4092100532736	SMAD7,MICOS10-NBL1
GO:0043484	regulation of RNA splicing	biological_process	biological regulation	2	172	51	17286	0.0392157	0.0914898	0.256493	2307657716	RRP1B,PRX
GO:0045786	negative regulation of cell cycle	biological_process	biological regulation	2	172	51	17286	0.0392157	0.0914898	0.256493	5743650	PTGS2,BMP2
GO:0051603	proteolysis involved in cellular protein catabolic process	biological_process	cellular process	2	172	52	17286	0.0384615	0.0945502	0.256493	15141520	CTSL,CTSS
GO:0035335	peptidyl-tyrosine dephosphorylation	biological_process	cellular process	3	172	109	17286	0.0275229	0.0950015	0.256493	578457871846	PTPN14,PTPRB,DUSP4
GO:0001961	positive regulation of cytokine-mediated signaling pathway	biological_process	biological regulation	1	172	10	17286	0.1	0.095187	0.256493	3574	IL7
GO:0003094	glomerular filtration	biological_process	multicellular organismal process	1	172	10	17286	0.1	0.095187	0.256493	23213	SULF1
GO:0003149	membranous septum morphogenesis	biological_process	multicellular organismal process	1	172	10	17286	0.1	0.095187	0.256493	7042	TGFB2
GO:0007589	body fluid secretion	biological_process	biological regulation	1	172	10	17286	0.1	0.095187	0.256493	6583	SLC22A4
GO:0030157	pancreatic juice secretion	biological_process	biological regulation	1	172	10	17286	0.1	0.095187	0.256493	4883	NPR3
GO:0031915	positive regulation of synaptic plasticity	biological_process	signaling	1	172	10	17286	0.1	0.095187	0.256493	5743	PTGS2
GO:0032000	positive regulation of fatty acid beta-oxidation	biological_process	biological regulation	1	172	10	17286	0.1	0.095187	0.256493	5465	PPARA
GO:0038003	opioid receptor signaling pathway	biological_process	biological regulation	1	172	10	17286	0.1	0.095187	0.256493	11054	OGFR
GO:0038007	netrin-activated signaling pathway	biological_process	regulation of biological process	1	172	10	17286	0.1	0.095187	0.256493	90249	UNC5A
GO:0042306	regulation of protein import into nucleus	biological_process	biological regulation	1	172	10	17286	0.1	0.095187	0.256493	9221	NOLC1
GO:0043462	regulation of ATPase activity	biological_process	biological regulation	1	172	10	17286	0.1	0.095187	0.256493	169200	TMEM64
GO:0043534	blood vessel endothelial cell migration	biological_process	cellular process	1	172	10	17286	0.1	0.095187	0.256493	3397	ID1
GO:0045577	regulation of B cell differentiation	biological_process	cellular process	1	172	10	17286	0.1	0.095187	0.256493	84433	CARD11
GO:0045792	negative regulation of cell size	biological_process	biological regulation	1	172	10	17286	0.1	0.095187	0.256493	64798	DEPTOR
GO:0045823	positive regulation of heart contraction	biological_process	biological regulation	1	172	10	17286	0.1	0.095187	0.256493	7042	TGFB2
GO:0048103	somatic stem cell division	biological_process	cellular process	1	172	10	17286	0.1	0.095187	0.256493	7042	TGFB2
GO:0048311	mitochondrion distribution	biological_process	cellular component organization or biogenesis	1	172	10	17286	0.1	0.095187	0.256493	9001	HAP1
GO:0048762	mesenchymal cell differentiation	biological_process	cellular process	1	172	10	17286	0.1	0.095187	0.256493	650	BMP2
GO:0061180	mammary gland epithelium development	biological_process	developmental process	1	172	10	17286	0.1	0.095187	0.256493	7473	WNT3
GO:0061626	pharyngeal arch artery morphogenesis	biological_process	multicellular organismal process	1	172	10	17286	0.1	0.095187	0.256493	7042	TGFB2
GO:0071636	positive regulation of transforming growth factor beta production	biological_process	multicellular organismal process	1	172	10	17286	0.1	0.095187	0.256493	5743	PTGS2
GO:0072089	stem cell proliferation	biological_process	cell proliferation	1	172	10	17286	0.1	0.095187	0.256493	7473	WNT3
GO:1902514	regulation of calcium ion transmembrane transport via high voltage-gated calcium channel	biological_process	biological regulation	1	172	10	17286	0.1	0.095187	0.256493	781	CACNA2D1
GO:1902857	positive regulation of non-motile cilium assembly	biological_process	cellular component organization or biogenesis	1	172	10	17286	0.1	0.095187	0.256493	9001	HAP1
GO:1904903	ESCRT III complex disassembly	biological_process	cellular component organization or biogenesis	1	172	10	17286	0.1	0.095187	0.256493	51534	VTA1
GO:0008584	male gonad development	biological_process	developmental process	3	172	110	17286	0.0272727	0.0969864	0.257508	70424006293206	TGFB2,TEX19,HOXA10
GO:0016358	dendrite development	biological_process	cellular component organization or biogenesis	2	172	53	17286	0.0377358	0.0976399	0.257508	883110988	SYNGAP1,METAP2
GO:0032526	response to retinoic acid	biological_process	response to stimulus	2	172	53	17286	0.0377358	0.0976399	0.257508	95365433	PTGES,POLR2D
GO:0045747	positive regulation of Notch signaling pathway	biological_process	positive regulation of biological process	2	172	53	17286	0.0377358	0.0976399	0.257508	7042388677	TGFB2,NOTCH2NLA
GO:0006493	protein O-linked glycosylation	biological_process	metabolic process	2	172	54	17286	0.037037	0.100758	0.257508	5691311041	C1GALT1,B4GAT1
GO:0031648	protein destabilization	biological_process	biological regulation	2	172	54	17286	0.037037	0.100758	0.257508	3397650	ID1,BMP2
GO:0034446	substrate adhesion-dependent cell spreading	biological_process	biological adhesion	2	172	54	17286	0.037037	0.100758	0.257508	109799341	FERMT2,VAMP3
GO:0007599	hemostasis	biological_process	biological regulation	2	172	55	17286	0.0363636	0.103903	0.257508	74505328	VWF,PLAU
GO:0045600	positive regulation of fat cell differentiation	biological_process	biological regulation	2	172	55	17286	0.0363636	0.103903	0.257508	169200650	TMEM64,BMP2
GO:0002377	immunoglobulin production	biological_process	immune system process	1	172	11	17286	0.0909091	0.104195	0.257508	84433	CARD11
GO:0006048	UDP-N-acetylglucosamine biosynthetic process	biological_process	cellular process	1	172	11	17286	0.0909091	0.104195	0.257508	9945	GFPT2
GO:0006817	phosphate ion transport	biological_process	localization	1	172	11	17286	0.0909091	0.104195	0.257508	6574	SLC20A1
GO:0007435	salivary gland morphogenesis	biological_process	developmental process	1	172	11	17286	0.0909091	0.104195	0.257508	7042	TGFB2
GO:0008090	retrograde axonal transport	biological_process	cellular process	1	172	11	17286	0.0909091	0.104195	0.257508	9001	HAP1
GO:0009142	nucleoside triphosphate biosynthetic process	biological_process	cellular process	1	172	11	17286	0.0909091	0.104195	0.257508	50808	AK3
GO:0010944	negative regulation of transcription by competitive promoter binding	biological_process	cellular process	1	172	11	17286	0.0909091	0.104195	0.257508	4092	SMAD7
GO:0010950	positive regulation of endopeptidase activity	biological_process	biological regulation	1	172	11	17286	0.0909091	0.104195	0.257508	64115	VSIR
GO:0014824	artery smooth muscle contraction	biological_process	biological regulation	1	172	11	17286	0.0909091	0.104195	0.257508	1907	EDN2
GO:0014894	response to denervation involved in regulation of muscle adaptation	biological_process	biological regulation	1	172	11	17286	0.0909091	0.104195	0.257508	6442	SGCA
GO:0015695	organic cation transport	biological_process	localization	1	172	11	17286	0.0909091	0.104195	0.257508	6583	SLC22A4
GO:0030311	poly-N-acetyllactosamine biosynthetic process	biological_process	cellular process	1	172	11	17286	0.0909091	0.104195	0.257508	11041	B4GAT1
GO:0030728	ovulation	biological_process	multi-organism process	1	172	11	17286	0.0909091	0.104195	0.257508	5743	PTGS2
GO:0032099	negative regulation of appetite	biological_process	biological regulation	1	172	11	17286	0.0909091	0.104195	0.257508	5465	PPARA
GO:0032511	late endosome to vacuole transport via multivesicular body sorting pathway	biological_process	localization	1	172	11	17286	0.0909091	0.104195	0.257508	51534	VTA1
GO:0034144	negative regulation of toll-like receptor 4 signaling pathway	biological_process	biological regulation	1	172	11	17286	0.0909091	0.104195	0.257508	353376	TICAM2
GO:0034145	positive regulation of toll-like receptor 4 signaling pathway	biological_process	biological regulation	1	172	11	17286	0.0909091	0.104195	0.257508	353376	TICAM2
GO:0034629	cellular protein-containing complex localization	biological_process	localization	1	172	11	17286	0.0909091	0.104195	0.257508	4092	SMAD7
GO:0035493	SNARE complex assembly	biological_process	cellular component organization or biogenesis	1	172	11	17286	0.0909091	0.104195	0.257508	9341	VAMP3
GO:0042416	dopamine biosynthetic process	biological_process	metabolic process	1	172	11	17286	0.0909091	0.104195	0.257508	7042	TGFB2
GO:0043068	positive regulation of programmed cell death	biological_process	biological regulation	1	172	11	17286	0.0909091	0.104195	0.257508	1026	CDKN1A
GO:0043276	anoikis	biological_process	cellular process	1	172	11	17286	0.0909091	0.104195	0.257508	90427	BMF
GO:0046710	GDP metabolic process	biological_process	cellular process	1	172	11	17286	0.0909091	0.104195	0.257508	84433	CARD11
GO:0050778	positive regulation of immune response	biological_process	immune system process	1	172	11	17286	0.0909091	0.104195	0.257508	7042	TGFB2
GO:0050803	regulation of synapse structure or activity	biological_process	biological regulation	1	172	11	17286	0.0909091	0.104195	0.257508	8831	SYNGAP1
GO:0055064	chloride ion homeostasis	biological_process	biological regulation	1	172	11	17286	0.0909091	0.104195	0.257508	771	CA12
GO:0060068	vagina development	biological_process	developmental process	1	172	11	17286	0.0909091	0.104195	0.257508	5433	POLR2D
GO:0060174	limb bud formation	biological_process	developmental process	1	172	11	17286	0.0909091	0.104195	0.257508	7473	WNT3
GO:0070757	interleukin-35-mediated signaling pathway	biological_process	biological regulation	1	172	11	17286	0.0909091	0.104195	0.257508	3572	IL6ST
GO:0071493	cellular response to UV-B	biological_process	cellular process	1	172	11	17286	0.0909091	0.104195	0.257508	1026	CDKN1A
GO:0097186	amelogenesis	biological_process	developmental process	1	172	11	17286	0.0909091	0.104195	0.257508	64065	PERP
GO:0150077	regulation of neuroinflammatory response	biological_process	biological regulation	1	172	11	17286	0.0909091	0.104195	0.257508	5743	PTGS2
GO:1904667	negative regulation of ubiquitin protein ligase activity	biological_process	biological regulation	1	172	11	17286	0.0909091	0.104195	0.257508	4085	MAD2L1
GO:0030335	positive regulation of cell migration	biological_process	cellular process	5	172	251	17286	0.0199203	0.106008	0.261473	8.07813e+22	COL18A1,TCAF2,VSIR,PLAU,BMP2
GO:0008542	visual learning	biological_process	behavior	2	172	56	17286	0.0357143	0.107076	0.262555	113468831	SYNPO,SYNGAP1
GO:0031100	animal organ regeneration	biological_process	developmental process	2	172	56	17286	0.0357143	0.107076	0.262555	2851026	ANGPT2,CDKN1A
GO:0034644	cellular response to UV	biological_process	cellular process	2	172	56	17286	0.0357143	0.107076	0.262555	574390427	PTGS2,BMF
GO:0016311	dephosphorylation	biological_process	cellular process	4	172	182	17286	0.021978	0.10848	0.263443	5784578749071840	PTPN14,PTPRB,NT5E,DUSP4
GO:0010942	positive regulation of cell death	biological_process	cellular process	2	172	57	17286	0.0350877	0.110274	0.263443	57431026	PTGS2,CDKN1A
GO:0030326	embryonic limb morphogenesis	biological_process	developmental process	2	172	57	17286	0.0350877	0.110274	0.263443	70423206	TGFB2,HOXA10
GO:0043525	positive regulation of neuron apoptotic process	biological_process	biological regulation	2	172	57	17286	0.0350877	0.110274	0.263443	70422045	TGFB2,EPHA7
GO:0045785	positive regulation of cell adhesion	biological_process	biological adhesion	2	172	57	17286	0.0350877	0.110274	0.263443	62896288	SAA2,SAA1
GO:1903508	positive regulation of nucleic acid-templated transcription	biological_process	biological regulation	3	172	117	17286	0.025641	0.111342	0.263443	79943397133746	KAT6A,ID1,JMY
GO:0001946	lymphangiogenesis	biological_process	developmental process	1	172	12	17286	0.0833333	0.113114	0.263443	5784	PTPN14
GO:0006301	postreplication repair	biological_process	cellular process	1	172	12	17286	0.0833333	0.113114	0.263443	387522	TMEM189-UBE2V1
GO:0006527	arginine catabolic process	biological_process	cellular process	1	172	12	17286	0.0833333	0.113114	0.263443	23576	DDAH1
GO:0008347	glial cell migration	biological_process	localization	1	172	12	17286	0.0833333	0.113114	0.263443	7042	TGFB2
GO:0016056	rhodopsin mediated signaling pathway	biological_process	biological regulation	1	172	12	17286	0.0833333	0.113114	0.263443	9616	RNF7
GO:0030208	dermatan sulfate biosynthetic process	biological_process	metabolic process	1	172	12	17286	0.0833333	0.113114	0.263443	113189	CHST14
GO:0031639	plasminogen activation	biological_process	metabolic process	1	172	12	17286	0.0833333	0.113114	0.263443	5328	PLAU
GO:0032700	negative regulation of interleukin-17 production	biological_process	biological regulation	1	172	12	17286	0.0833333	0.113114	0.263443	64115	VSIR
GO:0034501	protein localization to kinetochore	biological_process	localization	1	172	12	17286	0.0833333	0.113114	0.263443	9183	ZW10
GO:0044237	cellular metabolic process	biological_process	cellular process	1	172	12	17286	0.0833333	0.113114	0.263443	5433	POLR2D
GO:0046037	GMP metabolic process	biological_process	cellular process	1	172	12	17286	0.0833333	0.113114	0.263443	84433	CARD11
GO:0046135	pyrimidine nucleoside catabolic process	biological_process	metabolic process	1	172	12	17286	0.0833333	0.113114	0.263443	4907	NT5E
GO:0051549	positive regulation of keratinocyte migration	biological_process	cellular process	1	172	12	17286	0.0833333	0.113114	0.263443	8754	ADAM9
GO:0051775	response to redox state	biological_process	response to stimulus	1	172	12	17286	0.0833333	0.113114	0.263443	9616	RNF7
GO:0061052	negative regulation of cell growth involved in cardiac muscle cell development	biological_process	response to stimulus	1	172	12	17286	0.0833333	0.113114	0.263443	5465	PPARA
GO:0070106	interleukin-27-mediated signaling pathway	biological_process	biological regulation	1	172	12	17286	0.0833333	0.113114	0.263443	3572	IL6ST
GO:0070166	enamel mineralization	biological_process	developmental process	1	172	12	17286	0.0833333	0.113114	0.263443	5465	PPARA
GO:0070213	protein auto-ADP-ribosylation	biological_process	metabolic process	1	172	12	17286	0.0833333	0.113114	0.263443	64761	PARP12
GO:0070286	axonemal dynein complex assembly	biological_process	cellular component organization or biogenesis	1	172	12	17286	0.0833333	0.113114	0.263443	6674	SPAG1
GO:0070863	positive regulation of protein exit from endoplasmic reticulum	biological_process	biological regulation	1	172	12	17286	0.0833333	0.113114	0.263443	161291	TMEM30B
GO:2001020	regulation of response to DNA damage stimulus	biological_process	cellular process	1	172	12	17286	0.0833333	0.113114	0.263443	6787	NEK4
GO:0030216	keratinocyte differentiation	biological_process	developmental process	2	172	59	17286	0.0338983	0.116744	0.268799	38688754	KRT16,ADAM9
GO:0008544	epidermis development	biological_process	developmental process	3	172	121	17286	0.0247934	0.11989	0.268799	386138525465	KRT14,KRT5,PPARA
GO:0006631	fatty acid metabolic process	biological_process	cellular process	4	172	189	17286	0.021164	0.119997	0.268799	5.74395e+17	PTGS2,PTGES,TMEM189-UBE2V1,PPARA
GO:0030178	negative regulation of Wnt signaling pathway	biological_process	biological regulation	2	172	60	17286	0.0333333	0.120014	0.268799	2887164284	GRB10,APCDD1L
GO:0048167	regulation of synaptic plasticity	biological_process	biological regulation	2	172	60	17286	0.0333333	0.120014	0.268799	92218831	NOLC1,SYNGAP1
GO:0048839	inner ear development	biological_process	developmental process	2	172	60	17286	0.0333333	0.120014	0.268799	7042650	TGFB2,BMP2
GO:0000288	nuclear-transcribed mRNA catabolic process, deadenylation-dependent decay	biological_process	biological regulation	1	172	13	17286	0.0769231	0.121945	0.268799	5433	POLR2D
GO:0002675	positive regulation of acute inflammatory response	biological_process	biological regulation	1	172	13	17286	0.0769231	0.121945	0.268799	3572	IL6ST
GO:0003215	cardiac right ventricle morphogenesis	biological_process	developmental process	1	172	13	17286	0.0769231	0.121945	0.268799	7042	TGFB2
GO:0006282	regulation of DNA repair	biological_process	cellular process	1	172	13	17286	0.0769231	0.121945	0.268799	387522	TMEM189-UBE2V1
GO:0007096	regulation of exit from mitosis	biological_process	biological regulation	1	172	13	17286	0.0769231	0.121945	0.268799	9183	ZW10
GO:0010717	regulation of epithelial to mesenchymal transition	biological_process	developmental process	1	172	13	17286	0.0769231	0.121945	0.268799	4092	SMAD7
GO:0010745	negative regulation of macrophage derived foam cell differentiation	biological_process	biological regulation	1	172	13	17286	0.0769231	0.121945	0.268799	5465	PPARA
GO:0033628	regulation of cell adhesion mediated by integrin	biological_process	biological adhesion	1	172	13	17286	0.0769231	0.121945	0.268799	5328	PLAU
GO:0033690	positive regulation of osteoblast proliferation	biological_process	biological regulation	1	172	13	17286	0.0769231	0.121945	0.268799	650	BMP2
GO:0034333	adherens junction assembly	biological_process	cellular component organization or biogenesis	1	172	13	17286	0.0769231	0.121945	0.268799	4092	SMAD7
GO:0035435	phosphate ion transmembrane transport	biological_process	localization	1	172	13	17286	0.0769231	0.121945	0.268799	6574	SLC20A1
GO:0042116	macrophage activation	biological_process	cellular process	1	172	13	17286	0.0769231	0.121945	0.268799	1907	EDN2
GO:0043281	regulation of cysteine-type endopeptidase activity involved in apoptotic process	biological_process	biological regulation	1	172	13	17286	0.0769231	0.121945	0.268799	2045	EPHA7
GO:0045116	protein neddylation	biological_process	cellular process	1	172	13	17286	0.0769231	0.121945	0.268799	9616	RNF7
GO:0045579	positive regulation of B cell differentiation	biological_process	biological regulation	1	172	13	17286	0.0769231	0.121945	0.268799	3574	IL7
GO:0045591	positive regulation of regulatory T cell differentiation	biological_process	biological adhesion	1	172	13	17286	0.0769231	0.121945	0.268799	64115	VSIR
GO:0046685	response to arsenic-containing substance	biological_process	response to stimulus	1	172	13	17286	0.0769231	0.121945	0.268799	1026	CDKN1A
GO:0046940	nucleoside monophosphate phosphorylation	biological_process	cellular process	1	172	13	17286	0.0769231	0.121945	0.268799	50808	AK3
GO:0048016	inositol phosphate-mediated signaling	biological_process	biological regulation	1	172	13	17286	0.0769231	0.121945	0.268799	1907	EDN2
GO:0060394	negative regulation of pathway-restricted SMAD protein phosphorylation	biological_process	biological regulation	1	172	13	17286	0.0769231	0.121945	0.268799	4092	SMAD7
GO:0060546	negative regulation of necroptotic process	biological_process	biological regulation	1	172	13	17286	0.0769231	0.121945	0.268799	330	BIRC3
GO:0071498	cellular response to fluid shear stress	biological_process	response to stimulus	1	172	13	17286	0.0769231	0.121945	0.268799	5743	PTGS2
GO:0071985	multivesicular body sorting pathway	biological_process	localization	1	172	13	17286	0.0769231	0.121945	0.268799	51534	VTA1
GO:2000369	regulation of clathrin-dependent endocytosis	biological_process	biological regulation	1	172	13	17286	0.0769231	0.121945	0.268799	6457	SH3GL3
GO:0007219	Notch signaling pathway	biological_process	cellular process	3	172	122	17286	0.0245902	0.122064	0.268799	64065388677650	PERP,NOTCH2NLA,BMP2
GO:0000079	regulation of cyclin-dependent protein serine/threonine kinase activity	biological_process	biological regulation	2	172	62	17286	0.0322581	0.126622	0.277078	8961026	CCND3,CDKN1A
GO:0009968	negative regulation of signal transduction	biological_process	biological regulation	2	172	62	17286	0.0322581	0.126622	0.277078	1028730837	RGS19,SOCS7
GO:0030336	negative regulation of cell migration	biological_process	locomotion	3	172	125	17286	0.024	0.128673	0.277078	4092386823213	SMAD7,KRT16,SULF1
GO:0016266	O-glycan processing	biological_process	cellular process	2	172	63	17286	0.031746	0.129959	0.277078	5691311041	C1GALT1,B4GAT1
GO:0016485	protein processing	biological_process	metabolic process	2	172	63	17286	0.031746	0.129959	0.277078	152010988	CTSS,METAP2
GO:0045669	positive regulation of osteoblast differentiation	biological_process	biological regulation	2	172	63	17286	0.031746	0.129959	0.277078	3572650	IL6ST,BMP2
GO:0009101	glycoprotein biosynthetic process	biological_process	metabolic process	1	172	14	17286	0.0714286	0.130689	0.277078	11041	B4GAT1
GO:0022407	regulation of cell-cell adhesion	biological_process	biological adhesion	1	172	14	17286	0.0714286	0.130689	0.277078	2045	EPHA7
GO:0031113	regulation of microtubule polymerization	biological_process	biological regulation	1	172	14	17286	0.0714286	0.130689	0.277078	10988	METAP2
GO:0032693	negative regulation of interleukin-10 production	biological_process	biological regulation	1	172	14	17286	0.0714286	0.130689	0.277078	64115	VSIR
GO:0033120	positive regulation of RNA splicing	biological_process	biological regulation	1	172	14	17286	0.0714286	0.130689	0.277078	22927	HABP4
GO:0034356	NAD biosynthesis via nicotinamide riboside salvage pathway	biological_process	cellular process	1	172	14	17286	0.0714286	0.130689	0.277078	5743	PTGS2
GO:0045086	positive regulation of interleukin-2 biosynthetic process	biological_process	cellular process	1	172	14	17286	0.0714286	0.130689	0.277078	84433	CARD11
GO:0045820	negative regulation of glycolytic process	biological_process	biological regulation	1	172	14	17286	0.0714286	0.130689	0.277078	5465	PPARA
GO:0046325	negative regulation of glucose import	biological_process	biological regulation	1	172	14	17286	0.0714286	0.130689	0.277078	2887	GRB10
GO:0046622	positive regulation of organ growth	biological_process	biological regulation	1	172	14	17286	0.0714286	0.130689	0.277078	3574	IL7
GO:0046626	regulation of insulin receptor signaling pathway	biological_process	cellular process	1	172	14	17286	0.0714286	0.130689	0.277078	896	CCND3
GO:0048009	insulin-like growth factor receptor signaling pathway	biological_process	biological regulation	1	172	14	17286	0.0714286	0.130689	0.277078	2887	GRB10
GO:0048699	generation of neurons	biological_process	cellular process	1	172	14	17286	0.0714286	0.130689	0.277078	7042	TGFB2
GO:0062009	secondary palate development	biological_process	developmental process	1	172	14	17286	0.0714286	0.130689	0.277078	7042	TGFB2
GO:0098962	regulation of postsynaptic neurotransmitter receptor activity	biological_process	regulation of biological process	1	172	14	17286	0.0714286	0.130689	0.277078	27092	CACNG4
GO:2000772	regulation of cellular senescence	biological_process	biological regulation	1	172	14	17286	0.0714286	0.130689	0.277078	6787	NEK4
GO:0051301	cell division	biological_process	cellular process	7	172	427	17286	0.0163934	0.134561	0.279808	4.0859e+29	MAD2L1,CCND3,ZW10,ARL8B,CCSAP,NEK4,CDK14
GO:0001822	kidney development	biological_process	multicellular organismal process	3	172	128	17286	0.0234375	0.135407	0.279808	70425691323213	TGFB2,C1GALT1,SULF1
GO:0022008	neurogenesis	biological_process	cellular process	2	172	65	17286	0.0307692	0.136691	0.279808	900153339	HAP1,BTBD1
GO:0001706	endoderm formation	biological_process	multicellular organismal process	1	172	15	17286	0.0666667	0.139346	0.279808	1846	DUSP4
GO:0001967	suckling behavior	biological_process	behavior	1	172	15	17286	0.0666667	0.139346	0.279808	130507	UBR3
GO:0002031	G protein-coupled receptor internalization	biological_process	biological regulation	1	172	15	17286	0.0666667	0.139346	0.279808	9616	RNF7
GO:0002526	acute inflammatory response	biological_process	response to stimulus	1	172	15	17286	0.0666667	0.139346	0.279808	9536	PTGES
GO:0002690	positive regulation of leukocyte chemotaxis	biological_process	biological regulation	1	172	15	17286	0.0666667	0.139346	0.279808	1907	EDN2
GO:0003407	neural retina development	biological_process	developmental process	1	172	15	17286	0.0666667	0.139346	0.279808	7042	TGFB2
GO:0006473	protein acetylation	biological_process	cellular process	1	172	15	17286	0.0666667	0.139346	0.279808	7994	KAT6A
GO:0006978	DNA damage response, signal transduction by p53 class mediator resulting in transcription of p21 class mediator	biological_process	biological regulation	1	172	15	17286	0.0666667	0.139346	0.279808	1026	CDKN1A
GO:0010447	response to acidic pH	biological_process	response to stimulus	1	172	15	17286	0.0666667	0.139346	0.279808	1520	CTSS
GO:0010954	positive regulation of protein processing	biological_process	biological regulation	1	172	15	17286	0.0666667	0.139346	0.279808	10440	TIMM17A
GO:0015718	monocarboxylic acid transport	biological_process	localization	1	172	15	17286	0.0666667	0.139346	0.279808	9123	SLC16A3
GO:0015908	fatty acid transport	biological_process	localization	1	172	15	17286	0.0666667	0.139346	0.279808	5465	PPARA
GO:0031115	negative regulation of microtubule polymerization	biological_process	biological regulation	1	172	15	17286	0.0666667	0.139346	0.279808	10988	METAP2
GO:0032230	positive regulation of synaptic transmission, GABAergic	biological_process	biological regulation	1	172	15	17286	0.0666667	0.139346	0.279808	9001	HAP1
GO:0034656	nucleobase-containing small molecule catabolic process	biological_process	cellular process	1	172	15	17286	0.0666667	0.139346	0.279808	57089	ENTPD7
GO:0035810	positive regulation of urine volume	biological_process	biological regulation	1	172	15	17286	0.0666667	0.139346	0.279808	4883	NPR3
GO:0042308	negative regulation of protein import into nucleus	biological_process	localization	1	172	15	17286	0.0666667	0.139346	0.279808	51715	RAB23
GO:0043116	negative regulation of vascular permeability	biological_process	biological regulation	1	172	15	17286	0.0666667	0.139346	0.279808	23576	DDAH1
GO:0045722	positive regulation of gluconeogenesis	biological_process	biological regulation	1	172	15	17286	0.0666667	0.139346	0.279808	5465	PPARA
GO:0050862	positive regulation of T cell receptor signaling pathway	biological_process	biological regulation	1	172	15	17286	0.0666667	0.139346	0.279808	84433	CARD11
GO:0051489	regulation of filopodium assembly	biological_process	biological regulation	1	172	15	17286	0.0666667	0.139346	0.279808	54942	ABITRAM
GO:0055008	cardiac muscle tissue morphogenesis	biological_process	developmental process	1	172	15	17286	0.0666667	0.139346	0.279808	650	BMP2
GO:0060038	cardiac muscle cell proliferation	biological_process	developmental process	1	172	15	17286	0.0666667	0.139346	0.279808	7042	TGFB2
GO:0060402	calcium ion transport into cytosol	biological_process	biological regulation	1	172	15	17286	0.0666667	0.139346	0.279808	781	CACNA2D1
GO:0060413	atrial septum morphogenesis	biological_process	multicellular organismal process	1	172	15	17286	0.0666667	0.139346	0.279808	7042	TGFB2
GO:0090399	replicative senescence	biological_process	cellular process	1	172	15	17286	0.0666667	0.139346	0.279808	1026	CDKN1A
GO:0097202	activation of cysteine-type endopeptidase activity	biological_process	biological regulation	1	172	15	17286	0.0666667	0.139346	0.279808	64065	PERP
GO:0097623	potassium ion export across plasma membrane	biological_process	cellular process	1	172	15	17286	0.0666667	0.139346	0.279808	8645	KCNK5
GO:1903351	cellular response to dopamine	biological_process	cellular process	1	172	15	17286	0.0666667	0.139346	0.279808	3397	ID1
GO:2000279	negative regulation of DNA biosynthetic process	biological_process	biological regulation	1	172	15	17286	0.0666667	0.139346	0.279808	1026	CDKN1A
GO:0032922	circadian regulation of gene expression	biological_process	biological regulation	2	172	67	17286	0.0298507	0.143499	0.287228	33975465	ID1,PPARA
GO:0042102	positive regulation of T cell proliferation	biological_process	biological adhesion	2	172	67	17286	0.0298507	0.143499	0.287228	844333572	CARD11,IL6ST
GO:0007596	blood coagulation	biological_process	multicellular organismal process	4	172	204	17286	0.0196078	0.14634	0.287348	2.81251e+16	GP1BB,AK3,VWF,PLAU
GO:0009612	response to mechanical stimulus	biological_process	response to stimulus	2	172	68	17286	0.0294118	0.14693	0.287348	28584918	ANGPT2,LRP11
GO:0030154	cell differentiation	biological_process	cellular process	14	172	1031	17286	0.013579	0.147342	0.287348	2.44457e+64	FRK,C1GALT1,ELK4,ANGPT2,TEX19,ID1,NOTCH2NLA,TMEM189-UBE2V1,SOX21,PPARA,RMDN3,NDRG2,BTBD1,BMP2
GO:0001818	negative regulation of cytokine production	biological_process	biological regulation	1	172	16	17286	0.0625	0.147917	0.287348	57447	NDRG2
GO:0001921	positive regulation of receptor recycling	biological_process	biological regulation	1	172	16	17286	0.0625	0.147917	0.287348	9341	VAMP3
GO:0003184	pulmonary valve morphogenesis	biological_process	developmental process	1	172	16	17286	0.0625	0.147917	0.287348	7042	TGFB2
GO:0006002	fructose 6-phosphate metabolic process	biological_process	cellular process	1	172	16	17286	0.0625	0.147917	0.287348	9945	GFPT2
GO:0006112	energy reserve metabolic process	biological_process	metabolic process	1	172	16	17286	0.0625	0.147917	0.287348	9945	GFPT2
GO:0006388	tRNA splicing, via endonucleolytic cleavage and ligation	biological_process	cellular process	1	172	16	17286	0.0625	0.147917	0.287348	283989	TSEN54
GO:0019372	lipoxygenase pathway	biological_process	metabolic process	1	172	16	17286	0.0625	0.147917	0.287348	5743	PTGS2
GO:0019674	NAD metabolic process	biological_process	cellular process	1	172	16	17286	0.0625	0.147917	0.287348	4907	NT5E
GO:0032743	positive regulation of interleukin-2 production	biological_process	multicellular organismal process	1	172	16	17286	0.0625	0.147917	0.287348	84433	CARD11
GO:0034453	microtubule anchoring	biological_process	cellular component organization or biogenesis	1	172	16	17286	0.0625	0.147917	0.287348	123811	CEP20
GO:0043252	sodium-independent organic anion transport	biological_process	localization	1	172	16	17286	0.0625	0.147917	0.287348	6578	SLCO2A1
GO:0045580	regulation of T cell differentiation	biological_process	cellular process	1	172	16	17286	0.0625	0.147917	0.287348	84433	CARD11
GO:0055093	response to hyperoxia	biological_process	response to stimulus	1	172	16	17286	0.0625	0.147917	0.287348	1026	CDKN1A
GO:0060347	heart trabecula formation	biological_process	developmental process	1	172	16	17286	0.0625	0.147917	0.287348	5433	POLR2D
GO:0098703	calcium ion import across plasma membrane	biological_process	biological regulation	1	172	16	17286	0.0625	0.147917	0.287348	781	CACNA2D1
GO:1902894	negative regulation of pri-miRNA transcription by RNA polymerase II	biological_process	biological regulation	1	172	16	17286	0.0625	0.147917	0.287348	5465	PPARA
GO:0007200	phospholipase C-activating G protein-coupled receptor signaling pathway	biological_process	biological regulation	2	172	69	17286	0.0289855	0.150377	0.291225	551074883	ANO1,NPR3
GO:0008217	regulation of blood pressure	biological_process	biological regulation	2	172	69	17286	0.0289855	0.150377	0.291225	57434883	PTGS2,NPR3
GO:0032482	Rab protein signal transduction	biological_process	cellular process	2	172	70	17286	0.0285714	0.153841	0.291627	266451715	GDI1,RAB23
GO:0060395	SMAD protein signal transduction	biological_process	biological regulation	2	172	70	17286	0.0285714	0.153841	0.291627	7042650	TGFB2,BMP2
GO:0007050	cell cycle arrest	biological_process	biological regulation	3	172	137	17286	0.0218978	0.1563	0.291627	70421337461026	TGFB2,JMY,CDKN1A
GO:0003222	ventricular trabecula myocardium morphogenesis	biological_process	developmental process	1	172	17	17286	0.0588235	0.156403	0.291627	7042	TGFB2
GO:0003429	growth plate cartilage chondrocyte morphogenesis	biological_process	cellular component organization or biogenesis	1	172	17	17286	0.0588235	0.156403	0.291627	1303	COL12A1
GO:0006195	purine nucleotide catabolic process	biological_process	cellular process	1	172	17	17286	0.0588235	0.156403	0.291627	4907	NT5E
GO:0006491	N-glycan processing	biological_process	cellular process	1	172	17	17286	0.0588235	0.156403	0.291627	23193	GANAB
GO:0009948	anterior/posterior axis specification	biological_process	developmental process	1	172	17	17286	0.0588235	0.156403	0.291627	7473	WNT3
GO:0030277	maintenance of gastrointestinal epithelium	biological_process	biological regulation	1	172	17	17286	0.0588235	0.156403	0.291627	5433	POLR2D
GO:0030322	stabilization of membrane potential	biological_process	biological regulation	1	172	17	17286	0.0588235	0.156403	0.291627	8645	KCNK5
GO:0030949	positive regulation of vascular endothelial growth factor receptor signaling pathway	biological_process	biological regulation	1	172	17	17286	0.0588235	0.156403	0.291627	2887	GRB10
GO:0031167	rRNA methylation	biological_process	cellular component organization or biogenesis	1	172	17	17286	0.0588235	0.156403	0.291627	154743	BMT2
GO:0040037	negative regulation of fibroblast growth factor receptor signaling pathway	biological_process	biological regulation	1	172	17	17286	0.0588235	0.156403	0.291627	23213	SULF1
GO:0043923	positive regulation by host of viral transcription	biological_process	biological regulation	1	172	17	17286	0.0588235	0.156403	0.291627	23076	RRP1B
GO:0045616	regulation of keratinocyte differentiation	biological_process	biological regulation	1	172	17	17286	0.0588235	0.156403	0.291627	1514	CTSL
GO:0050930	induction of positive chemotaxis	biological_process	biological regulation	1	172	17	17286	0.0588235	0.156403	0.291627	7857	SCG2
GO:0051044	positive regulation of membrane protein ectodomain proteolysis	biological_process	cellular process	1	172	17	17286	0.0588235	0.156403	0.291627	8754	ADAM9
GO:0051926	negative regulation of calcium ion transport	biological_process	biological regulation	1	172	17	17286	0.0588235	0.156403	0.291627	5743	PTGS2
GO:0060044	negative regulation of cardiac muscle cell proliferation	biological_process	biological regulation	1	172	17	17286	0.0588235	0.156403	0.291627	5433	POLR2D
GO:0070050	neuron cellular homeostasis	biological_process	biological regulation	1	172	17	17286	0.0588235	0.156403	0.291627	1134	CHRNA1
GO:0070102	interleukin-6-mediated signaling pathway	biological_process	biological regulation	1	172	17	17286	0.0588235	0.156403	0.291627	3572	IL6ST
GO:0086002	cardiac muscle cell action potential involved in contraction	biological_process	biological regulation	1	172	17	17286	0.0588235	0.156403	0.291627	781	CACNA2D1
GO:0097502	mannosylation	biological_process	metabolic process	1	172	17	17286	0.0588235	0.156403	0.291627	85365	ALG2
GO:1902430	negative regulation of amyloid-beta formation	biological_process	negative regulation of biological process	1	172	17	17286	0.0588235	0.156403	0.291627	9001	HAP1
GO:1903827	regulation of cellular protein localization	biological_process	biological regulation	1	172	17	17286	0.0588235	0.156403	0.291627	10988	METAP2
GO:0022617	extracellular matrix disassembly	biological_process	cellular component organization or biogenesis	2	172	71	17286	0.028169	0.15732	0.292466	15141520	CTSL,CTSS
GO:0042795	snRNA transcription by RNA polymerase II	biological_process	cellular process	2	172	71	17286	0.028169	0.15732	0.292466	543322936	POLR2D,ELL2
GO:0006633	fatty acid biosynthetic process	biological_process	cellular process	2	172	72	17286	0.0277778	0.160814	0.298519	57439536	PTGS2,PTGES
GO:0007420	brain development	biological_process	developmental process	5	172	289	17286	0.017301	0.161835	0.299969	5.04955e+20	PAFAH1B2,PCDH18,ID1,HAP1,EPHA7
GO:0003073	regulation of systemic arterial blood pressure	biological_process	multicellular organismal process	1	172	18	17286	0.0555556	0.164805	0.300147	23576	DDAH1
GO:0010801	negative regulation of peptidyl-threonine phosphorylation	biological_process	cellular process	1	172	18	17286	0.0555556	0.164805	0.300147	4092	SMAD7
GO:0019226	transmission of nerve impulse	biological_process	cellular process	1	172	18	17286	0.0555556	0.164805	0.300147	27092	CACNG4
GO:0021954	central nervous system neuron development	biological_process	cellular process	1	172	18	17286	0.0555556	0.164805	0.300147	10988	METAP2
GO:0047496	vesicle transport along microtubule	biological_process	cellular process	1	172	18	17286	0.0555556	0.164805	0.300147	9001	HAP1
GO:0048646	anatomical structure formation involved in morphogenesis	biological_process	developmental process	1	172	18	17286	0.0555556	0.164805	0.300147	7473	WNT3
GO:0050965	detection of temperature stimulus involved in sensory perception of pain	biological_process	multicellular organismal process	1	172	18	17286	0.0555556	0.164805	0.300147	55107	ANO1
GO:0050995	negative regulation of lipid catabolic process	biological_process	metabolic process	1	172	18	17286	0.0555556	0.164805	0.300147	100996928	FMC1-LUC7L2
GO:0051642	centrosome localization	biological_process	localization	1	172	18	17286	0.0555556	0.164805	0.300147	23299	BICD2
GO:0090336	positive regulation of brown fat cell differentiation	biological_process	biological regulation	1	172	18	17286	0.0555556	0.164805	0.300147	5743	PTGS2
GO:1904262	negative regulation of TORC1 signaling	biological_process	regulation of biological process	1	172	18	17286	0.0555556	0.164805	0.300147	154743	BMT2
GO:1904706	negative regulation of vascular smooth muscle cell proliferation	biological_process	biological regulation	1	172	18	17286	0.0555556	0.164805	0.300147	1026	CDKN1A
GO:1901796	regulation of signal transduction by p53 class mediator	biological_process	biological regulation	3	172	141	17286	0.0212766	0.165892	0.301687	799413374655170	KAT6A,JMY,PRMT6
GO:0045892	negative regulation of transcription, DNA-templated	biological_process	biological regulation	9	172	621	17286	0.0144928	0.167105	0.303453	7.99456e+39	KAT6A,YEATS2,SMTNL1,RBAK,ID1,PPARA,SOX5,BMP2,PRMT6
GO:0070373	negative regulation of ERK1 and ERK2 cascade	biological_process	biological regulation	2	172	74	17286	0.027027	0.167844	0.303915	574471846	NDRG2,DUSP4
GO:0071363	cellular response to growth factor stimulus	biological_process	cellular process	2	172	74	17286	0.027027	0.167844	0.303915	285650	ANGPT2,BMP2
GO:0043433	negative regulation of DNA-binding transcription factor activity	biological_process	biological regulation	2	172	75	17286	0.0266667	0.171379	0.306824	40923397	SMAD7,ID1
GO:0010469	regulation of signaling receptor activity	biological_process	cellular process	1	172	19	17286	0.0526316	0.173124	0.306824	5328	PLAU
GO:0010812	negative regulation of cell-substrate adhesion	biological_process	biological regulation	1	172	19	17286	0.0526316	0.173124	0.306824	285	ANGPT2
GO:0030150	protein import into mitochondrial matrix	biological_process	cellular component organization or biogenesis	1	172	19	17286	0.0526316	0.173124	0.306824	10440	TIMM17A
GO:0031638	zymogen activation	biological_process	metabolic process	1	172	19	17286	0.0526316	0.173124	0.306824	64115	VSIR
GO:0031668	cellular response to extracellular stimulus	biological_process	cellular process	1	172	19	17286	0.0526316	0.173124	0.306824	1026	CDKN1A
GO:0034329	cell junction assembly	biological_process	cellular process	1	172	19	17286	0.0526316	0.173124	0.306824	10979	FERMT2
GO:0035269	protein O-linked mannosylation	biological_process	cellular process	1	172	19	17286	0.0526316	0.173124	0.306824	11041	B4GAT1
GO:0042310	vasoconstriction	biological_process	biological regulation	1	172	19	17286	0.0526316	0.173124	0.306824	1907	EDN2
GO:0043551	regulation of phosphatidylinositol 3-kinase activity	biological_process	biological regulation	1	172	19	17286	0.0526316	0.173124	0.306824	30837	SOCS7
GO:0048535	lymph node development	biological_process	developmental process	1	172	19	17286	0.0526316	0.173124	0.306824	4050	LTB
GO:0048566	embryonic digestive tract development	biological_process	developmental process	1	172	19	17286	0.0526316	0.173124	0.306824	7042	TGFB2
GO:0051492	regulation of stress fiber assembly	biological_process	biological regulation	1	172	19	17286	0.0526316	0.173124	0.306824	11346	SYNPO
GO:0071318	cellular response to ATP	biological_process	cellular process	1	172	19	17286	0.0526316	0.173124	0.306824	5743	PTGS2
GO:2000353	positive regulation of endothelial cell apoptotic process	biological_process	biological regulation	1	172	19	17286	0.0526316	0.173124	0.306824	80781	COL18A1
GO:0006368	transcription elongation from RNA polymerase II promoter	biological_process	cellular process	2	172	76	17286	0.0263158	0.174926	0.30958	543322936	POLR2D,ELL2
GO:0030855	epithelial cell differentiation	biological_process	cellular process	2	172	77	17286	0.025974	0.178485	0.314209	38616876	KRT14,TAGLN
GO:0001953	negative regulation of cell-matrix adhesion	biological_process	biological adhesion	1	172	20	17286	0.05	0.181361	0.314209	8831	SYNGAP1
GO:0002063	chondrocyte development	biological_process	developmental process	1	172	20	17286	0.05	0.181361	0.314209	23213	SULF1
GO:0006163	purine nucleotide metabolic process	biological_process	cellular process	1	172	20	17286	0.05	0.181361	0.314209	50808	AK3
GO:0010529	negative regulation of transposition	biological_process	biological regulation	1	172	20	17286	0.05	0.181361	0.314209	400629	TEX19
GO:0010821	regulation of mitochondrion organization	biological_process	cellular component organization or biogenesis	1	172	20	17286	0.05	0.181361	0.314209	55170	PRMT6
GO:0031290	retinal ganglion cell axon guidance	biological_process	cellular component organization or biogenesis	1	172	20	17286	0.05	0.181361	0.314209	2045	EPHA7
GO:0033280	response to vitamin D	biological_process	response to stimulus	1	172	20	17286	0.05	0.181361	0.314209	5743	PTGS2
GO:0034063	stress granule assembly	biological_process	cellular component organization or biogenesis	1	172	20	17286	0.05	0.181361	0.314209	9908	G3BP2
GO:0045862	positive regulation of proteolysis	biological_process	biological regulation	1	172	20	17286	0.05	0.181361	0.314209	64065	PERP
GO:0045995	regulation of embryonic development	biological_process	biological regulation	1	172	20	17286	0.05	0.181361	0.314209	126731	CCSAP
GO:0051412	response to corticosterone	biological_process	response to stimulus	1	172	20	17286	0.05	0.181361	0.314209	1026	CDKN1A
GO:0060307	regulation of ventricular cardiac muscle cell membrane repolarization	biological_process	biological regulation	1	172	20	17286	0.05	0.181361	0.314209	781	CACNA2D1
GO:0070932	histone H3 deacetylation	biological_process	cellular component organization or biogenesis	1	172	20	17286	0.05	0.181361	0.314209	2005	ELK4
GO:0071850	mitotic cell cycle arrest	biological_process	biological regulation	1	172	20	17286	0.05	0.181361	0.314209	1026	CDKN1A
GO:0006812	cation transport	biological_process	localization	2	172	78	17286	0.025641	0.182055	0.314209	551071134	ANO1,CHRNA1
GO:0006909	phagocytosis	biological_process	localization	2	172	78	17286	0.025641	0.182055	0.314209	35337623184	TICAM2,MESD
GO:0031398	positive regulation of protein ubiquitination	biological_process	biological regulation	2	172	78	17286	0.025641	0.182055	0.314209	4092330	SMAD7,BIRC3
GO:0009611	response to wounding	biological_process	response to stimulus	2	172	80	17286	0.025	0.189227	0.321331	70427450	TGFB2,VWF
GO:0098655	cation transmembrane transport	biological_process	localization	2	172	80	17286	0.025	0.189227	0.321331	658355107	SLC22A4,ANO1
GO:0010165	response to X-ray	biological_process	response to stimulus	1	172	21	17286	0.047619	0.189516	0.321331	1026	CDKN1A
GO:0010460	positive regulation of heart rate	biological_process	biological regulation	1	172	21	17286	0.047619	0.189516	0.321331	1907	EDN2
GO:0016338	calcium-independent cell-cell adhesion via plasma membrane cell-adhesion molecules	biological_process	biological adhesion	1	172	21	17286	0.047619	0.189516	0.321331	137075	CLDN23
GO:0022409	positive regulation of cell-cell adhesion	biological_process	biological regulation	1	172	21	17286	0.047619	0.189516	0.321331	4092	SMAD7
GO:0032332	positive regulation of chondrocyte differentiation	biological_process	biological regulation	1	172	21	17286	0.047619	0.189516	0.321331	6660	SOX5
GO:0032874	positive regulation of stress-activated MAPK cascade	biological_process	biological regulation	1	172	21	17286	0.047619	0.189516	0.321331	7042	TGFB2
GO:0033627	cell adhesion mediated by integrin	biological_process	biological adhesion	1	172	21	17286	0.047619	0.189516	0.321331	8754	ADAM9
GO:0034142	toll-like receptor 4 signaling pathway	biological_process	biological regulation	1	172	21	17286	0.047619	0.189516	0.321331	353376	TICAM2
GO:0035970	peptidyl-threonine dephosphorylation	biological_process	metabolic process	1	172	21	17286	0.047619	0.189516	0.321331	1846	DUSP4
GO:0060384	innervation	biological_process	developmental process	1	172	21	17286	0.047619	0.189516	0.321331	23213	SULF1
GO:0072657	protein localization to membrane	biological_process	localization	1	172	21	17286	0.047619	0.189516	0.321331	10979	FERMT2
GO:0032868	response to insulin	biological_process	response to stimulus	2	172	81	17286	0.0246914	0.192828	0.326504	28875465	GRB10,PPARA
GO:0001938	positive regulation of endothelial cell proliferation	biological_process	biological regulation	2	172	82	17286	0.0243902	0.196437	0.326624	7857650	SCG2,BMP2
GO:0040008	regulation of growth	biological_process	biological regulation	2	172	82	17286	0.0243902	0.196437	0.326624	3083711054	SOCS7,OGFR
GO:0006376	mRNA splice site selection	biological_process	cellular component organization or biogenesis	1	172	22	17286	0.0454545	0.197591	0.326624	100996928	FMC1-LUC7L2
GO:0006970	response to osmotic stress	biological_process	response to stimulus	1	172	22	17286	0.0454545	0.197591	0.326624	9221	NOLC1
GO:0007095	mitotic G2 DNA damage checkpoint	biological_process	biological regulation	1	172	22	17286	0.0454545	0.197591	0.326624	1026	CDKN1A
GO:0008593	regulation of Notch signaling pathway	biological_process	biological regulation	1	172	22	17286	0.0454545	0.197591	0.326624	3572	IL6ST
GO:0032722	positive regulation of chemokine production	biological_process	biological regulation	1	172	22	17286	0.0454545	0.197591	0.326624	3574	IL7
GO:0034067	protein localization to Golgi apparatus	biological_process	localization	1	172	22	17286	0.0454545	0.197591	0.326624	23299	BICD2
GO:0042730	fibrinolysis	biological_process	multicellular organismal process	1	172	22	17286	0.0454545	0.197591	0.326624	5328	PLAU
GO:0045582	positive regulation of T cell differentiation	biological_process	biological adhesion	1	172	22	17286	0.0454545	0.197591	0.326624	3574	IL7
GO:0045780	positive regulation of bone resorption	biological_process	biological regulation	1	172	22	17286	0.0454545	0.197591	0.326624	169200	TMEM64
GO:0048245	eosinophil chemotaxis	biological_process	cellular process	1	172	22	17286	0.0454545	0.197591	0.326624	7857	SCG2
GO:0051899	membrane depolarization	biological_process	biological regulation	1	172	22	17286	0.0454545	0.197591	0.326624	27092	CACNG4
GO:0060425	lung morphogenesis	biological_process	developmental process	1	172	22	17286	0.0454545	0.197591	0.326624	3397	ID1
GO:0070266	necroptotic process	biological_process	cellular process	1	172	22	17286	0.0454545	0.197591	0.326624	353376	TICAM2
GO:0099175	regulation of postsynapse organization	biological_process	biological regulation	1	172	22	17286	0.0454545	0.197591	0.326624	2045	EPHA7
GO:1903506	regulation of nucleic acid-templated transcription	biological_process	biological regulation	1	172	22	17286	0.0454545	0.197591	0.326624	5784	PTPN14
GO:1904886	beta-catenin destruction complex disassembly	biological_process	biological regulation	1	172	22	17286	0.0454545	0.197591	0.326624	23401	FRAT2
GO:0034765	regulation of ion transmembrane transport	biological_process	biological regulation	3	172	156	17286	0.0192308	0.203266	0.333676	270928645781	CACNG4,KCNK5,CACNA2D1
GO:0001502	cartilage condensation	biological_process	cell aggregation	1	172	23	17286	0.0434783	0.205585	0.333676	6660	SOX5
GO:0006509	membrane protein ectodomain proteolysis	biological_process	metabolic process	1	172	23	17286	0.0434783	0.205585	0.333676	8754	ADAM9
GO:0006541	glutamine metabolic process	biological_process	metabolic process	1	172	23	17286	0.0434783	0.205585	0.333676	9945	GFPT2
GO:0016571	histone methylation	biological_process	cellular component organization or biogenesis	1	172	23	17286	0.0434783	0.205585	0.333676	55170	PRMT6
GO:0030279	negative regulation of ossification	biological_process	biological regulation	1	172	23	17286	0.0434783	0.205585	0.333676	4092	SMAD7
GO:0042098	T cell proliferation	biological_process	immune system process	1	172	23	17286	0.0434783	0.205585	0.333676	896	CCND3
GO:0044772	mitotic cell cycle phase transition	biological_process	cellular process	1	172	23	17286	0.0434783	0.205585	0.333676	896	CCND3
GO:0045216	cell-cell junction organization	biological_process	cellular process	1	172	23	17286	0.0434783	0.205585	0.333676	7042	TGFB2
GO:0045672	positive regulation of osteoclast differentiation	biological_process	biological regulation	1	172	23	17286	0.0434783	0.205585	0.333676	169200	TMEM64
GO:0046716	muscle cell cellular homeostasis	biological_process	biological regulation	1	172	23	17286	0.0434783	0.205585	0.333676	1134	CHRNA1
GO:0048011	neurotrophin TRK receptor signaling pathway	biological_process	cellular process	1	172	23	17286	0.0434783	0.205585	0.333676	9001	HAP1
GO:0070423	nucleotide-binding oligomerization domain containing signaling pathway	biological_process	biological regulation	1	172	23	17286	0.0434783	0.205585	0.333676	387522	TMEM189-UBE2V1
GO:0090050	positive regulation of cell migration involved in sprouting angiogenesis	biological_process	biological regulation	1	172	23	17286	0.0434783	0.205585	0.333676	5743	PTGS2
GO:0007338	single fertilization	biological_process	multi-organism process	2	172	85	17286	0.0235294	0.207314	0.335613	32066674	HOXA10,SPAG1
GO:0043154	negative regulation of cysteine-type endopeptidase activity involved in apoptotic process	biological_process	biological regulation	2	172	85	17286	0.0235294	0.207314	0.335613	3305743	BIRC3,PTGS2
GO:0051726	regulation of cell cycle	biological_process	biological regulation	3	172	159	17286	0.0188679	0.210968	0.340351	89610265218	CCND3,CDKN1A,CDK14
GO:0007275	multicellular organism development	biological_process	multicellular organismal process	15	172	1197	17286	0.0125313	0.212145	0.340351	5.69133e+66	C1GALT1,ANGPT2,FAM3C,UNC5A,ANO1,ID1,VTA1,CCSAP,HOXA10,WNT3,PPARA,RAB23,EPHA7,NDRG2,BMP2
GO:0001659	temperature homeostasis	biological_process	biological regulation	1	172	24	17286	0.0416667	0.2135	0.340351	1907	EDN2
GO:0002009	morphogenesis of an epithelium	biological_process	developmental process	1	172	24	17286	0.0416667	0.2135	0.340351	3868	KRT16
GO:0006807	nitrogen compound metabolic process	biological_process	metabolic process	1	172	24	17286	0.0416667	0.2135	0.340351	51557	LGSN
GO:0010613	positive regulation of cardiac muscle hypertrophy	biological_process	biological regulation	1	172	24	17286	0.0416667	0.2135	0.340351	3572	IL6ST
GO:0014032	neural crest cell development	biological_process	cellular process	1	172	24	17286	0.0416667	0.2135	0.340351	9221	NOLC1
GO:0043537	negative regulation of blood vessel endothelial cell migration	biological_process	biological regulation	1	172	24	17286	0.0416667	0.2135	0.340351	285	ANGPT2
GO:0045088	regulation of innate immune response	biological_process	biological regulation	1	172	24	17286	0.0416667	0.2135	0.340351	330	BIRC3
GO:0050870	positive regulation of T cell activation	biological_process	biological adhesion	1	172	24	17286	0.0416667	0.2135	0.340351	84433	CARD11
GO:0051968	positive regulation of synaptic transmission, glutamatergic	biological_process	biological regulation	1	172	24	17286	0.0416667	0.2135	0.340351	5743	PTGS2
GO:2000311	regulation of AMPA receptor activity	biological_process	biological regulation	1	172	24	17286	0.0416667	0.2135	0.340351	27092	CACNG4
GO:0007049	cell cycle	biological_process	cellular process	9	172	663	17286	0.0135747	0.21582	0.343612	4.0859e+38	MAD2L1,CCND3,RASSF4,ZW10,ARL8B,CCSAP,CDKN1A,NEK4,CDK14
GO:0071260	cellular response to mechanical stimulus	biological_process	cellular process	2	172	88	17286	0.0227273	0.218253	0.347044	229275743	HABP4,PTGS2
GO:0015031	protein transport	biological_process	localization	9	172	666	17286	0.0135135	0.219502	0.347538	2.32999e+41	BICD2,ZW10,VAMP3,GDI1,ARL8B,VTA1,TIMM17A,RAB23,TOMM22
GO:0007263	nitric oxide mediated signal transduction	biological_process	biological regulation	1	172	25	17286	0.04	0.221337	0.347538	23576	DDAH1
GO:0017015	regulation of transforming growth factor beta receptor signaling pathway	biological_process	biological regulation	1	172	25	17286	0.04	0.221337	0.347538	4092	SMAD7
GO:0030517	negative regulation of axon extension	biological_process	biological regulation	1	172	25	17286	0.04	0.221337	0.347538	10988	METAP2
GO:0045721	negative regulation of gluconeogenesis	biological_process	biological regulation	1	172	25	17286	0.04	0.221337	0.347538	10447	FAM3C
GO:0045742	positive regulation of epidermal growth factor receptor signaling pathway	biological_process	biological regulation	1	172	25	17286	0.04	0.221337	0.347538	9001	HAP1
GO:0050999	regulation of nitric-oxide synthase activity	biological_process	metabolic process	1	172	25	17286	0.04	0.221337	0.347538	23576	DDAH1
GO:0055010	ventricular cardiac muscle tissue morphogenesis	biological_process	developmental process	1	172	25	17286	0.04	0.221337	0.347538	4092	SMAD7
GO:0070542	response to fatty acid	biological_process	response to stimulus	1	172	25	17286	0.04	0.221337	0.347538	5743	PTGS2
GO:0098586	cellular response to virus	biological_process	multi-organism process	1	172	25	17286	0.04	0.221337	0.347538	23076	RRP1B
GO:0007411	axon guidance	biological_process	cellular component organization or biogenesis	4	172	243	17286	0.0164609	0.223525	0.350534	9.02493e+16	UNC5A,GRB10,WNT3,EPHA7
GO:0007204	positive regulation of cytosolic calcium ion concentration	biological_process	biological regulation	3	172	165	17286	0.0181818	0.226559	0.352009	628962881907	SAA2,SAA1,EDN2
GO:0042493	response to drug	biological_process	response to stimulus	5	172	328	17286	0.0152439	0.228839	0.352009	7.04222e+22	TGFB2,SMTNL1,COL18A1,PTGS2,CDKN1A
GO:0007194	negative regulation of adenylate cyclase activity	biological_process	biological regulation	1	172	26	17286	0.0384615	0.229096	0.352009	4883	NPR3
GO:0009954	proximal/distal pattern formation	biological_process	developmental process	1	172	26	17286	0.0384615	0.229096	0.352009	3206	HOXA10
GO:0030099	myeloid cell differentiation	biological_process	cellular process	1	172	26	17286	0.0384615	0.229096	0.352009	7994	KAT6A
GO:0033365	protein localization to organelle	biological_process	localization	1	172	26	17286	0.0384615	0.229096	0.352009	23299	BICD2
GO:0043393	regulation of protein binding	biological_process	biological regulation	1	172	26	17286	0.0384615	0.229096	0.352009	53339	BTBD1
GO:0043403	skeletal muscle tissue regeneration	biological_process	developmental process	1	172	26	17286	0.0384615	0.229096	0.352009	6442	SGCA
GO:0045332	phospholipid translocation	biological_process	biological regulation	1	172	26	17286	0.0384615	0.229096	0.352009	161291	TMEM30B
GO:0048513	animal organ development	biological_process	developmental process	1	172	26	17286	0.0384615	0.229096	0.352009	7994	KAT6A
GO:0048738	cardiac muscle tissue development	biological_process	developmental process	1	172	26	17286	0.0384615	0.229096	0.352009	5433	POLR2D
GO:0048843	negative regulation of axon extension involved in axon guidance	biological_process	biological regulation	1	172	26	17286	0.0384615	0.229096	0.352009	7473	WNT3
GO:0048872	homeostasis of number of cells	biological_process	biological regulation	1	172	26	17286	0.0384615	0.229096	0.352009	84433	CARD11
GO:0051000	positive regulation of nitric-oxide synthase activity	biological_process	biological regulation	1	172	26	17286	0.0384615	0.229096	0.352009	4883	NPR3
GO:0055007	cardiac muscle cell differentiation	biological_process	cellular process	1	172	26	17286	0.0384615	0.229096	0.352009	650	BMP2
GO:0016197	endosomal transport	biological_process	localization	2	172	91	17286	0.021978	0.229241	0.352009	5520751534	ARL8B,VTA1
GO:0050727	regulation of inflammatory response	biological_process	biological regulation	2	172	91	17286	0.021978	0.229241	0.352009	3305743	BIRC3,PTGS2
GO:0006890	retrograde vesicle-mediated transport, Golgi to ER	biological_process	localization	2	172	93	17286	0.0215054	0.236588	0.357881	232999183	BICD2,ZW10
GO:0000188	inactivation of MAPK activity	biological_process	biological regulation	1	172	27	17286	0.037037	0.236778	0.357881	1846	DUSP4
GO:0003009	skeletal muscle contraction	biological_process	multicellular organismal process	1	172	27	17286	0.037037	0.236778	0.357881	1134	CHRNA1
GO:0007140	male meiotic nuclear division	biological_process	cellular component organization or biogenesis	1	172	27	17286	0.037037	0.236778	0.357881	400629	TEX19
GO:0007271	synaptic transmission, cholinergic	biological_process	cellular process	1	172	27	17286	0.037037	0.236778	0.357881	1134	CHRNA1
GO:0007276	gamete generation	biological_process	multi-organism process	1	172	27	17286	0.037037	0.236778	0.357881	7473	WNT3
GO:0019229	regulation of vasoconstriction	biological_process	multicellular organismal process	1	172	27	17286	0.037037	0.236778	0.357881	1907	EDN2
GO:0035902	response to immobilization stress	biological_process	response to stimulus	1	172	27	17286	0.037037	0.236778	0.357881	84918	LRP11
GO:0045453	bone resorption	biological_process	biological regulation	1	172	27	17286	0.037037	0.236778	0.357881	3574	IL7
GO:0048844	artery morphogenesis	biological_process	multicellular organismal process	1	172	27	17286	0.037037	0.236778	0.357881	4092	SMAD7
GO:0050434	positive regulation of viral transcription	biological_process	biological regulation	1	172	27	17286	0.037037	0.236778	0.357881	5433	POLR2D
GO:0055117	regulation of cardiac muscle contraction	biological_process	biological regulation	1	172	27	17286	0.037037	0.236778	0.357881	4092	SMAD7
GO:1900745	positive regulation of p38MAPK cascade	biological_process	biological regulation	1	172	27	17286	0.037037	0.236778	0.357881	650	BMP2
GO:0000462	maturation of SSU-rRNA from tricistronic rRNA transcript (SSU-rRNA, 5.8S rRNA, LSU-rRNA)	biological_process	cellular component organization or biogenesis	1	172	28	17286	0.0357143	0.244384	0.36454	57647	DHX37
GO:0032418	lysosome localization	biological_process	localization	1	172	28	17286	0.0357143	0.244384	0.36454	55207	ARL8B
GO:0034394	protein localization to cell surface	biological_process	localization	1	172	28	17286	0.0357143	0.244384	0.36454	23184	MESD
GO:0042157	lipoprotein metabolic process	biological_process	metabolic process	1	172	28	17286	0.0357143	0.244384	0.36454	5465	PPARA
GO:0042759	long-chain fatty acid biosynthetic process	biological_process	metabolic process	1	172	28	17286	0.0357143	0.244384	0.36454	5743	PTGS2
GO:0045104	intermediate filament cytoskeleton organization	biological_process	cellular process	1	172	28	17286	0.0357143	0.244384	0.36454	3868	KRT16
GO:0048041	focal adhesion assembly	biological_process	biological adhesion	1	172	28	17286	0.0357143	0.244384	0.36454	10979	FERMT2
GO:0050905	neuromuscular process	biological_process	multicellular organismal process	1	172	28	17286	0.0357143	0.244384	0.36454	1134	CHRNA1
GO:0060135	maternal process involved in female pregnancy	biological_process	multicellular organismal process	1	172	28	17286	0.0357143	0.244384	0.36454	285	ANGPT2
GO:0061436	establishment of skin barrier	biological_process	developmental process	1	172	28	17286	0.0357143	0.244384	0.36454	3868	KRT16
GO:0090200	positive regulation of release of cytochrome c from mitochondria	biological_process	biological regulation	1	172	28	17286	0.0357143	0.244384	0.36454	90427	BMF
GO:0006364	rRNA processing	biological_process	cellular component organization or biogenesis	3	172	172	17286	0.0174419	0.245015	0.365047	92215764723076	NOLC1,DHX37,RRP1B
GO:0006367	transcription initiation from RNA polymerase II promoter	biological_process	cellular process	3	172	174	17286	0.0172414	0.250334	0.372528	543310265465	POLR2D,CDKN1A,PPARA
GO:0006090	pyruvate metabolic process	biological_process	cellular process	1	172	29	17286	0.0344828	0.251915	0.372668	9123	SLC16A3
GO:0018146	keratan sulfate biosynthetic process	biological_process	cellular process	1	172	29	17286	0.0344828	0.251915	0.372668	11041	B4GAT1
GO:0031069	hair follicle morphogenesis	biological_process	multicellular organismal process	1	172	29	17286	0.0344828	0.251915	0.372668	7042	TGFB2
GO:0034113	heterotypic cell-cell adhesion	biological_process	biological adhesion	1	172	29	17286	0.0344828	0.251915	0.372668	64065	PERP
GO:0046697	decidualization	biological_process	multi-organism process	1	172	29	17286	0.0344828	0.251915	0.372668	5743	PTGS2
GO:0007160	cell-matrix adhesion	biological_process	biological adhesion	2	172	98	17286	0.0204082	0.255004	0.375906	109798754	FERMT2,ADAM9
GO:0016236	macroautophagy	biological_process	cellular process	2	172	98	17286	0.0204082	0.255004	0.375906	5153456993	VTA1,TOMM22
GO:0060326	cell chemotaxis	biological_process	cellular process	2	172	98	17286	0.0204082	0.255004	0.375906	62896288	SAA2,SAA1
GO:0006486	protein glycosylation	biological_process	cellular process	3	172	177	17286	0.0169492	0.258344	0.376584	569138536511041	C1GALT1,ALG2,B4GAT1
GO:0010033	response to organic substance	biological_process	response to stimulus	2	172	99	17286	0.020202	0.258692	0.376584	57431026	PTGS2,CDKN1A
GO:0003148	outflow tract septum morphogenesis	biological_process	multicellular organismal process	1	172	30	17286	0.0333333	0.259371	0.376584	7042	TGFB2
GO:0007281	germ cell development	biological_process	developmental process	1	172	30	17286	0.0333333	0.259371	0.376584	285	ANGPT2
GO:0015949	nucleobase-containing small molecule interconversion	biological_process	cellular process	1	172	30	17286	0.0333333	0.259371	0.376584	50808	AK3
GO:0021537	telencephalon development	biological_process	developmental process	1	172	30	17286	0.0333333	0.259371	0.376584	650	BMP2
GO:0032007	negative regulation of TOR signaling	biological_process	biological regulation	1	172	30	17286	0.0333333	0.259371	0.376584	64798	DEPTOR
GO:0033137	negative regulation of peptidyl-serine phosphorylation	biological_process	biological regulation	1	172	30	17286	0.0333333	0.259371	0.376584	4092	SMAD7
GO:0035987	endodermal cell differentiation	biological_process	cellular process	1	172	30	17286	0.0333333	0.259371	0.376584	1303	COL12A1
GO:0038111	interleukin-7-mediated signaling pathway	biological_process	biological regulation	1	172	30	17286	0.0333333	0.259371	0.376584	3574	IL7
GO:0042771	intrinsic apoptotic signaling pathway in response to DNA damage by p53 class mediator	biological_process	biological regulation	1	172	30	17286	0.0333333	0.259371	0.376584	1026	CDKN1A
GO:0045736	negative regulation of cyclin-dependent protein serine/threonine kinase activity	biological_process	biological regulation	1	172	30	17286	0.0333333	0.259371	0.376584	1026	CDKN1A
GO:0070372	regulation of ERK1 and ERK2 cascade	biological_process	biological regulation	1	172	30	17286	0.0333333	0.259371	0.376584	2045	EPHA7
GO:0006457	protein folding	biological_process	cellular process	3	172	178	17286	0.0168539	0.261022	0.378542	570882318423193	PLSCR4,MESD,GANAB
GO:0019886	antigen processing and presentation of exogenous peptide antigen via MHC class II	biological_process	immune system process	2	172	100	17286	0.02	0.262382	0.380074	15141520	CTSL,CTSS
GO:0000083	regulation of transcription involved in G1/S transition of mitotic cell cycle	biological_process	biological regulation	1	172	31	17286	0.0322581	0.266753	0.382428	5218	CDK14
GO:0001954	positive regulation of cell-matrix adhesion	biological_process	biological adhesion	1	172	31	17286	0.0322581	0.266753	0.382428	4814	NINJ1
GO:0007159	leukocyte cell-cell adhesion	biological_process	biological adhesion	1	172	31	17286	0.0322581	0.266753	0.382428	4907	NT5E
GO:0010803	regulation of tumor necrosis factor-mediated signaling pathway	biological_process	biological regulation	1	172	31	17286	0.0322581	0.266753	0.382428	330	BIRC3
GO:0019058	viral life cycle	biological_process	multi-organism process	1	172	31	17286	0.0322581	0.266753	0.382428	51534	VTA1
GO:0031116	positive regulation of microtubule polymerization	biological_process	cellular component organization or biogenesis	1	172	31	17286	0.0322581	0.266753	0.382428	51534	VTA1
GO:0035116	embryonic hindlimb morphogenesis	biological_process	developmental process	1	172	31	17286	0.0322581	0.266753	0.382428	7473	WNT3
GO:0036258	multivesicular body assembly	biological_process	cellular component organization or biogenesis	1	172	31	17286	0.0322581	0.266753	0.382428	51534	VTA1
GO:0097193	intrinsic apoptotic signaling pathway	biological_process	biological regulation	1	172	31	17286	0.0322581	0.266753	0.382428	1026	CDKN1A
GO:0007409	axonogenesis	biological_process	cellular component organization or biogenesis	2	172	102	17286	0.0196078	0.269761	0.385856	922110988	NOLC1,METAP2
GO:0032147	activation of protein kinase activity	biological_process	metabolic process	2	172	102	17286	0.0196078	0.269761	0.385856	70426787	TGFB2,NEK4
GO:0010629	negative regulation of gene expression	biological_process	biological regulation	4	172	265	17286	0.0150943	0.27099	0.386712	704233971026650	TGFB2,ID1,CDKN1A,BMP2
GO:0007346	regulation of mitotic cell cycle	biological_process	regulation of biological process	2	172	103	17286	0.0194175	0.27345	0.386712	10266787	CDKN1A,NEK4
GO:0010719	negative regulation of epithelial to mesenchymal transition	biological_process	biological regulation	1	172	32	17286	0.03125	0.274062	0.386712	4092	SMAD7
GO:0019228	neuronal action potential	biological_process	biological regulation	1	172	32	17286	0.03125	0.274062	0.386712	1134	CHRNA1
GO:0035633	maintenance of permeability of blood-brain barrier	biological_process	biological regulation	1	172	32	17286	0.03125	0.274062	0.386712	5743	PTGS2
GO:0043001	Golgi to plasma membrane protein transport	biological_process	localization	1	172	32	17286	0.03125	0.274062	0.386712	9341	VAMP3
GO:0045737	positive regulation of cyclin-dependent protein serine/threonine kinase activity	biological_process	biological regulation	1	172	32	17286	0.03125	0.274062	0.386712	896	CCND3
GO:0046627	negative regulation of insulin receptor signaling pathway	biological_process	biological regulation	1	172	32	17286	0.03125	0.274062	0.386712	2887	GRB10
GO:0050873	brown fat cell differentiation	biological_process	cellular process	1	172	32	17286	0.03125	0.274062	0.386712	5743	PTGS2
GO:0051924	regulation of calcium ion transport	biological_process	biological regulation	1	172	32	17286	0.03125	0.274062	0.386712	781	CACNA2D1
GO:0060325	face morphogenesis	biological_process	developmental process	1	172	32	17286	0.03125	0.274062	0.386712	83690	CRISPLD1
GO:0071480	cellular response to gamma radiation	biological_process	cellular process	1	172	32	17286	0.03125	0.274062	0.386712	1026	CDKN1A
GO:0042060	wound healing	biological_process	response to stimulus	2	172	104	17286	0.0192308	0.277138	0.390204	70425465	TGFB2,PPARA
GO:0071222	cellular response to lipopolysaccharide	biological_process	response to stimulus	3	172	184	17286	0.0163043	0.27716	0.390204	353376570888754	TICAM2,PLSCR4,ADAM9
GO:0006370	7-methylguanosine mRNA capping	biological_process	cellular process	1	172	33	17286	0.030303	0.281299	0.392503	5433	POLR2D
GO:0006904	vesicle docking involved in exocytosis	biological_process	cellular process	1	172	33	17286	0.030303	0.281299	0.392503	9341	VAMP3
GO:0007131	reciprocal meiotic recombination	biological_process	cellular component organization or biogenesis	1	172	33	17286	0.030303	0.281299	0.392503	400629	TEX19
GO:0045776	negative regulation of blood pressure	biological_process	biological regulation	1	172	33	17286	0.030303	0.281299	0.392503	5465	PPARA
GO:0060828	regulation of canonical Wnt signaling pathway	biological_process	biological regulation	1	172	33	17286	0.030303	0.281299	0.392503	5218	CDK14
GO:1900087	positive regulation of G1/S transition of mitotic cell cycle	biological_process	cellular process	1	172	33	17286	0.030303	0.281299	0.392503	896	CCND3
GO:2000352	negative regulation of endothelial cell apoptotic process	biological_process	biological regulation	1	172	33	17286	0.030303	0.281299	0.392503	7857	SCG2
GO:2000379	positive regulation of reactive oxygen species metabolic process	biological_process	biological regulation	1	172	33	17286	0.030303	0.281299	0.392503	1026	CDKN1A
GO:0006470	protein dephosphorylation	biological_process	cellular process	3	172	187	17286	0.0160428	0.285268	0.396757	578457871846	PTPN14,PTPRB,DUSP4
GO:0001819	positive regulation of cytokine production	biological_process	multicellular organismal process	1	172	34	17286	0.0294118	0.288464	0.396757	84433	CARD11
GO:0007588	excretion	biological_process	multicellular organismal process	1	172	34	17286	0.0294118	0.288464	0.396757	8645	KCNK5
GO:0016239	positive regulation of macroautophagy	biological_process	biological regulation	1	172	34	17286	0.0294118	0.288464	0.396757	5049	PAFAH1B2
GO:0017156	calcium ion regulated exocytosis	biological_process	cellular process	1	172	34	17286	0.0294118	0.288464	0.396757	9341	VAMP3
GO:0033993	response to lipid	biological_process	response to stimulus	1	172	34	17286	0.0294118	0.288464	0.396757	5465	PPARA
GO:0035115	embryonic forelimb morphogenesis	biological_process	developmental process	1	172	34	17286	0.0294118	0.288464	0.396757	7473	WNT3
GO:0038083	peptidyl-tyrosine autophosphorylation	biological_process	cellular process	1	172	34	17286	0.0294118	0.288464	0.396757	2444	FRK
GO:0043113	receptor clustering	biological_process	localization	1	172	34	17286	0.0294118	0.288464	0.396757	8831	SYNGAP1
GO:0045930	negative regulation of mitotic cell cycle	biological_process	cellular process	1	172	34	17286	0.0294118	0.288464	0.396757	4085	MAD2L1
GO:0046677	response to antibiotic	biological_process	response to stimulus	1	172	34	17286	0.0294118	0.288464	0.396757	3397	ID1
GO:0070507	regulation of microtubule cytoskeleton organization	biological_process	biological regulation	1	172	34	17286	0.0294118	0.288464	0.396757	23299	BICD2
GO:0090314	positive regulation of protein targeting to membrane	biological_process	biological regulation	1	172	34	17286	0.0294118	0.288464	0.396757	285966	TCAF2
GO:0006915	apoptotic process	biological_process	cellular process	9	172	720	17286	0.0125	0.28954	0.3978	3.30641e+40	BIRC3,PERP,UNC5A,RRP1B,TIAF1,SULF1,RMDN3,EPHA7,BMF
GO:0007166	cell surface receptor signaling pathway	biological_process	response to stimulus	4	172	274	17286	0.0145985	0.290914	0.39925	281233096161907	GP1BB,BIRC3,RNF7,EDN2
GO:0000902	cell morphogenesis	biological_process	cellular component organization or biogenesis	2	172	108	17286	0.0185185	0.291878	0.399698	70427473	TGFB2,WNT3
GO:1990830	cellular response to leukemia inhibitory factor	biological_process	response to stimulus	2	172	108	17286	0.0185185	0.291878	0.399698	40929945	SMAD7,GFPT2
GO:0001578	microtubule bundle formation	biological_process	cellular component organization or biogenesis	1	172	35	17286	0.0285714	0.295558	0.402101	10988	METAP2
GO:0006259	DNA metabolic process	biological_process	metabolic process	1	172	35	17286	0.0285714	0.295558	0.402101	4907	NT5E
GO:0032689	negative regulation of interferon-gamma production	biological_process	biological regulation	1	172	35	17286	0.0285714	0.295558	0.402101	64115	VSIR
GO:0042327	positive regulation of phosphorylation	biological_process	biological regulation	1	172	35	17286	0.0285714	0.295558	0.402101	2887	GRB10
GO:0048863	stem cell differentiation	biological_process	developmental process	1	172	35	17286	0.0285714	0.295558	0.402101	11166	SOX21
GO:0051028	mRNA transport	biological_process	localization	2	172	109	17286	0.0183486	0.295558	0.402101	232999908	BICD2,G3BP2
GO:0001503	ossification	biological_process	multicellular organismal process	2	172	110	17286	0.0181818	0.299236	0.406662	23184650	MESD,BMP2
GO:0007274	neuromuscular synaptic transmission	biological_process	cellular process	1	172	36	17286	0.0277778	0.302582	0.407672	1134	CHRNA1
GO:0007498	mesoderm development	biological_process	developmental process	1	172	36	17286	0.0277778	0.302582	0.407672	23184	MESD
GO:0010043	response to zinc ion	biological_process	response to stimulus	1	172	36	17286	0.0277778	0.302582	0.407672	3861	KRT14
GO:0010634	positive regulation of epithelial cell migration	biological_process	cellular process	1	172	36	17286	0.0277778	0.302582	0.407672	7042	TGFB2
GO:0017157	regulation of exocytosis	biological_process	biological regulation	1	172	36	17286	0.0277778	0.302582	0.407672	9001	HAP1
GO:0045765	regulation of angiogenesis	biological_process	biological regulation	1	172	36	17286	0.0277778	0.302582	0.407672	3397	ID1
GO:0048873	homeostasis of number of cells within a tissue	biological_process	biological regulation	1	172	36	17286	0.0277778	0.302582	0.407672	3574	IL7
GO:0070371	ERK1 and ERK2 cascade	biological_process	biological regulation	1	172	36	17286	0.0277778	0.302582	0.407672	2887	GRB10
GO:0007568	aging	biological_process	developmental process	3	172	195	17286	0.0153846	0.306975	0.413044	386838615743	KRT16,KRT14,PTGS2
GO:0006730	one-carbon metabolic process	biological_process	cellular process	1	172	37	17286	0.027027	0.309536	0.413044	771	CA12
GO:0006906	vesicle fusion	biological_process	cellular component organization or biogenesis	1	172	37	17286	0.027027	0.309536	0.413044	9341	VAMP3
GO:0030513	positive regulation of BMP signaling pathway	biological_process	biological regulation	1	172	37	17286	0.027027	0.309536	0.413044	23213	SULF1
GO:0048286	lung alveolus development	biological_process	developmental process	1	172	37	17286	0.027027	0.309536	0.413044	1907	EDN2
GO:0071479	cellular response to ionizing radiation	biological_process	cellular process	1	172	37	17286	0.027027	0.309536	0.413044	1026	CDKN1A
GO:0071773	cellular response to BMP stimulus	biological_process	cellular process	1	172	37	17286	0.027027	0.309536	0.413044	650	BMP2
GO:0097009	energy homeostasis	biological_process	multicellular organismal process	1	172	37	17286	0.027027	0.309536	0.413044	1907	EDN2
GO:2001244	positive regulation of intrinsic apoptotic signaling pathway	biological_process	biological regulation	1	172	37	17286	0.027027	0.309536	0.413044	90427	BMF
GO:0006898	receptor-mediated endocytosis	biological_process	localization	2	172	113	17286	0.0176991	0.310248	0.413554	62896288	SAA2,SAA1
GO:0006468	protein phosphorylation	biological_process	cellular process	8	172	646	17286	0.0123839	0.314653	0.418223	2.4447e+31	FRK,TGFB2,CCND3,SBK1,NEK4,CDK14,EPHA7,BMP2
GO:0009409	response to cold	biological_process	response to stimulus	1	172	38	17286	0.0263158	0.316421	0.418223	84918	LRP11
GO:0030049	muscle filament sliding	biological_process	cellular process	1	172	38	17286	0.0263158	0.316421	0.418223	7171	TPM4
GO:0042100	B cell proliferation	biological_process	cellular process	1	172	38	17286	0.0263158	0.316421	0.418223	84433	CARD11
GO:0050769	positive regulation of neurogenesis	biological_process	biological regulation	1	172	38	17286	0.0263158	0.316421	0.418223	9001	HAP1
GO:0051252	regulation of RNA metabolic process	biological_process	biological regulation	1	172	38	17286	0.0263158	0.316421	0.418223	8831	SYNGAP1
GO:0071310	cellular response to organic substance	biological_process	cellular process	1	172	38	17286	0.0263158	0.316421	0.418223	10988	METAP2
GO:2001240	negative regulation of extrinsic apoptotic signaling pathway in absence of ligand	biological_process	biological regulation	1	172	38	17286	0.0263158	0.316421	0.418223	3574	IL7
GO:0001934	positive regulation of protein phosphorylation	biological_process	biological regulation	3	172	200	17286	0.015	0.32058	0.42288	8962045650	CCND3,EPHA7,BMP2
GO:0008284	positive regulation of cell proliferation	biological_process	biological regulation	7	172	558	17286	0.0125448	0.32062	0.42288	7.04292e+28	TGFB2,NOLC1,COL18A1,PTGS2,IL6ST,IL7,EDN2
GO:0001707	mesoderm formation	biological_process	developmental process	1	172	39	17286	0.025641	0.323237	0.423215	7473	WNT3
GO:0006284	base-excision repair	biological_process	cellular process	1	172	39	17286	0.025641	0.323237	0.423215	55170	PRMT6
GO:0007017	microtubule-based process	biological_process	cellular process	1	172	39	17286	0.025641	0.323237	0.423215	81027	TUBB1
GO:0031214	biomineral tissue development	biological_process	developmental process	1	172	39	17286	0.025641	0.323237	0.423215	6574	SLC20A1
GO:0043542	endothelial cell migration	biological_process	cellular process	1	172	39	17286	0.025641	0.323237	0.423215	7857	SCG2
GO:0050919	negative chemotaxis	biological_process	locomotion	1	172	39	17286	0.025641	0.323237	0.423215	2045	EPHA7
GO:1990090	cellular response to nerve growth factor stimulus	biological_process	cellular process	1	172	39	17286	0.025641	0.323237	0.423215	3397	ID1
GO:0001649	osteoblast differentiation	biological_process	cellular process	2	172	118	17286	0.0169492	0.328521	0.427142	7171650	TPM4,BMP2
GO:0006936	muscle contraction	biological_process	multicellular organismal process	2	172	118	17286	0.0169492	0.328521	0.427142	71716442	TPM4,SGCA
GO:0051260	protein homooligomerization	biological_process	cellular component organization or biogenesis	2	172	118	17286	0.0169492	0.328521	0.427142	9908115207	G3BP2,KCTD12
GO:0005977	glycogen metabolic process	biological_process	cellular process	1	172	40	17286	0.025	0.329987	0.427142	3572	IL6ST
GO:0006641	triglyceride metabolic process	biological_process	cellular process	1	172	40	17286	0.025	0.329987	0.427142	6583	SLC22A4
GO:0007528	neuromuscular junction development	biological_process	cellular component organization or biogenesis	1	172	40	17286	0.025	0.329987	0.427142	1134	CHRNA1
GO:0030010	establishment of cell polarity	biological_process	cellular process	1	172	40	17286	0.025	0.329987	0.427142	10988	METAP2
GO:0035774	positive regulation of insulin secretion involved in cellular response to glucose stimulus	biological_process	biological regulation	1	172	40	17286	0.025	0.329987	0.427142	55107	ANO1
GO:0042476	odontogenesis	biological_process	multicellular organismal process	1	172	40	17286	0.025	0.329987	0.427142	7042	TGFB2
GO:0045773	positive regulation of axon extension	biological_process	cellular component organization or biogenesis	1	172	40	17286	0.025	0.329987	0.427142	2664	GDI1
GO:0086091	regulation of heart rate by cardiac conduction	biological_process	biological regulation	1	172	40	17286	0.025	0.329987	0.427142	781	CACNA2D1
GO:0009952	anterior/posterior pattern specification	biological_process	developmental process	2	172	119	17286	0.0168067	0.332161	0.429513	32067473	HOXA10,WNT3
GO:0007080	mitotic metaphase plate congression	biological_process	cellular component organization or biogenesis	1	172	41	17286	0.0243902	0.336669	0.433927	9183	ZW10
GO:0008219	cell death	biological_process	cellular process	1	172	41	17286	0.0243902	0.336669	0.433927	7042	TGFB2
GO:0042177	negative regulation of protein catabolic process	biological_process	metabolic process	1	172	41	17286	0.0243902	0.336669	0.433927	4085	MAD2L1
GO:0006811	ion transport	biological_process	localization	8	172	661	17286	0.0121029	0.33696	0.433927	6.58366e+32	SLC22A4,SLCO2A1,CACNG4,ANO1,KCNK5,CHRNA1,SLC20A1,CACNA2D1
GO:0007030	Golgi organization	biological_process	cellular component organization or biogenesis	2	172	121	17286	0.0165289	0.339424	0.435757	3533769183	TICAM2,ZW10
GO:0009617	response to bacterium	biological_process	multi-organism process	2	172	121	17286	0.0165289	0.339424	0.435757	65010561	BMP2,IFI44
GO:0051321	meiotic cell cycle	biological_process	cellular process	2	172	121	17286	0.0165289	0.339424	0.435757	9183400629	ZW10,TEX19
GO:0032355	response to estradiol	biological_process	response to stimulus	2	172	122	17286	0.0163934	0.343047	0.438914	574310095	PTGS2,ARPC1B
GO:0045471	response to ethanol	biological_process	response to stimulus	2	172	122	17286	0.0163934	0.343047	0.438914	102875433	RGS19,POLR2D
GO:0030501	positive regulation of bone mineralization	biological_process	biological regulation	1	172	42	17286	0.0238095	0.343285	0.438914	650	BMP2
GO:0045787	positive regulation of cell cycle	biological_process	biological regulation	1	172	42	17286	0.0238095	0.343285	0.438914	7042	TGFB2
GO:0007229	integrin-mediated signaling pathway	biological_process	biological regulation	2	172	123	17286	0.0162602	0.346663	0.442782	109798754	FERMT2,ADAM9
GO:0010628	positive regulation of gene expression	biological_process	biological regulation	6	172	482	17286	0.0124481	0.347571	0.44349	3.39775e+23	ID1,WNT3,VSIR,IL7,BMP2,IL32
GO:0006955	immune response	biological_process	immune system process	5	172	391	17286	0.0127877	0.349404	0.445019	4.05015e+20	LTB,CTSS,IL7,IFI44,IL32
GO:1904646	cellular response to amyloid-beta	biological_process	cellular process	1	172	43	17286	0.0232558	0.349835	0.445019	781	CACNA2D1
GO:1990573	potassium ion import across plasma membrane	biological_process	cellular process	1	172	43	17286	0.0232558	0.349835	0.445019	8645	KCNK5
GO:0006887	exocytosis	biological_process	cellular process	2	172	125	17286	0.016	0.353876	0.448713	93419001	VAMP3,HAP1
GO:0033209	tumor necrosis factor-mediated signaling pathway	biological_process	cellular process	2	172	125	17286	0.016	0.353876	0.448713	4050330	LTB,BIRC3
GO:0002181	cytoplasmic translation	biological_process	cellular process	1	172	44	17286	0.0227273	0.356321	0.448713	51534	VTA1
GO:0015701	bicarbonate transport	biological_process	localization	1	172	44	17286	0.0227273	0.356321	0.448713	771	CA12
GO:0030522	intracellular receptor signaling pathway	biological_process	biological regulation	1	172	44	17286	0.0227273	0.356321	0.448713	5465	PPARA
GO:0032570	response to progesterone	biological_process	response to stimulus	1	172	44	17286	0.0227273	0.356321	0.448713	7042	TGFB2
GO:0042220	response to cocaine	biological_process	response to stimulus	1	172	44	17286	0.0227273	0.356321	0.448713	27092	CACNG4
GO:0042307	positive regulation of protein import into nucleus	biological_process	biological regulation	1	172	44	17286	0.0227273	0.356321	0.448713	5743	PTGS2
GO:0050767	regulation of neurogenesis	biological_process	biological regulation	1	172	44	17286	0.0227273	0.356321	0.448713	7473	WNT3
GO:2000134	negative regulation of G1/S transition of mitotic cell cycle	biological_process	biological regulation	1	172	44	17286	0.0227273	0.356321	0.448713	1026	CDKN1A
GO:0006814	sodium ion transport	biological_process	localization	2	172	127	17286	0.015748	0.361062	0.453772	65836574	SLC22A4,SLC20A1
GO:0007264	small GTPase mediated signal transduction	biological_process	cellular process	2	172	127	17286	0.015748	0.361062	0.453772	102872664	RGS19,GDI1
GO:0001658	branching involved in ureteric bud morphogenesis	biological_process	developmental process	1	172	45	17286	0.0222222	0.362742	0.454061	650	BMP2
GO:0006352	DNA-templated transcription, initiation	biological_process	cellular process	1	172	45	17286	0.0222222	0.362742	0.454061	5433	POLR2D
GO:0006749	glutathione metabolic process	biological_process	cellular process	1	172	45	17286	0.0222222	0.362742	0.454061	9536	PTGES
GO:0070534	protein K63-linked ubiquitination	biological_process	cellular process	1	172	45	17286	0.0222222	0.362742	0.454061	387522	TMEM189-UBE2V1
GO:0007165	signal transduction	biological_process	cellular process	23	172	2127	17286	0.0108134	0.367908	0.458811	8.44339e+101	CARD11,CCND3,RASSF4,SH3GL3,LTB,ANGPT2,FAM3C,MICOS10-NBL1,UNC5A,GDI1,CHRNA1,PTGES,CMTM7,GRB10,NTS,SYNGAP1,RAB23,IL6ST,PLAU,IL7,NDRG2,RNF7,BMP2
GO:0001657	ureteric bud development	biological_process	multicellular organismal process	1	172	46	17286	0.0217391	0.369099	0.458811	4092	SMAD7
GO:0002088	lens development in camera-type eye	biological_process	developmental process	1	172	46	17286	0.0217391	0.369099	0.458811	1417	CRYBB3
GO:0008652	cellular amino acid biosynthetic process	biological_process	cellular process	1	172	46	17286	0.0217391	0.369099	0.458811	2346	FOLH1
GO:0035094	response to nicotine	biological_process	response to stimulus	1	172	46	17286	0.0217391	0.369099	0.458811	1134	CHRNA1
GO:0051480	regulation of cytosolic calcium ion concentration	biological_process	biological regulation	1	172	46	17286	0.0217391	0.369099	0.458811	169200	TMEM64
GO:0060173	limb development	biological_process	developmental process	1	172	46	17286	0.0217391	0.369099	0.458811	7473	WNT3
GO:0007169	transmembrane receptor protein tyrosine kinase signaling pathway	biological_process	biological regulation	2	172	130	17286	0.0153846	0.371785	0.461691	24442045	FRK,EPHA7
GO:0001890	placenta development	biological_process	developmental process	1	172	47	17286	0.0212766	0.375394	0.46525	400629	TEX19
GO:0007566	embryo implantation	biological_process	multi-organism process	1	172	47	17286	0.0212766	0.375394	0.46525	5743	PTGS2
GO:0030308	negative regulation of cell growth	biological_process	biological regulation	2	172	132	17286	0.0151515	0.378894	0.469124	70421026	TGFB2,CDKN1A
GO:0008277	regulation of G protein-coupled receptor signaling pathway	biological_process	biological regulation	1	172	48	17286	0.0208333	0.381626	0.470184	115207	KCTD12
GO:0009408	response to heat	biological_process	response to stimulus	1	172	48	17286	0.0208333	0.381626	0.470184	84918	LRP11
GO:0034260	negative regulation of GTPase activity	biological_process	biological regulation	1	172	48	17286	0.0208333	0.381626	0.470184	23076	RRP1B
GO:0071364	cellular response to epidermal growth factor stimulus	biological_process	cellular process	1	172	48	17286	0.0208333	0.381626	0.470184	3397	ID1
GO:0097191	extrinsic apoptotic signaling pathway	biological_process	biological regulation	1	172	48	17286	0.0208333	0.381626	0.470184	7042	TGFB2
GO:0070588	calcium ion transmembrane transport	biological_process	localization	2	172	134	17286	0.0149254	0.385969	0.475068	27092781	CACNG4,CACNA2D1
GO:0006511	ubiquitin-dependent protein catabolic process	biological_process	cellular process	4	172	317	17286	0.0126183	0.387743	0.476783	4.08557e+18	MAD2L1,RNF150,UBR3,RNF7
GO:0016070	RNA metabolic process	biological_process	cellular process	1	172	50	17286	0.02	0.393904	0.482466	5433	POLR2D
GO:0032024	positive regulation of insulin secretion	biological_process	biological regulation	1	172	50	17286	0.02	0.393904	0.482466	5433	POLR2D
GO:0042572	retinol metabolic process	biological_process	biological regulation	1	172	50	17286	0.02	0.393904	0.482466	5433	POLR2D
GO:0043647	inositol phosphate metabolic process	biological_process	cellular process	1	172	50	17286	0.02	0.393904	0.482466	55190	NUDT11
GO:0006869	lipid transport	biological_process	localization	2	172	137	17286	0.0145985	0.396516	0.485191	6578161291	SLCO2A1,TMEM30B
GO:0000186	activation of MAPKK activity	biological_process	biological regulation	1	172	51	17286	0.0196078	0.399953	0.487491	8754	ADAM9
GO:0045597	positive regulation of cell differentiation	biological_process	biological regulation	1	172	51	17286	0.0196078	0.399953	0.487491	650	BMP2
GO:0051781	positive regulation of cell division	biological_process	cellular process	1	172	51	17286	0.0196078	0.399953	0.487491	7042	TGFB2
GO:0061025	membrane fusion	biological_process	cellular component organization or biogenesis	1	172	51	17286	0.0196078	0.399953	0.487491	9341	VAMP3
GO:0007601	visual perception	biological_process	multicellular organismal process	3	172	230	17286	0.0130435	0.401803	0.48927	1417807815433	CRYBB3,COL18A1,POLR2D
GO:0007162	negative regulation of cell adhesion	biological_process	biological adhesion	1	172	52	17286	0.0192308	0.405941	0.492395	8831	SYNGAP1
GO:0009411	response to UV	biological_process	response to stimulus	1	172	52	17286	0.0192308	0.405941	0.492395	1026	CDKN1A
GO:0032720	negative regulation of tumor necrosis factor production	biological_process	biological regulation	1	172	52	17286	0.0192308	0.405941	0.492395	64115	VSIR
GO:0046854	phosphatidylinositol phosphorylation	biological_process	cellular process	1	172	52	17286	0.0192308	0.405941	0.492395	30837	SOCS7
GO:0006351	transcription, DNA-templated	biological_process	cellular process	2	172	140	17286	0.0142857	0.406981	0.493179	543351534	POLR2D,VTA1
GO:0016310	phosphorylation	biological_process	cellular process	8	172	708	17286	0.0112994	0.408079	0.494032	2.44451e+34	FRK,AK3,SBK1,CDKN1A,PLAU,NEK4,CDK14,EPHA7
GO:0000086	G2/M transition of mitotic cell cycle	biological_process	cellular process	2	172	141	17286	0.0141844	0.41045	0.495747	10265218	CDKN1A,CDK14
GO:0006094	gluconeogenesis	biological_process	metabolic process	1	172	53	17286	0.0188679	0.41187	0.495747	5433	POLR2D
GO:0006487	protein N-linked glycosylation	biological_process	metabolic process	1	172	53	17286	0.0188679	0.41187	0.495747	9945	GFPT2
GO:0006605	protein targeting	biological_process	localization	1	172	53	17286	0.0188679	0.41187	0.495747	9001	HAP1
GO:0042110	T cell activation	biological_process	immune system process	1	172	53	17286	0.0188679	0.41187	0.495747	84433	CARD11
GO:0042594	response to starvation	biological_process	response to stimulus	1	172	53	17286	0.0188679	0.41187	0.495747	84918	LRP11
GO:0050900	leukocyte migration	biological_process	immune system process	2	172	142	17286	0.0140845	0.413909	0.497246	2859123	ANGPT2,SLC16A3
GO:0065003	protein-containing complex assembly	biological_process	cellular component organization or biogenesis	2	172	142	17286	0.0140845	0.413909	0.497246	91839341	ZW10,VAMP3
GO:0009755	hormone-mediated signaling pathway	biological_process	biological regulation	1	172	54	17286	0.0185185	0.41774	0.499931	5465	PPARA
GO:0010212	response to ionizing radiation	biological_process	response to stimulus	1	172	54	17286	0.0185185	0.41774	0.499931	3861	KRT14
GO:0021762	substantia nigra development	biological_process	developmental process	1	172	54	17286	0.0185185	0.41774	0.499931	57447	NDRG2
GO:0023014	signal transduction by protein phosphorylation	biological_process	regulation of biological process	1	172	54	17286	0.0185185	0.41774	0.499931	6787	NEK4
GO:0043312	neutrophil degranulation	biological_process	cellular process	6	172	524	17286	0.0114504	0.422249	0.502091	2.4445e+25	FRK,PAFAH1B2,TICAM2,PTPRB,CTSS,PLAU
GO:0003007	heart morphogenesis	biological_process	developmental process	1	172	55	17286	0.0181818	0.423552	0.502091	7042	TGFB2
GO:0010507	negative regulation of autophagy	biological_process	biological regulation	1	172	55	17286	0.0181818	0.423552	0.502091	90427	BMF
GO:0010923	negative regulation of phosphatase activity	biological_process	biological regulation	1	172	55	17286	0.0181818	0.423552	0.502091	23076	RRP1B
GO:0016573	histone acetylation	biological_process	cellular component organization or biogenesis	1	172	55	17286	0.0181818	0.423552	0.502091	7994	KAT6A
GO:0031098	stress-activated protein kinase signaling cascade	biological_process	biological regulation	1	172	55	17286	0.0181818	0.423552	0.502091	6787	NEK4
GO:0032515	negative regulation of phosphoprotein phosphatase activity	biological_process	biological regulation	1	172	55	17286	0.0181818	0.423552	0.502091	9616	RNF7
GO:0048146	positive regulation of fibroblast proliferation	biological_process	biological regulation	1	172	55	17286	0.0181818	0.423552	0.502091	1026	CDKN1A
GO:0050877	nervous system process	biological_process	multicellular organismal process	1	172	55	17286	0.0181818	0.423552	0.502091	1134	CHRNA1
GO:0051225	spindle assembly	biological_process	cellular component organization or biogenesis	1	172	55	17286	0.0181818	0.423552	0.502091	81027	TUBB1
GO:0031175	neuron projection development	biological_process	cellular component organization or biogenesis	2	172	145	17286	0.0137931	0.424225	0.502128	9024910988	UNC5A,METAP2
GO:0006954	inflammatory response	biological_process	response to stimulus	5	172	429	17286	0.011655	0.424384	0.502128	3.86835e+20	KRT16,TICAM2,PTGS2,SCG2,BMP2
GO:0000122	negative regulation of transcription by RNA polymerase II	biological_process	biological regulation	10	172	914	17286	0.0109409	0.425382	0.502834	4.09224e+41	SMAD7,FRK,JAZF1,CCND3,YEATS2,ELK4,ID1,PPARA,BMP2,PRMT6
GO:0044267	cellular protein metabolic process	biological_process	cellular process	3	172	240	17286	0.0125	0.42837	0.505889	785762896288	SCG2,SAA2,SAA1
GO:0007254	JNK cascade	biological_process	cellular process	1	172	56	17286	0.0178571	0.429306	0.50604	387522	TMEM189-UBE2V1
GO:0031397	negative regulation of protein ubiquitination	biological_process	metabolic process	1	172	56	17286	0.0178571	0.429306	0.50604	4092	SMAD7
GO:0000281	mitotic cytokinesis	biological_process	cellular process	1	172	57	17286	0.0175439	0.435003	0.511312	8831	SYNGAP1
GO:0031334	positive regulation of protein complex assembly	biological_process	biological regulation	1	172	57	17286	0.0175439	0.435003	0.511312	90427	BMF
GO:0060078	regulation of postsynaptic membrane potential	biological_process	biological regulation	1	172	57	17286	0.0175439	0.435003	0.511312	1134	CHRNA1
GO:0006968	cellular defense response	biological_process	response to stimulus	1	172	58	17286	0.0172414	0.440643	0.516186	51715	RAB23
GO:0021549	cerebellum development	biological_process	developmental process	1	172	58	17286	0.0172414	0.440643	0.516186	9001	HAP1
GO:0031295	T cell costimulation	biological_process	biological adhesion	1	172	58	17286	0.0172414	0.440643	0.516186	84433	CARD11
GO:0000226	microtubule cytoskeleton organization	biological_process	cellular component organization or biogenesis	2	172	150	17286	0.0133333	0.441209	0.516186	8102710988	TUBB1,METAP2
GO:0045766	positive regulation of angiogenesis	biological_process	developmental process	2	172	150	17286	0.0133333	0.441209	0.516186	28523576	ANGPT2,DDAH1
GO:0006816	calcium ion transport	biological_process	localization	2	172	151	17286	0.013245	0.444573	0.519632	27092781	CACNG4,CACNA2D1
GO:0006977	DNA damage response, signal transduction by p53 class mediator resulting in cell cycle arrest	biological_process	biological regulation	1	172	59	17286	0.0169492	0.446228	0.519632	1026	CDKN1A
GO:0042542	response to hydrogen peroxide	biological_process	response to stimulus	1	172	59	17286	0.0169492	0.446228	0.519632	8754	ADAM9
GO:0043401	steroid hormone mediated signaling pathway	biological_process	biological regulation	1	172	59	17286	0.0169492	0.446228	0.519632	5465	PPARA
GO:0048015	phosphatidylinositol-mediated signaling	biological_process	biological regulation	1	172	59	17286	0.0169492	0.446228	0.519632	4883	NPR3
GO:0000045	autophagosome assembly	biological_process	cellular component organization or biogenesis	1	172	60	17286	0.0166667	0.451757	0.524122	51715	RAB23
GO:0007389	pattern specification process	biological_process	developmental process	1	172	60	17286	0.0166667	0.451757	0.524122	8831	SYNGAP1
GO:0042475	odontogenesis of dentin-containing tooth	biological_process	developmental process	1	172	60	17286	0.0166667	0.451757	0.524122	650	BMP2
GO:0071345	cellular response to cytokine stimulus	biological_process	cellular process	1	172	60	17286	0.0166667	0.451757	0.524122	5784	PTPN14
GO:0006508	proteolysis	biological_process	metabolic process	7	172	639	17286	0.0109546	0.45236	0.524336	1.51488e+29	CTSL,ADAM9,PRSS22,CTSS,FOLH1,PLAU,METAP2
GO:0048511	rhythmic process	biological_process	rhythmic process	2	172	154	17286	0.012987	0.454598	0.526443	33975465	ID1,PPARA
GO:0006959	humoral immune response	biological_process	immune system process	1	172	61	17286	0.0163934	0.457231	0.528515	3574	IL7
GO:0048661	positive regulation of smooth muscle cell proliferation	biological_process	biological regulation	1	172	61	17286	0.0163934	0.457231	0.528515	5743	PTGS2
GO:0006417	regulation of translation	biological_process	biological regulation	2	172	155	17286	0.0129032	0.457917	0.52882	922122927	NOLC1,HABP4
GO:0019233	sensory perception of pain	biological_process	multicellular organismal process	1	172	62	17286	0.016129	0.462651	0.532814	5743	PTGS2
GO:0048666	neuron development	biological_process	developmental process	1	172	62	17286	0.016129	0.462651	0.532814	7042	TGFB2
GO:0070830	bicellular tight junction assembly	biological_process	cellular component organization or biogenesis	1	172	62	17286	0.016129	0.462651	0.532814	137075	CLDN23
GO:0009306	protein secretion	biological_process	cellular process	1	172	63	17286	0.015873	0.468017	0.538499	7857	SCG2
GO:0038061	NIK/NF-kappaB signaling	biological_process	biological regulation	1	172	64	17286	0.015625	0.47333	0.543613	330	BIRC3
GO:0045860	positive regulation of protein kinase activity	biological_process	biological regulation	1	172	64	17286	0.015625	0.47333	0.543613	1026	CDKN1A
GO:0043086	negative regulation of catalytic activity	biological_process	biological regulation	1	172	65	17286	0.0153846	0.47859	0.548648	3574	IL7
GO:0060348	bone development	biological_process	developmental process	1	172	65	17286	0.0153846	0.47859	0.548648	23213	SULF1
GO:0043627	response to estrogen	biological_process	response to stimulus	1	172	66	17286	0.0151515	0.483797	0.553605	10095	ARPC1B
GO:0060079	excitatory postsynaptic potential	biological_process	biological regulation	1	172	66	17286	0.0151515	0.483797	0.553605	1134	CHRNA1
GO:0043687	post-translational protein modification	biological_process	cellular process	4	172	361	17286	0.0110803	0.485034	0.554515	8.40788e+17	KBTBD7,SCG2,RNF7,BTBD1
GO:0050776	regulation of immune response	biological_process	biological regulation	2	172	164	17286	0.0121951	0.487252	0.556457	8443364115	CARD11,VSIR
GO:0007193	adenylate cyclase-inhibiting G protein-coupled receptor signaling pathway	biological_process	biological regulation	1	172	67	17286	0.0149254	0.488953	0.556457	4883	NPR3
GO:0035019	somatic stem cell population maintenance	biological_process	developmental process	1	172	67	17286	0.0149254	0.488953	0.556457	5433	POLR2D
GO:0050680	negative regulation of epithelial cell proliferation	biological_process	biological regulation	1	172	67	17286	0.0149254	0.488953	0.556457	7042	TGFB2
GO:1901215	negative regulation of neuron death	biological_process	biological regulation	1	172	67	17286	0.0149254	0.488953	0.556457	5465	PPARA
GO:0007267	cell-cell signaling	biological_process	cellular process	3	172	264	17286	0.0113636	0.490266	0.557444	40503574650	LTB,IL7,BMP2
GO:0042752	regulation of circadian rhythm	biological_process	biological regulation	1	172	68	17286	0.0147059	0.494058	0.561247	5465	PPARA
GO:0008360	regulation of cell shape	biological_process	biological regulation	2	172	167	17286	0.011976	0.496811	0.563352	109798831	FERMT2,SYNGAP1
GO:0018105	peptidyl-serine phosphorylation	biological_process	cellular process	2	172	167	17286	0.011976	0.496811	0.563352	219537388228	SMTNL1,SBK1
GO:0006886	intracellular protein transport	biological_process	localization	4	172	367	17286	0.0108992	0.497873	0.56392	3.53376e+20	TICAM2,TIMM17A,RAB23,TOMM22
GO:0018107	peptidyl-threonine phosphorylation	biological_process	cellular process	1	172	69	17286	0.0144928	0.499112	0.56392	388228	SBK1
GO:0048010	vascular endothelial growth factor receptor signaling pathway	biological_process	biological regulation	1	172	69	17286	0.0144928	0.499112	0.56392	23213	SULF1
GO:0050679	positive regulation of epithelial cell proliferation	biological_process	biological regulation	1	172	69	17286	0.0144928	0.499112	0.56392	3397	ID1
GO:0051092	positive regulation of NF-kappaB transcription factor activity	biological_process	biological regulation	2	172	169	17286	0.0118343	0.503121	0.567527	84433387522	CARD11,TMEM189-UBE2V1
GO:0009967	positive regulation of signal transduction	biological_process	biological regulation	1	172	70	17286	0.0142857	0.504116	0.567527	9908	G3BP2
GO:0045652	regulation of megakaryocyte differentiation	biological_process	immune system process	1	172	70	17286	0.0142857	0.504116	0.567527	55170	PRMT6
GO:0090502	RNA phosphodiester bond hydrolysis, endonucleolytic	biological_process	cellular process	1	172	70	17286	0.0142857	0.504116	0.567527	283989	TSEN54
GO:0001523	retinoid metabolic process	biological_process	cellular process	1	172	71	17286	0.0140845	0.50907	0.572077	5433	POLR2D
GO:0001570	vasculogenesis	biological_process	cellular process	1	172	71	17286	0.0140845	0.50907	0.572077	8831	SYNGAP1
GO:0006355	regulation of transcription, DNA-templated	biological_process	biological regulation	16	172	1581	17286	0.0101202	0.510272	0.572912	4.0929e+73	SMAD7,ZNF616,KAT6A,YEATS2,ELK4,RBAK,ZNF845,TMEM189-UBE2V1,SOX21,HOXA10,PPARA,ZNF227,SOX5,ZNF860,BMP2,FOXP4
GO:0031640	killing of cells of other organism	biological_process	cell killing	1	172	72	17286	0.0138889	0.513976	0.575524	4922	NTS
GO:0042531	positive regulation of tyrosine phosphorylation of STAT protein	biological_process	biological regulation	1	172	72	17286	0.0138889	0.513976	0.575524	3572	IL6ST
GO:0060070	canonical Wnt signaling pathway	biological_process	biological regulation	1	172	72	17286	0.0138889	0.513976	0.575524	7473	WNT3
GO:0006935	chemotaxis	biological_process	locomotion	2	172	173	17286	0.0115607	0.515587	0.576813	1126165328	CMTM7,PLAU
GO:0007612	learning	biological_process	behavior	1	172	73	17286	0.0136986	0.518832	0.579408	5743	PTGS2
GO:0071300	cellular response to retinoic acid	biological_process	cellular process	1	172	73	17286	0.0136986	0.518832	0.579408	7473	WNT3
GO:0048812	neuron projection morphogenesis	biological_process	cellular component organization or biogenesis	1	172	74	17286	0.0135135	0.52364	0.584257	100532736	MICOS10-NBL1
GO:0042981	regulation of apoptotic process	biological_process	biological regulation	3	172	279	17286	0.0107527	0.52727	0.587784	8443333064065	CARD11,BIRC3,PERP
GO:0032092	positive regulation of protein binding	biological_process	biological regulation	1	172	75	17286	0.0133333	0.5284	0.58852	650	BMP2
GO:0016192	vesicle-mediated transport	biological_process	localization	3	172	280	17286	0.0107143	0.529685	0.589428	918393412664	ZW10,VAMP3,GDI1
GO:0009749	response to glucose	biological_process	response to stimulus	1	172	76	17286	0.0131579	0.533113	0.59219	285	ANGPT2
GO:0031667	response to nutrient levels	biological_process	response to stimulus	1	172	76	17286	0.0131579	0.533113	0.59219	5465	PPARA
GO:0030182	neuron differentiation	biological_process	cellular process	2	172	179	17286	0.0111732	0.533897	0.592536	33977473	ID1,WNT3
GO:0016032	viral process	biological_process	multi-organism process	6	172	589	17286	0.0101868	0.534837	0.593054	9.90866e+25	G3BP2,SLC20A1,RRP1B,KRT7,IL6ST,PRMT6
GO:0007010	cytoskeleton organization	biological_process	cellular component organization or biogenesis	2	172	180	17286	0.0111111	0.536903	0.593689	38683852	KRT16,KRT5
GO:0009267	cellular response to starvation	biological_process	cellular process	1	172	77	17286	0.012987	0.537779	0.593689	5465	PPARA
GO:0030097	hemopoiesis	biological_process	developmental process	1	172	77	17286	0.012987	0.537779	0.593689	7042	TGFB2
GO:0032436	positive regulation of proteasomal ubiquitin-dependent protein catabolic process	biological_process	cellular process	1	172	77	17286	0.012987	0.537779	0.593689	4092	SMAD7
GO:0097190	apoptotic signaling pathway	biological_process	biological regulation	1	172	77	17286	0.012987	0.537779	0.593689	353376	TICAM2
GO:0002479	antigen processing and presentation of exogenous peptide antigen via MHC class I, TAP-dependent	biological_process	immune system process	1	172	78	17286	0.0128205	0.542399	0.597736	9341	VAMP3
GO:0071407	cellular response to organic cyclic compound	biological_process	cellular process	1	172	78	17286	0.0128205	0.542399	0.597736	650	BMP2
GO:0006821	chloride transport	biological_process	localization	1	172	80	17286	0.0125	0.551501	0.60589	55107	ANO1
GO:0038096	Fc-gamma receptor signaling pathway involved in phagocytosis	biological_process	biological regulation	1	172	80	17286	0.0125	0.551501	0.60589	10095	ARPC1B
GO:0006914	autophagy	biological_process	cellular process	2	172	185	17286	0.0108108	0.551732	0.60589	102879001	RGS19,HAP1
GO:0008152	metabolic process	biological_process	metabolic process	2	172	185	17286	0.0108108	0.551732	0.60589	234623193	FOLH1,GANAB
GO:0000165	MAPK cascade	biological_process	cellular process	3	172	290	17286	0.0103448	0.553452	0.607246	8407878578831	KBTBD7,SCG2,SYNGAP1
GO:0006283	transcription-coupled nucleotide-excision repair	biological_process	cellular process	1	172	81	17286	0.0123457	0.555985	0.608427	5433	POLR2D
GO:0007018	microtubule-based movement	biological_process	cellular process	1	172	81	17286	0.0123457	0.555985	0.608427	23299	BICD2
GO:0030512	negative regulation of transforming growth factor beta receptor signaling pathway	biological_process	negative regulation of biological process	1	172	81	17286	0.0123457	0.555985	0.608427	4092	SMAD7
GO:0090090	negative regulation of canonical Wnt signaling pathway	biological_process	biological regulation	2	172	187	17286	0.0106952	0.55757	0.60963	169200650	TMEM64,BMP2
GO:0008543	fibroblast growth factor receptor signaling pathway	biological_process	biological regulation	1	172	82	17286	0.0121951	0.560424	0.610088	5433	POLR2D
GO:0030183	B cell differentiation	biological_process	cellular process	1	172	82	17286	0.0121951	0.560424	0.610088	84433	CARD11
GO:0033674	positive regulation of kinase activity	biological_process	biological regulation	1	172	82	17286	0.0121951	0.560424	0.610088	2045	EPHA7
GO:0042147	retrograde transport, endosome to Golgi	biological_process	localization	1	172	82	17286	0.0121951	0.560424	0.610088	9341	VAMP3
GO:1901990	regulation of mitotic cell cycle phase transition	biological_process	regulation of biological process	1	172	82	17286	0.0121951	0.560424	0.610088	4085	MAD2L1
GO:0001558	regulation of cell growth	biological_process	biological regulation	1	172	83	17286	0.0120482	0.564818	0.613805	11054	OGFR
GO:0031145	anaphase-promoting complex-dependent catabolic process	biological_process	metabolic process	1	172	83	17286	0.0120482	0.564818	0.613805	4085	MAD2L1
GO:0032496	response to lipopolysaccharide	biological_process	multi-organism process	2	172	190	17286	0.0105263	0.566226	0.614802	57439536	PTGS2,PTGES
GO:0060964	regulation of gene silencing by miRNA	biological_process	biological regulation	1	172	84	17286	0.0119048	0.569169	0.617463	5433	POLR2D
GO:0021987	cerebral cortex development	biological_process	developmental process	1	172	85	17286	0.0117647	0.573477	0.621598	388677	NOTCH2NLA
GO:0016567	protein ubiquitination	biological_process	cellular process	6	172	613	17286	0.00978793	0.574164	0.621804	3.30575e+27	BIRC3,RNF150,SOCS7,UBR3,RNF7,BTBD1
GO:0030030	cell projection organization	biological_process	cellular component organization or biogenesis	2	172	194	17286	0.0103093	0.577579	0.624423	1238119001	CEP20,HAP1
GO:0050821	protein stabilization	biological_process	biological regulation	2	172	194	17286	0.0103093	0.577579	0.624423	40921026	SMAD7,CDKN1A
GO:0045087	innate immune response	biological_process	immune system process	5	172	512	17286	0.00976562	0.5797	0.626176	9.90839e+21	G3BP2,KRT16,TICAM2,SAA2,SAA1
GO:0006469	negative regulation of protein kinase activity	biological_process	biological regulation	1	172	87	17286	0.0114943	0.581965	0.628081	64798	DEPTOR
GO:0050790	regulation of catalytic activity	biological_process	biological regulation	1	172	88	17286	0.0113636	0.586145	0.631505	2664	GDI1
GO:0098869	cellular oxidant detoxification	biological_process	cellular process	1	172	88	17286	0.0113636	0.586145	0.631505	5743	PTGS2
GO:0001843	neural tube closure	biological_process	multicellular organismal process	1	172	89	17286	0.011236	0.590284	0.634872	7042	TGFB2
GO:0035725	sodium ion transmembrane transport	biological_process	localization	1	172	89	17286	0.011236	0.590284	0.634872	6574	SLC20A1
GO:0008104	protein localization	biological_process	localization	1	172	90	17286	0.0111111	0.594382	0.637638	9001	HAP1
GO:0070125	mitochondrial translational elongation	biological_process	cellular process	1	172	90	17286	0.0111111	0.594382	0.637638	84311	MRPL45
GO:0070126	mitochondrial translational termination	biological_process	cellular component organization or biogenesis	1	172	90	17286	0.0111111	0.594382	0.637638	84311	MRPL45
GO:0008286	insulin receptor signaling pathway	biological_process	biological regulation	1	172	91	17286	0.010989	0.598439	0.640345	2887	GRB10
GO:0030307	positive regulation of cell growth	biological_process	cellular component organization or biogenesis	1	172	91	17286	0.010989	0.598439	0.640345	7042	TGFB2
GO:0043087	regulation of GTPase activity	biological_process	biological regulation	1	172	91	17286	0.010989	0.598439	0.640345	8831	SYNGAP1
GO:0006888	ER to Golgi vesicle-mediated transport	biological_process	localization	2	172	202	17286	0.00990099	0.599631	0.641074	3533769183	TICAM2,ZW10
GO:0032259	methylation	biological_process	metabolic process	2	172	203	17286	0.00985222	0.602327	0.642996	15474355170	BMT2,PRMT6
GO:0006606	protein import into nucleus	biological_process	localization	1	172	92	17286	0.0108696	0.602456	0.642996	1026	CDKN1A
GO:0060271	cilium assembly	biological_process	cellular process	2	172	204	17286	0.00980392	0.605009	0.645171	12381151715	CEP20,RAB23
GO:0007059	chromosome segregation	biological_process	cellular process	1	172	93	17286	0.0107527	0.606433	0.64614	55207	ARL8B
GO:0008150	biological_process	biological_process	biological_process	6	172	634	17286	0.00946372	0.607208	0.646416	1.04474e+28	FAM3C,KRT14,SOCS7,KBTBD7,C22orf23,SH3TC1
GO:0002250	adaptive immune response	biological_process	immune system process	2	172	206	17286	0.00970874	0.610331	0.64868	15141520	CTSL,CTSS
GO:0031146	SCF-dependent proteasomal ubiquitin-dependent protein catabolic process	biological_process	cellular process	1	172	94	17286	0.0106383	0.61037	0.64868	9616	RNF7
GO:0008033	tRNA processing	biological_process	cellular process	1	172	95	17286	0.0105263	0.614268	0.65227	283989	TSEN54
GO:0007623	circadian rhythm	biological_process	rhythmic process	1	172	97	17286	0.0103093	0.621949	0.658194	3397	ID1
GO:0014068	positive regulation of phosphatidylinositol 3-kinase signaling	biological_process	biological regulation	1	172	97	17286	0.0103093	0.621949	0.658194	7042	TGFB2
GO:0070498	interleukin-1-mediated signaling pathway	biological_process	regulation of biological process	1	172	97	17286	0.0103093	0.621949	0.658194	387522	TMEM189-UBE2V1
GO:1902476	chloride transmembrane transport	biological_process	localization	1	172	97	17286	0.0103093	0.621949	0.658194	55107	ANO1
GO:0007613	memory	biological_process	behavior	1	172	98	17286	0.0102041	0.625732	0.661081	5743	PTGS2
GO:0019722	calcium-mediated signaling	biological_process	cellular process	1	172	98	17286	0.0102041	0.625732	0.661081	1907	EDN2
GO:0006396	RNA processing	biological_process	cellular process	1	172	99	17286	0.010101	0.629477	0.664477	8634	RTCA
GO:0033138	positive regulation of peptidyl-serine phosphorylation	biological_process	cellular process	1	172	102	17286	0.00980392	0.640491	0.675534	5743	PTGS2
GO:0019216	regulation of lipid metabolic process	biological_process	biological regulation	1	172	104	17286	0.00961538	0.647652	0.681939	5465	PPARA
GO:0030324	lung development	biological_process	developmental process	1	172	104	17286	0.00961538	0.647652	0.681939	5433	POLR2D
GO:0120162	positive regulation of cold-induced thermogenesis	biological_process	biological regulation	1	172	105	17286	0.00952381	0.651179	0.685077	2887	GRB10
GO:0007399	nervous system development	biological_process	developmental process	5	172	557	17286	0.00897666	0.654108	0.687582	5.45101e+26	PCDH18,MICOS10-NBL1,NINJ1,EPHA7,NDRG2
GO:0009636	response to toxic substance	biological_process	response to stimulus	1	172	106	17286	0.00943396	0.654671	0.687597	1026	CDKN1A
GO:0000082	G1/S transition of mitotic cell cycle	biological_process	cellular process	1	172	107	17286	0.00934579	0.658128	0.690071	1026	CDKN1A
GO:0071346	cellular response to interferon-gamma	biological_process	cellular process	1	172	107	17286	0.00934579	0.658128	0.690071	9341	VAMP3
GO:0010468	regulation of gene expression	biological_process	biological regulation	3	172	339	17286	0.00884956	0.659033	0.690441	320654653574	HOXA10,PPARA,IL7
GO:0007218	neuropeptide signaling pathway	biological_process	cellular process	1	172	109	17286	0.00917431	0.66494	0.696048	4922	NTS
GO:0006334	nucleosome assembly	biological_process	cellular component organization or biogenesis	1	172	112	17286	0.00892857	0.674905	0.704714	7994	KAT6A
GO:0006874	cellular calcium ion homeostasis	biological_process	cellular process	1	172	112	17286	0.00892857	0.674905	0.704714	55177	RMDN3
GO:0042391	regulation of membrane potential	biological_process	biological regulation	1	172	112	17286	0.00892857	0.674905	0.704714	1134	CHRNA1
GO:0005975	carbohydrate metabolic process	biological_process	metabolic process	2	172	233	17286	0.00858369	0.676906	0.706214	11318923193	CHST14,GANAB
GO:0009615	response to virus	biological_process	multi-organism process	1	172	115	17286	0.00869565	0.684576	0.713622	10561	IFI44
GO:0001701	in utero embryonic development	biological_process	developmental process	2	172	240	17286	0.00833333	0.69259	0.721376	130507650	UBR3,BMP2
GO:0002223	stimulatory C-type lectin receptor signaling pathway	biological_process	immune system process	1	172	118	17286	0.00847458	0.693961	0.721604	84433	CARD11
GO:0061844	antimicrobial humoral immune response mediated by antimicrobial peptide	biological_process	immune system process	1	172	118	17286	0.00847458	0.693961	0.721604	4922	NTS
GO:0045893	positive regulation of transcription, DNA-templated	biological_process	biological regulation	6	172	695	17286	0.00863309	0.694752	0.721828	7.99492e+24	KAT6A,NOLC1,TMEM189-UBE2V1,PPARA,NEK4,BMP2
GO:0038095	Fc-epsilon receptor signaling pathway	biological_process	cellular process	1	172	120	17286	0.00833333	0.700062	0.726742	84433	CARD11
GO:0030198	extracellular matrix organization	biological_process	cellular component organization or biogenesis	2	172	246	17286	0.00813008	0.705533	0.731815	807817450	COL18A1,VWF
GO:0006629	lipid metabolic process	biological_process	metabolic process	5	172	594	17286	0.00841751	0.708693	0.734184	2.21896e+21	JAZF1,PAFAH1B2,PTGS2,PTGES,PPARA
GO:0051091	positive regulation of DNA-binding transcription factor activity	biological_process	biological regulation	1	172	123	17286	0.00813008	0.708989	0.734184	133746	JMY
GO:0007283	spermatogenesis	biological_process	multi-organism process	4	172	482	17286	0.00829876	0.710379	0.735017	5.04933e+16	PAFAH1B2,BIRC3,TEX19,HOXA10
GO:0016042	lipid catabolic process	biological_process	metabolic process	1	172	124	17286	0.00806452	0.711905	0.735988	5049	PAFAH1B2
GO:0071456	cellular response to hypoxia	biological_process	cellular process	1	172	125	17286	0.008	0.714793	0.738364	5743	PTGS2
GO:0035556	intracellular signal transduction	biological_process	biological regulation	4	172	487	17286	0.00821355	0.717952	0.741016	6.47983e+17	DEPTOR,SOCS7,SCG2,SYNGAP1
GO:0016477	cell migration	biological_process	cellular process	2	172	256	17286	0.0078125	0.726099	0.748808	70428754	TGFB2,ADAM9
GO:0042593	glucose homeostasis	biological_process	biological regulation	1	172	132	17286	0.00757576	0.734214	0.756554	5433	POLR2D
GO:0006397	mRNA processing	biological_process	cellular process	3	172	382	17286	0.0078534	0.735954	0.757724	2839892292723070	TSEN54,HABP4,RRP1B
GO:0043410	positive regulation of MAPK cascade	biological_process	biological regulation	1	172	134	17286	0.00746269	0.739517	0.760768	650	BMP2
GO:0006979	response to oxidative stress	biological_process	response to stimulus	1	172	135	17286	0.00740741	0.742129	0.762829	5743	PTGS2
GO:0009653	anatomical structure morphogenesis	biological_process	developmental process	1	172	138	17286	0.00724638	0.749811	0.770092	11166	SOX21
GO:0007268	chemical synaptic transmission	biological_process	cellular process	2	172	270	17286	0.00740741	0.752851	0.772582	11349001	CHRNA1,HAP1
GO:0006813	potassium ion transport	biological_process	localization	1	172	142	17286	0.00704225	0.759699	0.778972	8645	KCNK5
GO:0006974	cellular response to DNA damage stimulus	biological_process	response to stimulus	4	172	522	17286	0.00766284	0.766925	0.785287	1.33746e+18	JMY,CDKN1A,NEK4,PRMT6
GO:0016579	protein deubiquitination	biological_process	cellular process	2	172	278	17286	0.00719424	0.767112	0.785287	4092330	SMAD7,BIRC3
GO:0018108	peptidyl-tyrosine phosphorylation	biological_process	cellular process	1	172	146	17286	0.00684932	0.769199	0.786139	2045	EPHA7
GO:0071805	potassium ion transmembrane transport	biological_process	cellular process	1	172	146	17286	0.00684932	0.769199	0.786139	8645	KCNK5
GO:0061024	membrane organization	biological_process	cellular component organization or biogenesis	1	172	148	17286	0.00675676	0.773809	0.790205	9341	VAMP3
GO:0055085	transmembrane transport	biological_process	localization	5	172	646	17286	0.00773994	0.774837	0.790612	6.58366e+20	SLC22A4,SLCO2A1,ANO1,SLC20A1,SLC16A3
GO:0007015	actin filament organization	biological_process	cellular component organization or biogenesis	1	172	149	17286	0.00671141	0.776079	0.791234	7171	TPM4
GO:0051056	regulation of small GTPase mediated signal transduction	biological_process	biological regulation	1	172	150	17286	0.00666667	0.778326	0.79288	2664	GDI1
GO:0043524	negative regulation of neuron apoptotic process	biological_process	biological regulation	1	172	152	17286	0.00657895	0.782754	0.796743	8831	SYNGAP1
GO:0006366	transcription by RNA polymerase II	biological_process	cellular process	2	172	291	17286	0.00687285	0.788769	0.802214	54336660	POLR2D,SOX5
GO:0006952	defense response	biological_process	response to stimulus	1	172	156	17286	0.00641026	0.791347	0.804184	9235	IL32
GO:0045944	positive regulation of transcription by RNA polymerase II	biological_process	biological regulation	10	172	1240	17286	0.00806452	0.79715	0.809195	4.0928e+41	SMAD7,KAT6A,ELK4,RRP1B,SOX21,HOXA10,DDN,PPARA,SOX5,BMP2
GO:0007417	central nervous system development	biological_process	developmental process	1	172	159	17286	0.00628931	0.79757	0.809195	6457	SH3GL3
GO:0008380	RNA splicing	biological_process	cellular process	2	172	300	17286	0.00666667	0.802711	0.813752	2292723076	HABP4,RRP1B
GO:0034220	ion transmembrane transport	biological_process	localization	2	172	304	17286	0.00657895	0.808643	0.819103	551071134	ANO1,CHRNA1
GO:0007156	homophilic cell adhesion via plasma membrane adhesion molecules	biological_process	biological adhesion	1	172	166	17286	0.0060241	0.811381	0.821212	54510	PCDH18
GO:0050852	T cell receptor signaling pathway	biological_process	biological regulation	1	172	178	17286	0.00561798	0.832912	0.842324	84433	CARD11
GO:0030036	actin cytoskeleton organization	biological_process	cellular component organization or biogenesis	1	172	194	17286	0.00515464	0.857866	0.866859	219537	SMTNL1
GO:0043547	positive regulation of GTPase activity	biological_process	biological regulation	2	172	350	17286	0.00571429	0.866275	0.874652	26648831	GDI1,SYNGAP1
GO:0006325	chromatin organization	biological_process	cellular component organization or biogenesis	2	172	364	17286	0.00549451	0.880384	0.888181	799455170	KAT6A,PRMT6
GO:0070374	positive regulation of ERK1 and ERK2 cascade	biological_process	biological regulation	1	172	227	17286	0.00440529	0.898232	0.905459	650	BMP2
GO:0006897	endocytosis	biological_process	localization	1	172	241	17286	0.00414938	0.911698	0.918294	6457	SH3GL3
GO:0006281	DNA repair	biological_process	cellular process	2	172	403	17286	0.00496278	0.912781	0.918646	13374655170	JMY,PRMT6
GO:0000398	mRNA splicing, via spliceosome	biological_process	cellular process	1	172	252	17286	0.00396825	0.921022	0.926197	5433	POLR2D
GO:0000209	protein polyubiquitination	biological_process	cellular process	1	172	267	17286	0.00374532	0.932179	0.936664	387522	TMEM189-UBE2V1
GO:0055114	oxidation-reduction process	biological_process	metabolic process	4	172	730	17286	0.00547945	0.935945	0.939695	5521457439536650	P3H2,PTGS2,PTGES,BMP2
GO:0006357	regulation of transcription by RNA polymerase II	biological_process	biological regulation	5	172	909	17286	0.00550055	0.951677	0.954724	2.00513e+24	ELK4,JMY,SOX21,CDKN1A,FOXP4
GO:0007608	sensory perception of smell	biological_process	multicellular organismal process	1	172	427	17286	0.00234192	0.986751	0.989119	130507	UBR3
GO:0007186	G protein-coupled receptor signaling pathway	biological_process	biological regulation	5	172	1189	17286	0.00420521	0.993181	0.994769	1.02876e+20	RGS19,SAA2,NTS,SAA1,EDN2
GO:0002376	immune system process	biological_process	immune system process	1	172	538	17286	0.00185874	0.995771	0.996566	9908	G3BP2
GO:0050896	response to stimulus	biological_process	response to stimulus	1	172	582	17286	0.00171821	0.997317	0.997317	5433	POLR2D
